# Supplementary material for: Iron-catalyzed aryl–aryl cross-coupling reaction tolerating amides and unprotected quinolinones
Source: Royal Society of Chemistry journal article supplement (doi:10.1039/b618617c), 2007-01-01
Supplement: b618617c.pdf [file b618617c.pdf]

## **Iron-Catalyzed Aryl-Aryl Cross-Coupling Tolerating Secondary Amides and Unprotected Quinolinones**

**Christiane C. Kofink, Benoît Blank, Sandro Pagano, Nadine Götz, Paul Knochel\***

\*Department Chemie und Biochemie, Ludwig-Maximilians-Universität München, Butenandtstr. 5-13, Haus F, 81377 München, Germany.

### **General considerations**

Unless otherwise indicated, all reactions were carried out with magnetic stirring and in case of air- or moisture-sensitive compounds in flame-dried glassware under nitrogen. Syringes were used to transfer the reagents and the solvents were purged with nitrogen prior to use. Reactions were monitored by gas chromatography (GC and GC-MS) or thin layer chromatography.

Solutions of organomagnesium compounds were prepared, if not especially mentioned, by the reaction of Mg with aryl bromides in THF, titrated with a standard solution of I<sub>2</sub> in 0.5 M LiCl in THF and diluted with THF to the mentioned concentration.

## Typical Procedures (TP)

### Typical procedure for iron-catalyzed cross-coupling reactions (TP 1)

A dried, nitrogen flushed 25 mL Schlenk tube, equipped with a magnetic stirring bar, was charged with the arylmagnesium reagent (3.0 equiv). Dry DME (5 mL/mmol) was added, the mixture cooled to -20 °C, CuCN·2LiCl (2.8 equiv) added dropwise and the solution stirred for 20 min. The electrophile (1.0 equiv), Fe(acac)<sub>3</sub> (10 mol%) and DME (2 mL/mmol) were added consecutively and the solution vigorously stirred at 80 °C. After complete conversion (approx. 4 h) the reaction was quenched with saturated, aqueous NH<sub>4</sub>Cl (50 mL) and extracted with ethyl acetate (3 x 20 mL). The combined organic layers were washed with a saturated NH<sub>4</sub>Cl/NH<sub>3</sub> (9:1) solution (50 mL), with brine (20 mL), dried over MgSO<sub>4</sub> and the solvent removed *in vacuo*. Purification by flash chromatography on silica gel furnished the product. In cases where the isolated yields were below 80% no full conversion could be obtained.

### Typical procedure for iron-catalyzed cross-coupling reactions with preceding iodine-magnesium exchange (TP 2)

A dried, nitrogen flushed 25 mL Schlenk tube, equipped with a magnetic stirring bar, was charged with aryl iodide (3.0 equiv). Dry DME (5 mL/mmol) was added, the mixture cooled to -20 °C and *i*PrMgCl (3.1 equiv) was added dropwise. The I/Mg exchange was usually complete after 30 min (checked by GC analysis of reaction aliquots) and then CuCN·2LiCl (2.8 equiv) was added dropwise and the solution stirred for 20 min. The electrophile (1.0 equiv), Fe(acac)<sub>3</sub> (10 mol%) and DME (2 mL/mmol) were added consecutively and the solution vigorously stirred at 80 °C. After complete conversion (approx. 4 h) the reaction was quenched with saturated, aqueous NH<sub>4</sub>Cl (50 mL) and extracted with ethylacetate (3 x 20 mL). The combined organic layers were washed with a sat. NH<sub>4</sub>Cl/NH<sub>3</sub> (9:1) solution (50 mL), with brine (20 mL), dried over MgSO<sub>4</sub> and the solvent removed *in vacuo*.

Purification by flash chromatography on silica gel furnished the product. In cases where the isolated yields were below 80% no full conversion could be obtained.

**Typical procedure for the protection of aromatic amines with *p*-anisoylchloride (TP 3)**

A dry and nitrogen flushed 100 mL flask, equipped with a magnetic stirring bar and a septum, was charged with the corresponding amine (1.0 equiv). Dry dioxane (2 mL/mmol) and dry pyridine (1 mL/mmol) were added, the mixture cooled to 0 °C and *p*-anisoyl chloride (1.05 equiv) added dropwise. After the addition, the reaction mixture was stirred at 0 °C for 30 min and then left to warm to rt and stirred vigorously until TLC analysis indicated complete conversion. Water was added to the reaction mixture as well as 1 M HCl, until the aqueous phase was at pH = 3-5. The precipitate was subsequently filtered through a glass sinter and washed with water (2 x 20 mL). Recrystallization from ethanol furnished the pure product.

**2,2,2-Trifluoro-*N*-(2-iodo-phenyl)-acetamide (2a)**

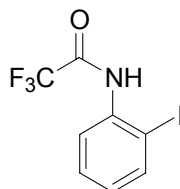

2-Iodoaniline (2.19 g, 10.0 mmol) was dissolved in 35 mL dry THF, followed by addition of TEA (1.6 mL). The solution was cooled to -15 °C and trifluoroacetic acid anhydride (2.52 g, 12.0 mmol) added dropwise. The reaction mixture was stirred at -15 °C for 1 h, allowed to warm to rt and stirred for 12 h. After completion of the reaction, water (30 mL) was added, the aqueous phase extracted with diethyl ether (3 x 20 mL), the combined organic layers washed with brine, dried over Na<sub>2</sub>SO<sub>4</sub> and concentrated *in vacuo*. The residue was then purified by flash chromatography (pentane/diethyl ether = 5:1) and provided **2a** as a colorless solid (3.02 g, 96 %).

**Mp.:** 109.6-110.7 °C.

**<sup>1</sup>H-NMR** (300 MHz, CDCl<sub>3</sub>): δ = 8.27 (s<sub>br</sub>, 1H), 8.20 (dd, *J* = 8.2, 1.5 Hz, 1H), 7.84 (dd, *J* = 7.9, 1.5 Hz, 1H), 7.41 (ddd, *J* = 8.0, 7.3, 1.3 Hz, 1H), 6.97 (td, *J* = 7.7, 1.6 Hz, 1H).

**<sup>13</sup>C-NMR** ( MHz, CDCl<sub>3</sub>): δ = 154.7 (q, *J* = 37.6 Hz), 139.2, 135.7, 129.6, 127.9, 122.1, 115.6 (q, *J* = 288.6 Hz), 90.2.

**MS** (70 eV, EI), *m/z* (%): 315 (24) [M<sup>+</sup>], 188 (100), 168 (19), 119 (10), 102 (11), 91 (19).

**IR** (KBr):  $\tilde{\nu}$  = 3853 (w), 3745 (w), 3204 (m), 3062 (w), 1707 (vs), 1545 (m), 1466 (m), 1276 (m), 1238 (m), 1202 (s), 1265, (vs), 1147 (vs), 912 (m), 758 (m), 733 (m).

**HRMS** for C<sub>8</sub>H<sub>5</sub>F<sub>3</sub>INO (314.9368): found: 314.9377.

**2,2,2-Trifluoro-N-(2-iodo-phenyl)-acetamide (2a)**

|                        |                                                       |                      |                          |                       |             |
|------------------------|-------------------------------------------------------|----------------------|--------------------------|-----------------------|-------------|
| Acquisition Time (sec) | 2.0486                                                | Comment              | Benoit Blank, AK Knochel | Date                  | Feb 23 2006 |
| File Name              | \\srvknoch2\bblch\Spektr\NMR\300 MHz\bbl020_Proton_01 |                      |                          | Frequency (MHz)       | 300.10      |
| Nucleus                | <sup>1</sup> H                                        | Number of Transients | 8                        | Original Points Count | 9849        |
| Pulse Sequence         | s2pul                                                 | Solvent              | CHLOROFORM-D             | Points Count          | 16384       |
| Temperature (degree C) | 27.000                                                |                      |                          | Sweep Width (Hz)      | 4807.69     |

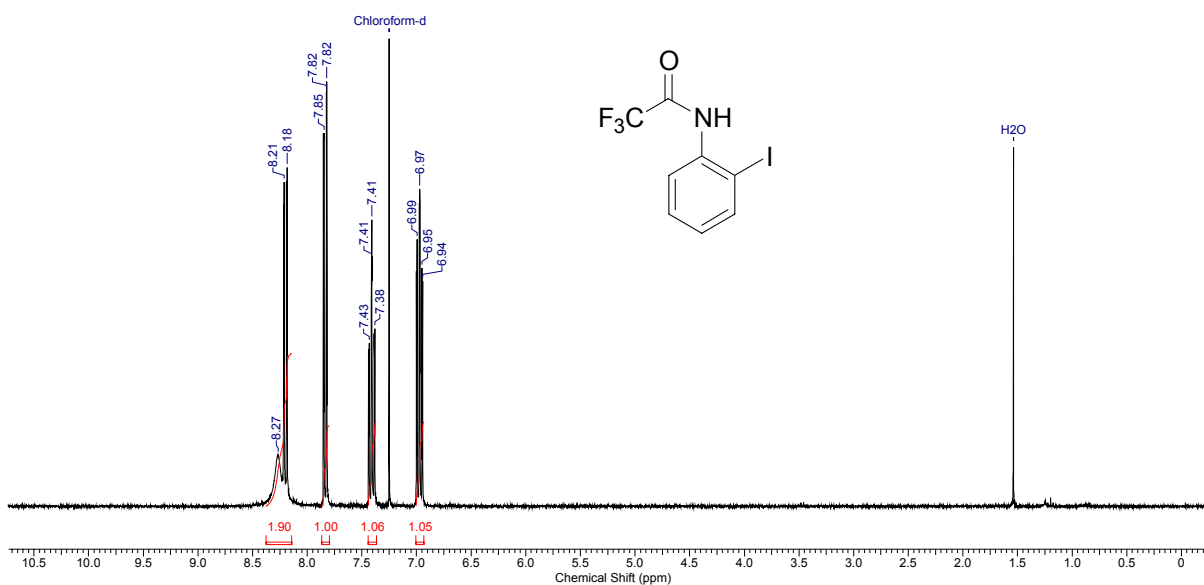

|                        |                                                       |                      |                          |                       |             |
|------------------------|-------------------------------------------------------|----------------------|--------------------------|-----------------------|-------------|
| Acquisition Time (sec) | 1.3005                                                | Comment              | Benoit Blank, AK Knochel | Date                  | Feb 23 2006 |
| File Name              | \\srvknoch2\bblch\Spektr\NMR\300 MHz\bbl020_Carbon_01 |                      |                          | Frequency (MHz)       | 75.47       |
| Nucleus                | <sup>13</sup> C                                       | Number of Transients | 2000                     | Original Points Count | 23560       |
| Pulse Sequence         | s2pul                                                 | Solvent              | CHLOROFORM-D             | Points Count          | 32768       |
| Temperature (degree C) | 27.000                                                |                      |                          | Sweep Width (Hz)      | 18115.94    |

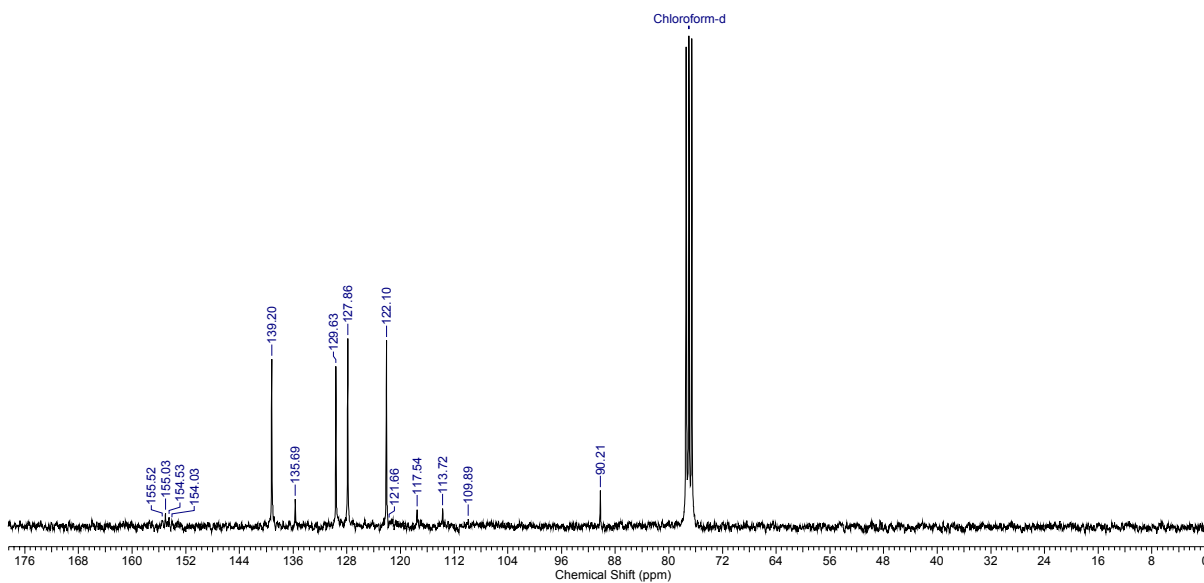

***N*-(2-Iodo-phenyl)-acetamide (2b)**

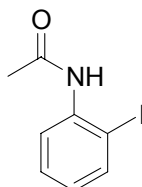

A dried 100 mL round-bottom flask, equipped with a magnetic stirring bar, was charged with 2-iodoaniline (1.10 g, 5.00 mmol), CH<sub>2</sub>Cl<sub>2</sub> (37.5 mL), AgCN (0.70 g, 5.00 mmol) and MeCN (37.5 mL). Acetyl chloride (0.79 g, 10.0 mmol) was added dropwise and the reaction mixture stirred at rt for 12 h. After completion of the reaction the precipitate was filtered over celite and washed with CH<sub>2</sub>Cl<sub>2</sub>. The filtrate was then washed with 5% NaHCO<sub>3</sub>-solution (20 mL) followed by a 1 M citric acid solution (20 mL). The combined organic layers were then washed with brine, dried over Na<sub>2</sub>SO<sub>4</sub> and concentrated *in vacuo*. Recrystallization from ethanol yielded **2b** as colorless crystals (654 mg, 50 %).

**Mp.:** 110.0-110.6 °C.

**<sup>1</sup>H-NMR** (600 MHz, CDCl<sub>3</sub>): δ = 8.18 (d, *J*= 7.5 Hz, 1H), 7.76 (d, *J*= 7.9 Hz, 1H), 7.41 (s<sub>br</sub>, 1H), 7.32 (t, *J*= 7.3 Hz, 1H), 6.83 (t, *J*= 7.4 Hz, 1H), 2.22 (s, 3H).

**<sup>13</sup>C-NMR** (150 MHz, CDCl<sub>3</sub>): δ = 168.2, 138.7, 138.2, 129.2, 125.9, 122.1, 89.9, 24.8.

**MS** (70 eV, EI), *m/z* (%): 261 (15) [M<sup>+</sup>], 219 (98), 134 (100), 92 (30), 65 (10).

**IR** (KBr):  $\tilde{\nu}$  = 3271 (s), 1658 (m), 1573 (m), 1525 (s), 1431 (m), 1290 (s), 1013 (m), 749 (m).

**HRMS** for C<sub>8</sub>H<sub>8</sub>INO (260.9651): found: 260.9640.

***N*-(2-Iodo-phenyl)-acetamide (2b)**

|                        |                                                      |                      |                          |                       |                  |              |       |
|------------------------|------------------------------------------------------|----------------------|--------------------------|-----------------------|------------------|--------------|-------|
| Acquisition Time (sec) | 4.0000                                               | Comment              | Benoit Blank, AK Knochel |                       | Date             | Feb 9 2006   |       |
| File Name              | \svr\knoch2\bb\chSpektr\NMR\600 MHz\bbi002_Protan_01 |                      |                          | Frequency (MHz)       | 599.71           |              |       |
| Nucleus                | 1H                                                   | Number of Transients | 8                        | Original Points Count | 28902            | Points Count | 32768 |
| Pulse Sequence         | s2pul                                                | Solvent              | CHLOROFORM-D             |                       | Sweep Width (Hz) | 7225.43      |       |
| Temperature (degree C) | 27.000                                               |                      |                          |                       |                  |              |       |

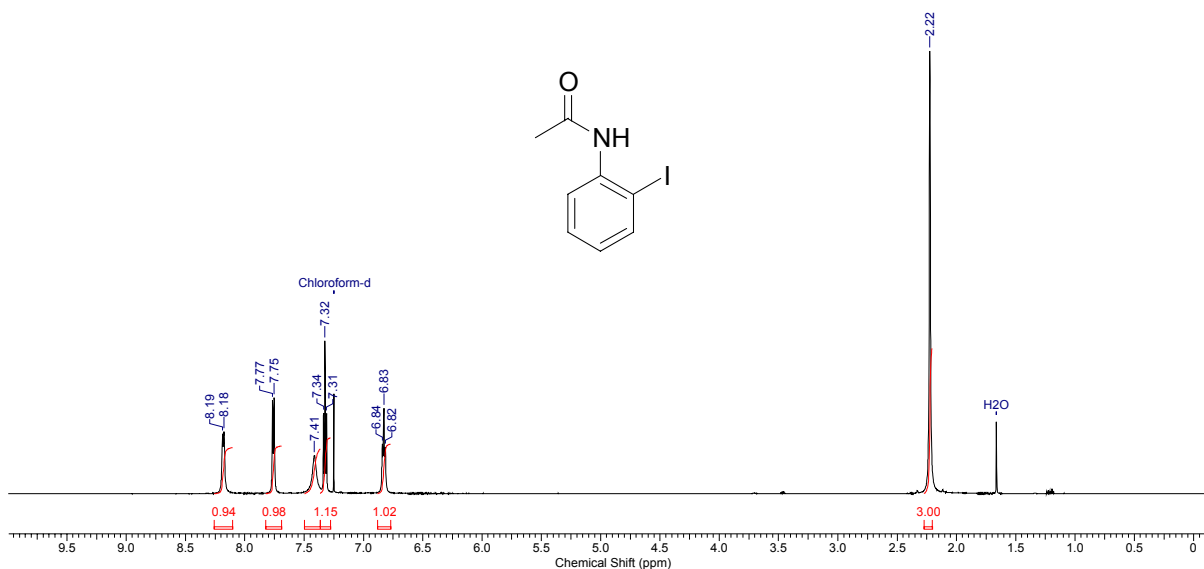

|                        |                                                      |                      |                          |                       |                  |              |       |
|------------------------|------------------------------------------------------|----------------------|--------------------------|-----------------------|------------------|--------------|-------|
| Acquisition Time (sec) | 1.6000                                               | Comment              | Benoit Blank, AK Knochel |                       | Date             | Feb 9 2006   |       |
| File Name              | \svr\knoch2\bb\chSpektr\NMR\600 MHz\bbi002_Carbon_01 |                      |                          | Frequency (MHz)       | 150.81           |              |       |
| Nucleus                | 13C                                                  | Number of Transients | 512                      | Original Points Count | 58824            | Points Count | 65536 |
| Pulse Sequence         | s2pul                                                | Solvent              | CHLOROFORM-D             |                       | Sweep Width (Hz) | 36764.71     |       |
| Temperature (degree C) | 27.000                                               |                      |                          |                       |                  |              |       |

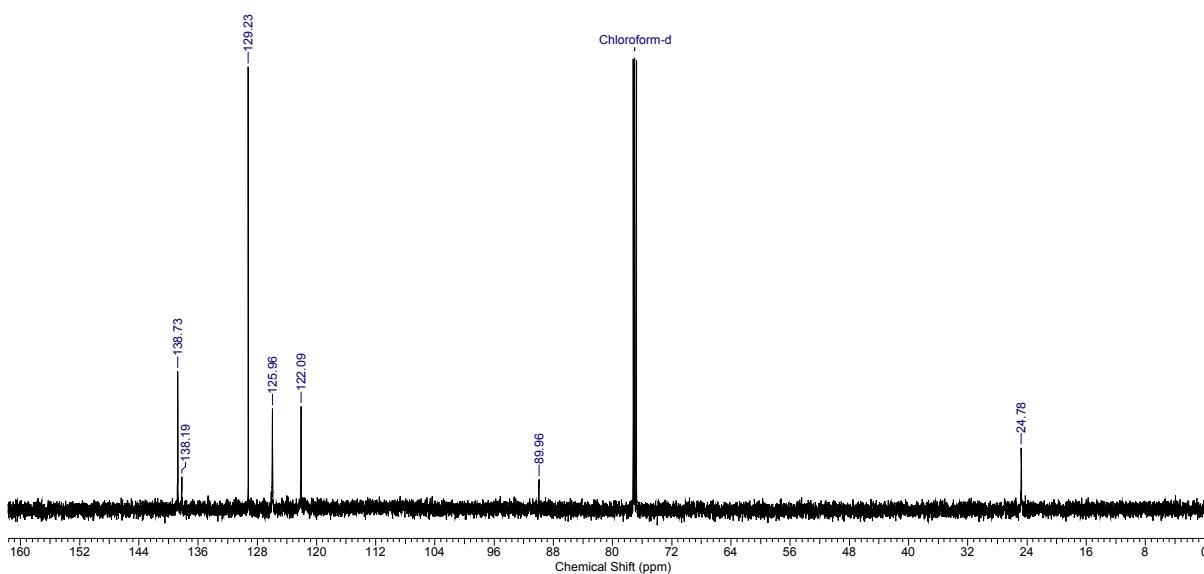

***N*-(2-Iodo-phenyl)-benzamide (2c)**

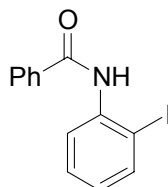

A dried 100 mL round-bottom flask, equipped with a magnetic stirring bar, was charged with 2-iodoaniline (1.10 g, 5.00 mmol), CH<sub>2</sub>Cl<sub>2</sub> (37.5 mL), AgCN (0.700 g, 5.00 mmol) and MeCN (37.5 mL). Benzoyl chloride (1.41 g, 10.0 mmol) was added dropwise and the reaction mixture stirred at rt for 12 h. After completion of the reaction the precipitate was filtered over celite and washed with CH<sub>2</sub>Cl<sub>2</sub>. The filtrate was then washed with 5% NaHCO<sub>3</sub>-solution (20 mL) followed by a 1 M citric acid solution (20 mL). The combined organic layers were washed with brine, dried over Na<sub>2</sub>SO<sub>4</sub> and concentrated *in vacuo*. Recrystallization from ethanol yielded **2c** as colorless crystals (1.25 g, 77 %).

**Mp.:** 139.0-139.8 °C.

**<sup>1</sup>H-NMR** (600 MHz, CDCl<sub>3</sub>): δ = 8.46 (dd, *J* = 8.2, 1.5 Hz, 1H), 8.28 (s<sub>br</sub>, 1H), 7.98-7.97 (m, 2H), 7.81 (dd, *J* = 8.0, 1.4 Hz, 1H), 7.58 (m, 1H), 7.52 (t, *J* = 7.5 Hz, 2H), 7.40 (m, 1H), 6.88 (td, *J* = 7.6, 1.5 Hz, 1H).

**<sup>13</sup>C-NMR** (150 MHz, CDCl<sub>3</sub>): δ = 165.3, 138.8, 138.3, 134.5, 132.2, 129.4, 128.9, 127.2, 126.0, 121.8, 90.2.

**MS** (70 eV, EI), *m/z* (%): 322 (5) [M<sup>+</sup>], 196 (100), 167 (3), 105 (78), 91 (5), 77 (36).

**IR** (KBr):  $\tilde{\nu}$  = 3210 (w), 1647 (m), 1571 (w), 1513 (m), 1464 (s), 1425 (m), 1297 (s), 1014 (m), 912 (m), 746 (s), 708 (s).

**HRMS** for C<sub>13</sub>H<sub>10</sub>INO (322.9807): found: 322.9789.



### *N*-(2-Iodo-phenyl)-benzamide (2c)

|                        |                                                       |                      |                          |                       |             |
|------------------------|-------------------------------------------------------|----------------------|--------------------------|-----------------------|-------------|
| Acquisition Time (sec) | 4.0000                                                | Comment              | Benoit Blank, AK Knochel | Date                  | Feb 13 2006 |
| File Name              | \\srvknoch2\bblch\Spektr\NMR\600 MHz\bbl001_Proton_01 |                      |                          | Frequency (MHz)       | 599.71      |
| Nucleus                | <sup>1</sup> H                                        | Number of Transients | 8                        | Original Points Count | 38462       |
| Pulse Sequence         | s2pul                                                 | Solvent              | CHLOROFORM-D             | Points Count          | 65536       |
| Temperature (degree C) | 27.000                                                |                      |                          | Sweep Width (Hz)      | 9615.38     |

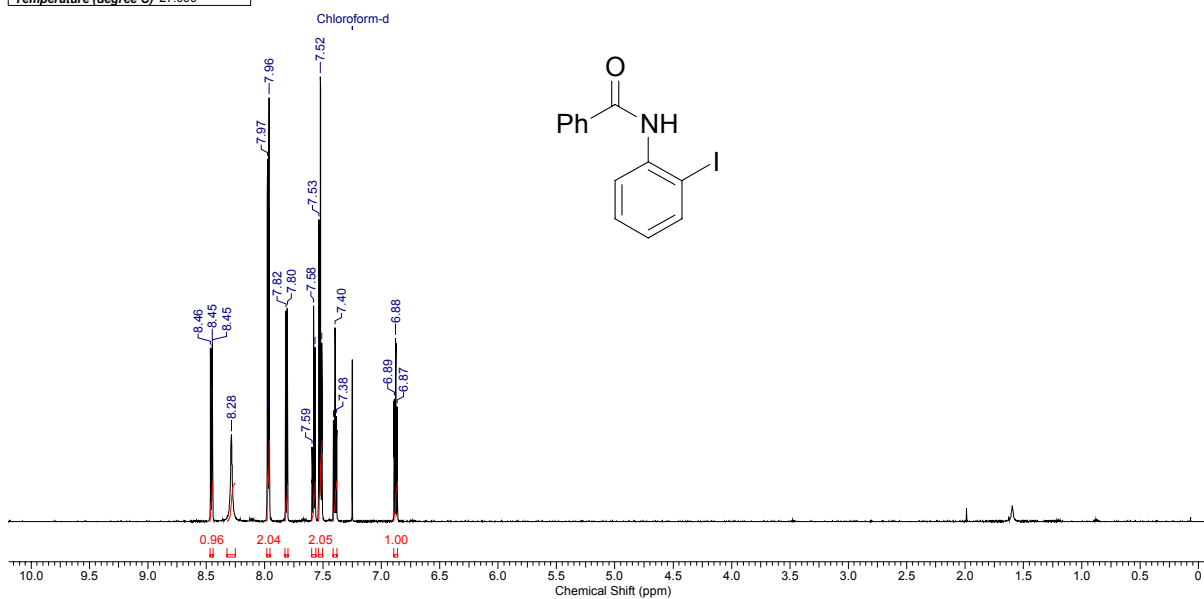

# Supplementary Material (ESI) for Chemical Communications

# This journal is (c) The Royal Society of Chemistry 2007

|                        |                                                         |                      |                          |                       |             |
|------------------------|---------------------------------------------------------|----------------------|--------------------------|-----------------------|-------------|
| Acquisition Time (sec) | 1.6000                                                  | Comment              | Benoit Blank, AK Knochel | Date                  | Feb 13 2006 |
| File Name              | \\slnknoch2\bbich\Spektren\NMR\600 MHz\bbi001_Carbon_01 |                      |                          | Frequency (MHz)       | 150.81      |
| Nucleus                | <sup>13</sup> C                                         | Number of Transients | 1000                     | Original Points Count | 58824       |
| Pulse Sequence         | s2pul                                                   | Solvent              | CHLOROFORM-D             | Points Count          | 65536       |
| Temperature (degree C) | 27.000                                                  |                      |                          | Sweep Width (Hz)      | 36764.71    |

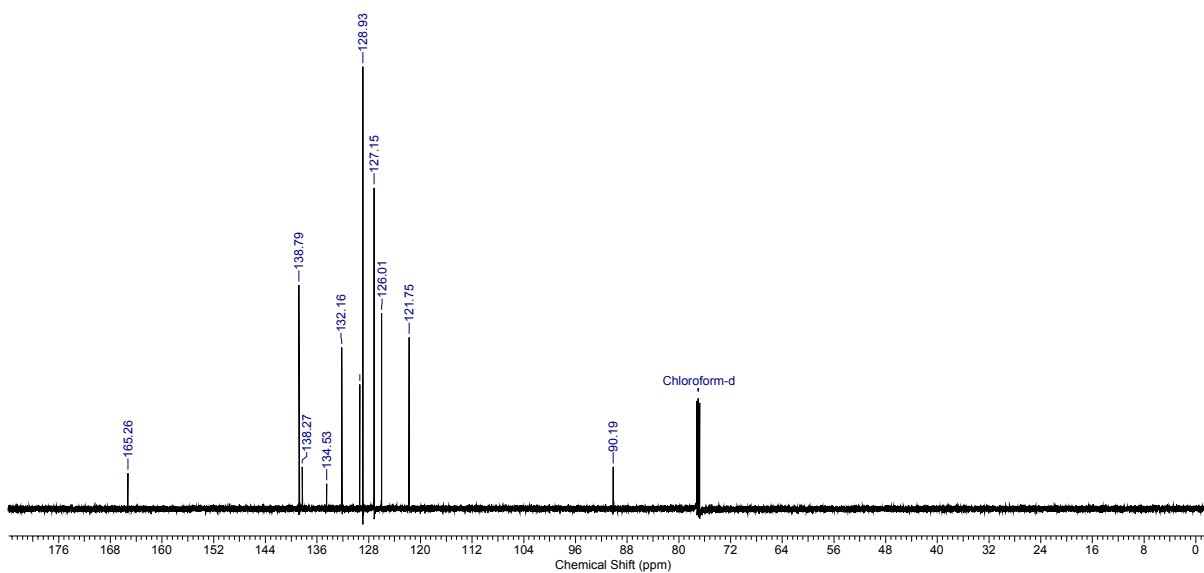

***N*-(2-Iodo-phenyl)-4-methoxy-benzamide (2d)**

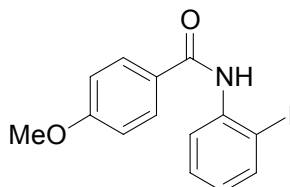

4-Methoxybenzoyl chloride (2.56 g, 15.0 mmol) diluted in 10 mL CH<sub>2</sub>Cl<sub>2</sub> was added dropwise to a vigorously stirred solution of 2-iodoaniline (2.19 g, 10.0 mmol) in CH<sub>2</sub>Cl<sub>2</sub> (90 mL) and TEA (1.4 mL, 10 mmol). On completion of the addition, the reaction mixture was stirred for 2 d at rt. The reaction mixture was washed with 1 M HCl (2 x 100 mL), the aqueous phase extracted with CH<sub>2</sub>Cl<sub>2</sub> (3 x 20 mL), the combined organic layers washed with sat. NaHCO<sub>3</sub>-solution (20 mL), with brine (20 mL), dried over Na<sub>2</sub>SO<sub>4</sub> and concentrated *in vacuo*. The residue was then purified by flash chromatography (pentane/diethyl ether = 4:1) and provided **2d** as a pale yellow solid (872 mg, 25 %).

**Mp.:** 154.4-155.2 °C.

**<sup>1</sup>H-NMR** (300 MHz, CDCl<sub>3</sub>): δ = 8.4 (dd, *J*= 8.2, 1.6 Hz, 1H), 8.21 (s<sub>br</sub>, 1H), 7.96-7.90 (m, 2H), 7.80 (dd, *J*= 8.0, 1.6 Hz, 1H), 7.41-7.35 (m, 1H), 7.03-6.98 (m, 2H), 6.86 (td, *J*= 7.6, 1.7 Hz, 1H), 3.88 (s, 3H).

**<sup>13</sup>C-NMR** ( MHz, CDCl<sub>3</sub>): δ = 164.8, 162.8, 138.7, 138.5, 129.4, 129.1, 126.8, 125.8, 121.6, 114.2, 90.1, 55.5.

**MS** (70 eV, EI), *m/z* (%): 353 (3) [M<sup>+</sup>], 226 (42), 135 (100), 107 (8), 92 (10), 77 (12).

**IR** (KBr):  $\tilde{\nu}$  = 3258 (m), 3018 (w), 2838 (w), 1642 (s), 1605 (s), 1573 (m), 1501 (vs), 1430 (s), 1295 (s), 1252 (vs), 1176 (vs), 1103 (m), 1015 (s), 907 (w), 840 (m), 750 (vs).

**HRMS** for C<sub>14</sub>H<sub>12</sub>INO<sub>2</sub> (352.9913): found: 352.9925.

***N*-(2-Iodo-phenyl)-4-methoxy-benzamide (2d)**

|                        |                                                    |                      |                          |                       |             |
|------------------------|----------------------------------------------------|----------------------|--------------------------|-----------------------|-------------|
| Acquisition Time (sec) | 4.1943                                             | Comment              | Benoit Blank, AK Knochel | Date                  | Mar 14 2006 |
| File Name              | \\srknoc2\bbch\Spektr\NMR\300 MHz\bbi035_Protan_01 |                      |                          | Frequency (MHz)       | 300.10      |
| Nucleus                | <sup>1</sup> H                                     | Number of Transients | 8                        | Original Points Count | 16384       |
| Pulse Sequence         | s2pul                                              | Solvent              | CHLOROFORM-D             | Points Count          | 16384       |
| Temperature (degree C) | 27.000                                             |                      |                          | Sweep Width (Hz)      | 3906.25     |

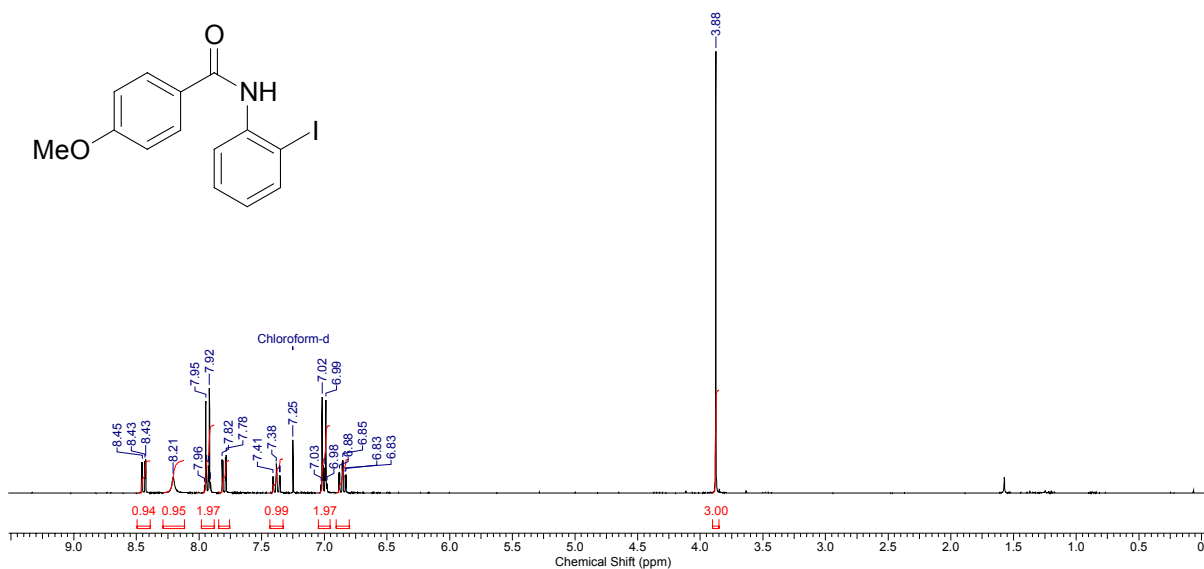

|                        |                                                    |                      |                          |                       |             |
|------------------------|----------------------------------------------------|----------------------|--------------------------|-----------------------|-------------|
| Acquisition Time (sec) | 1.6010                                             | Comment              | Benoit Blank, AK Knochel | Date                  | Mar 14 2006 |
| File Name              | \\srknoc2\bbch\Spektr\NMR\300 MHz\bbi035_Carbon_01 |                      |                          | Frequency (MHz)       | 75.47       |
| Nucleus                | <sup>13</sup> C                                    | Number of Transients | 1024                     | Original Points Count | 29004       |
| Pulse Sequence         | s2pul                                              | Solvent              | CHLOROFORM-D             | Points Count          | 32768       |
| Temperature (degree C) | 27.000                                             |                      |                          | Sweep Width (Hz)      | 18115.94    |

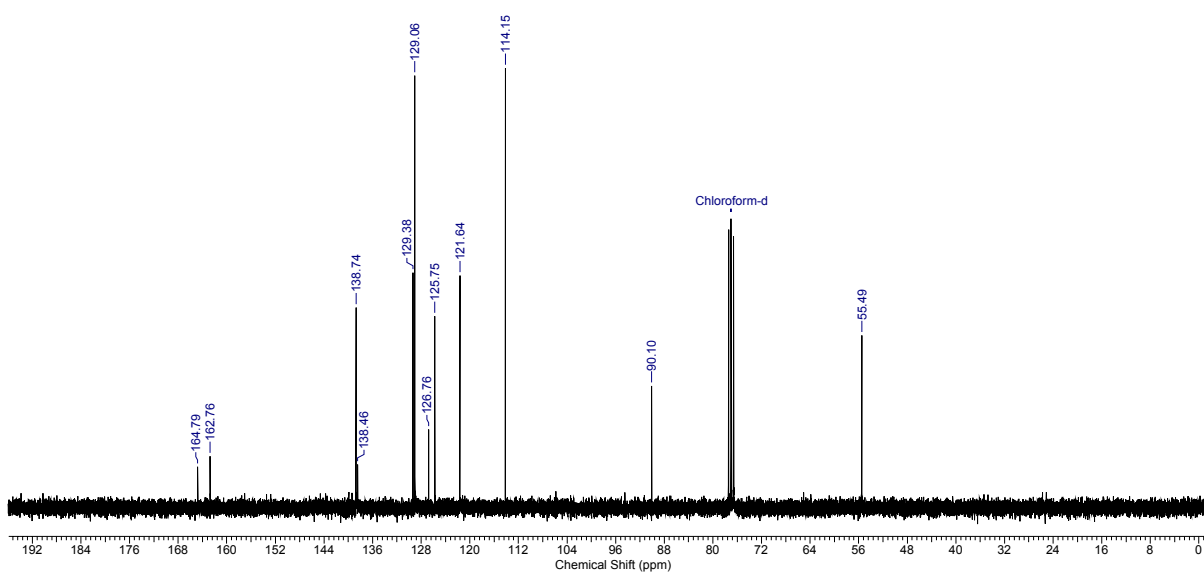

**1,1,1-Trifluoro-*N*-(2-iodophenyl)methanesulfonamide (2e)**

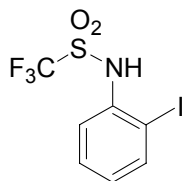

2-Iodoaniline (2.19 g, 10.0 mmol) was dissolved in 30 mL dry CH<sub>2</sub>Cl<sub>2</sub> under N<sub>2</sub>, followed by addition of TEA (1.6 mL). The solution was cooled to 0 °C and trifluoromethanesulfonic acid anhydride (3.39 g, 12.0 mmol) added dropwise. The reaction mixture was stirred at 0 °C for 2 h, allowed to warm to rt. After completion of the reaction, water (20 mL) was added, the aqueous phase extracted with CH<sub>2</sub>Cl<sub>2</sub> (3 x 20 mL), the combined organic layers washed with brine (20 mL), dried over Na<sub>2</sub>SO<sub>4</sub> and concentrated *in vacuo*. The crude black oil was distilled at 90 °C (0.2 mbar) to give a pale yellow liquid that was subsequently purified by flash chromatography (pentane/ethyl acetate = 2:1) and provided **2e** as pale yellow crystals (915 mg, 26 %).

**Mp.:** 53.8-55.0 °C.

**<sup>1</sup>H-NMR** (400 MHz, CDCl<sub>3</sub>): δ = 7.84 (dd, *J* = 8.2, 1.4 Hz, 1H), 7.59 (dd, *J* = 8.3, 1.3 Hz, 1H), 7.38 (ddd, 8.5, 7.0, 1.4 Hz, 1H), 7.03-6.98 (m, 1H).

**<sup>13</sup>C-NMR** (100 MHz, CDCl<sub>3</sub>): δ = 139.8, 135.8, 130.0, 128.9, 123.7, 120.0 (q, *J* = 322 Hz), 93.1.

**MS** (70 eV, EI), *m/z* (%): 351 (100) [M<sup>+</sup>], 218 (94), 91 (43), 64 (8).

**IR** (KBr):  $\tilde{\nu}$  = 3269 (m), 1469 (m), 1413 (s), 1363 (m), 1204 (vs), 1179 (s), 1114 (vs), 1018 (m), 925 (m), 816 (m), 753 (vs), 709 (s), 648 (m), 631 (vs).

**HRMS** for C<sub>7</sub>H<sub>5</sub>F<sub>3</sub>INO<sub>2</sub>S (350.9038): found: 350.9049.

**1,1,1-Trifluoro-N-(2-iodophenyl)methanesulfonamide (2e)**

|                        |                                                       |                      |                          |                       |             |
|------------------------|-------------------------------------------------------|----------------------|--------------------------|-----------------------|-------------|
| Acquisition Time (sec) | 4.0000                                                | Comment              | Benoit Blank, AK Knochel | Date                  | Apr 18 2006 |
| File Name              | \\srvknoch2\bblch\Spektr\NMR\400 MHz\bbl065_Proton_01 |                      |                          | Frequency (MHz)       | 399.94      |
| Nucleus                | <sup>1</sup> H                                        | Number of Transients | 16                       | Original Points Count | 20797       |
| Pulse Sequence         | s2pul                                                 | Solvent              | CHLOROFORM-D             | Points Count          | 32768       |
| Temperature (degree C) | 30.000                                                |                      |                          | Sweep Width (Hz)      | 5199.19     |

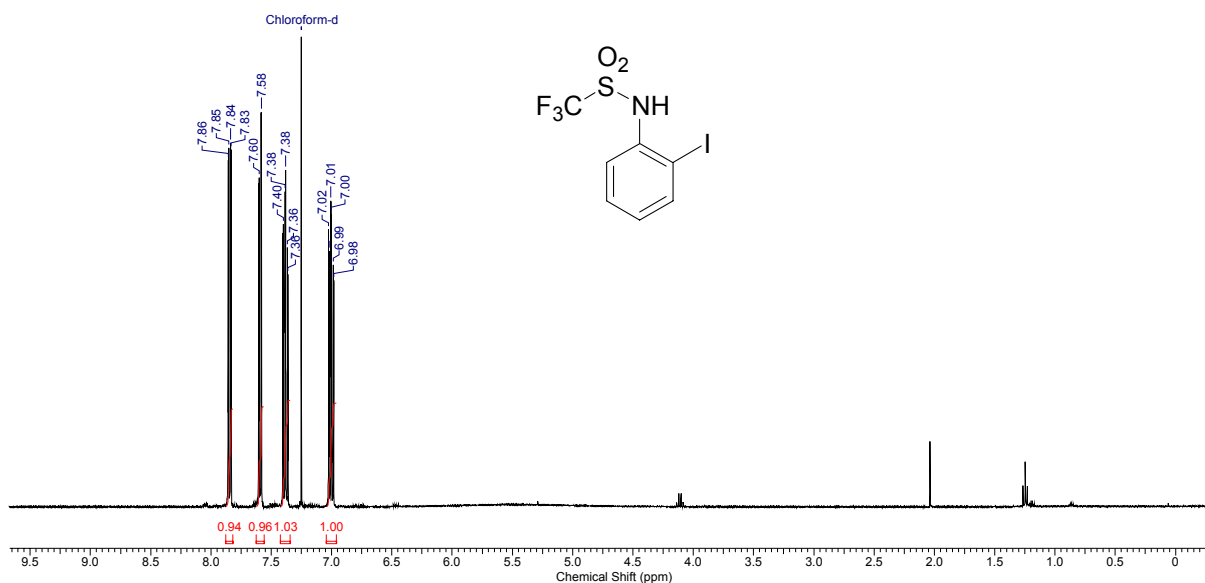

|                        |                                                       |                      |                          |                       |             |
|------------------------|-------------------------------------------------------|----------------------|--------------------------|-----------------------|-------------|
| Acquisition Time (sec) | 1.6000                                                | Comment              | Benoit Blank, AK Knochel | Date                  | Apr 18 2006 |
| File Name              | \\srvknoch2\bblch\Spektr\NMR\400 MHz\bbl065_Carbon_01 |                      |                          | Frequency (MHz)       | 100.58      |
| Nucleus                | <sup>13</sup> C                                       | Number of Transients | 4096                     | Original Points Count | 38612       |
| Pulse Sequence         | s2pul                                                 | Solvent              | CHLOROFORM-D             | Points Count          | 65536       |
| Temperature (degree C) | 30.000                                                |                      |                          | Sweep Width (Hz)      | 24132.73    |

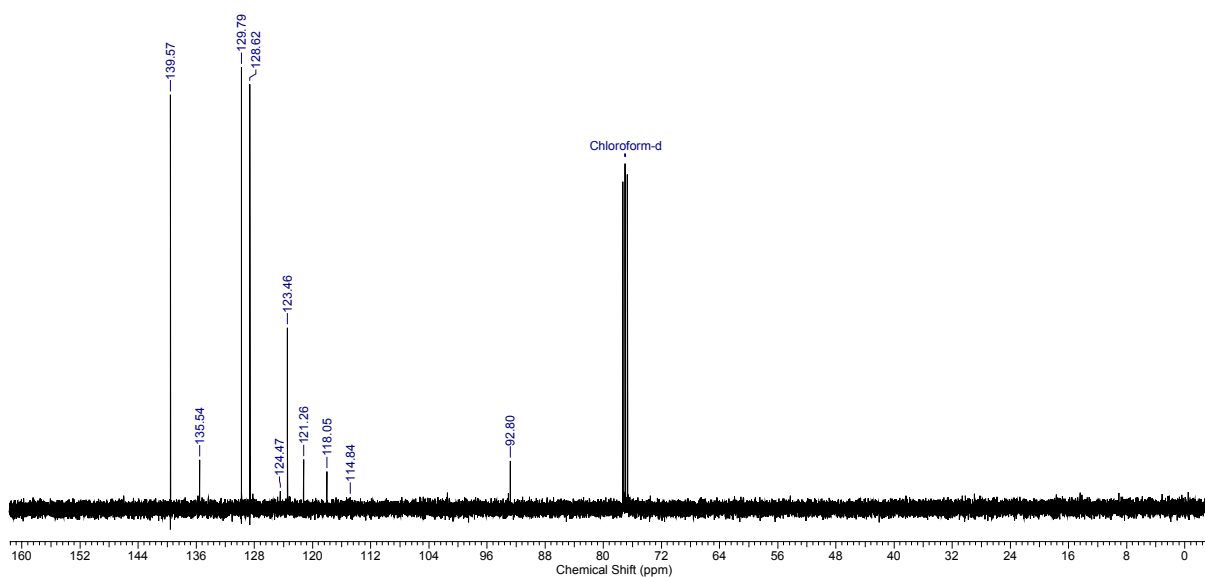

***N*-(2-Iodo-phenyl)-4-methyl-benzenesulfonamide (2f)**

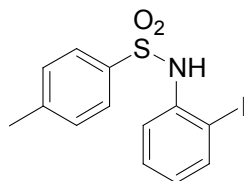

2-Iodoaniline (2.19 g, 10.0 mmol) was dissolved in dry THF (20 mL) under N<sub>2</sub>, followed by addition of pyridine (2.5 mL) and *p*-tosyl chloride (2.10 g, 11.0 mmol). The reaction mixture was stirred for 2 d at rt. After completion of the reaction, EtOAc (30 mL) was added and the solution washed twice with 1 M HCl (20 mL), the aqueous phase extracted with EtOAc (3 x 20 mL). The combined organic layers were washed with sat. NaHCO<sub>3</sub> solution (20 mL), with brine (20 mL), dried over Na<sub>2</sub>SO<sub>4</sub> and concentrated *in vacuo*. The residue was then purified by flash chromatography (pentane/diethyl ether = 7:1) and provided **2f** as a yellow solid (2.72 g, 73 %).

**Mp.:** 92.0-92.9 °C.

**<sup>1</sup>H-NMR** ( MHz, CDCl<sub>3</sub>): δ = 7.66-7.60 (m, 4H), 7.32-7.25 (m, 1H), 7.20 (d, *J*= 7.9 Hz, 2H), 6.81 (td, *J*= 7.7, 1.6 Hz, 2H), 2.37 (s, 3H).

**<sup>13</sup>C-NMR** ( MHz, CDCl<sub>3</sub>): δ = 144.2, 139.1, 137.5, 135.9, 129.6, 129.5, 127.4, 126.8, 122.4, 92.3, 21.6.

**MS** (70 eV, EI), *m/z* (%): 372 (85) [M<sup>+</sup>], 218 (45), 155 (38), 139 (27), 91 (100), 65 (17).

**IR** (KBr):  $\tilde{\nu}$  = 3284 (vs), 1593 (w), 1472 (vs), 1392 (m), 1328 (vs), 1155 (vs), 1086 (s), 1014 (m), 909 (m), 817 (m), 708 (m), 659 (m).

**HRMS** for C<sub>13</sub>H<sub>12</sub>INO<sub>2</sub>S (372.9633): found: 372.9649.

***N*-(2-Iodo-phenyl)-4-methyl-benzenesulfonamide (2f)**

|                        |                                                       |                      |                          |                       |             |
|------------------------|-------------------------------------------------------|----------------------|--------------------------|-----------------------|-------------|
| Acquisition Time (sec) | 2.0486                                                | Comment              | Benoit Blank, AK Knochel | Date                  | Feb 23 2006 |
| File Name              | \\srvknoch2\bblch\Spektr\NMR\300 MHz\bbl018_Proton_01 |                      |                          | Frequency (MHz)       | 300.10      |
| Nucleus                | <sup>1</sup> H                                        | Number of Transients | 8                        | Original Points Count | 9849        |
| Pulse Sequence         | s2pul                                                 | Solvent              | CHLOROFORM-D             | Points Count          | 16384       |
| Temperature (degree C) | 27.000                                                |                      |                          | Sweep Width (Hz)      | 4807.69     |

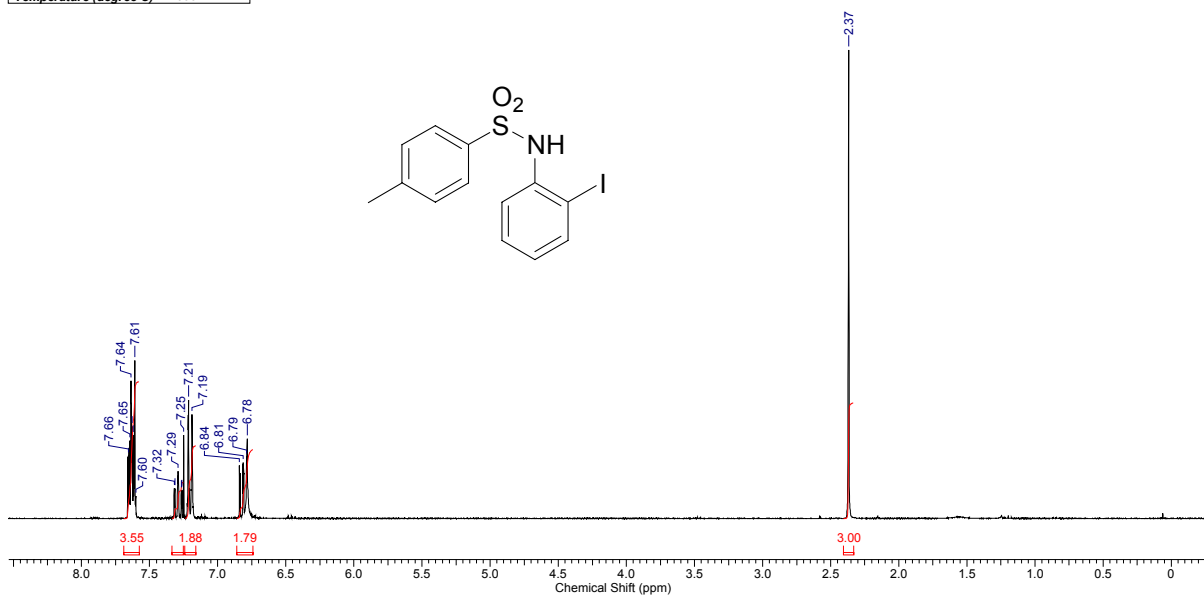

|                        |                                                       |                      |                          |                       |             |
|------------------------|-------------------------------------------------------|----------------------|--------------------------|-----------------------|-------------|
| Acquisition Time (sec) | 1.6010                                                | Comment              | Benoit Blank, AK Knochel | Date                  | Mar 14 2006 |
| File Name              | \\srvknoch2\bblch\Spektr\NMR\300 MHz\bbl035_Carbon_01 |                      |                          | Frequency (MHz)       | 75.47       |
| Nucleus                | <sup>13</sup> C                                       | Number of Transients | 1024                     | Original Points Count | 29004       |
| Pulse Sequence         | s2pul                                                 | Solvent              | CHLOROFORM-D             | Points Count          | 32768       |
| Temperature (degree C) | 27.000                                                |                      |                          | Sweep Width (Hz)      | 18115.94    |

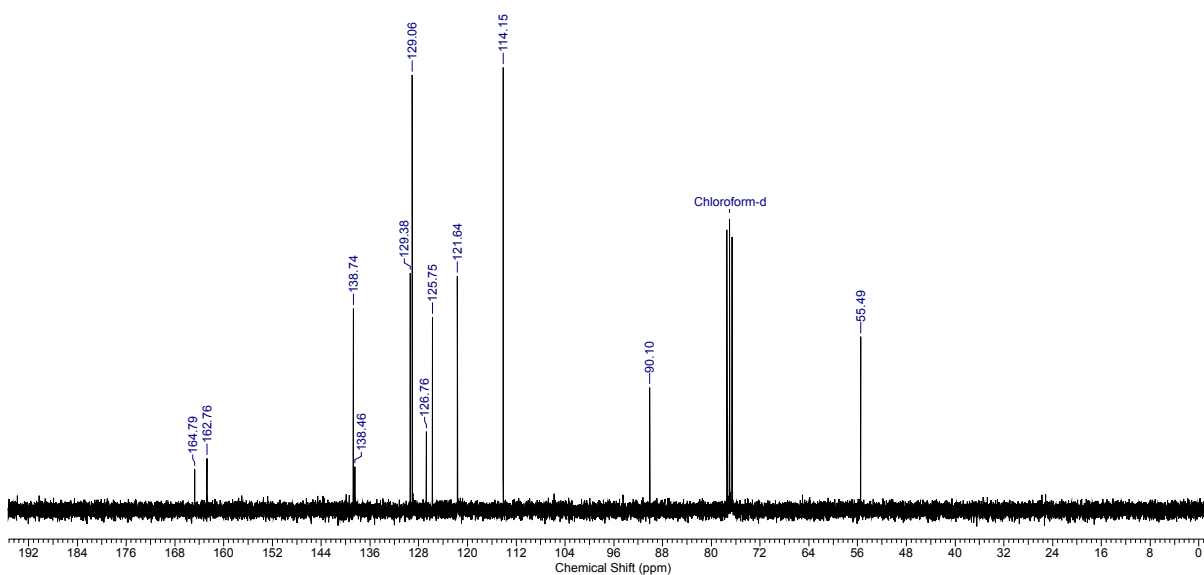



**2,2,2-Trifluoro-*N*-(4'-methoxybiphenyl-2-yl)acetamide (3a)**

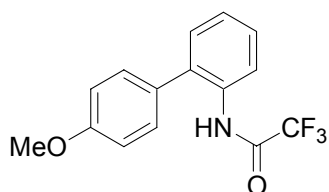

Prepared according to **TP 1** from 4-methoxyphenylmagnesium bromide (3.5 mL, 3.0 mmol, 0.86 M in THF), CuCN·2LiCl (2.8 mL, 2.8 mmol, 1.0 M in THF), Fe(acac)<sub>3</sub> (35 mg, 10 mol%) and 2,2,2-trifluoro-*N*-(2-iodo-phenyl)-acetamide (315 mg, 1.00 mmol). Reaction time: 5 h. Purification by flash chromatography (pentane/diethyl ether = 39:1) yielded biphenyl **3a** as a pale ocher solid (174 mg, 55 %).

**Mp.:** 86.3-87.4 °C.

**<sup>1</sup>H-NMR** (300 MHz, CDCl<sub>3</sub>): δ = 8.28 (d, *J*= 8.2 Hz, 1H), 8.00 (s<sub>br</sub>, 1H), 7.44-7.33 (m, 1H), 7.28 (d, *J*= 8.2 Hz, 4H), 7.03 (d, *J*= 8.2 Hz, 2H), 3.87 (s, 3H).

**<sup>13</sup>C-NMR** (75 MHz, CDCl<sub>3</sub>): δ = 159.8, 154.5 (q, *J*= 37.0 Hz), 132.8, 132.3, 130.4, 130.2, 128.7, 128.4, 126.1, 121.1, 115.6 (q, *J*= 299.6 Hz), 114.8, 55.4.

**MS** (70 eV, EI), *m/z* (%): 295 (100) [M<sup>+</sup>], 226 (12), 208 (10), 183 (16), 154 (15), 127 (5).

**IR** (KBr):  $\tilde{\nu}$  = 3286 (w), 2838 (w), 1722 (m), 1606 (w), 1541 (w), 1516 (w), 1441 (w), 1273 (m), 1239 (m), 1201 (m), 1183 (m), 1144 (vs), 1034 (m), 1018 (m), 906 (m), 832 (m), 765 (vs), 729 (m).

**HRMS** for C<sub>15</sub>H<sub>12</sub>F<sub>3</sub>NO<sub>2</sub> (295.0820): found: 295.0802.

**2,2,2-Trifluoro-*N*-(4'-methoxybiphenyl-2-yl)acetamide (3a)**

|                        |                                                         |                      |                          |                       |             |
|------------------------|---------------------------------------------------------|----------------------|--------------------------|-----------------------|-------------|
| Acquisition Time (sec) | 2.0486                                                  | Comment              | Benoit Blank, AK Knochel | Date                  | Feb 27 2006 |
| File Name              | \\srvknoch2\bblch\Spektren\NMR\300 MHz\bbl024_Proton_01 |                      |                          | Frequency (MHz)       | 300.10      |
| Nucleus                | <sup>1</sup> H                                          | Number of Transients | 8                        | Original Points Count | 9849        |
| Pulse Sequence         | s2pul                                                   | Solvent              | CHLOROFORM-D             | Points Count          | 16384       |
| Temperature (degree C) | 27.000                                                  |                      |                          | Sweep Width (Hz)      | 4807.69     |

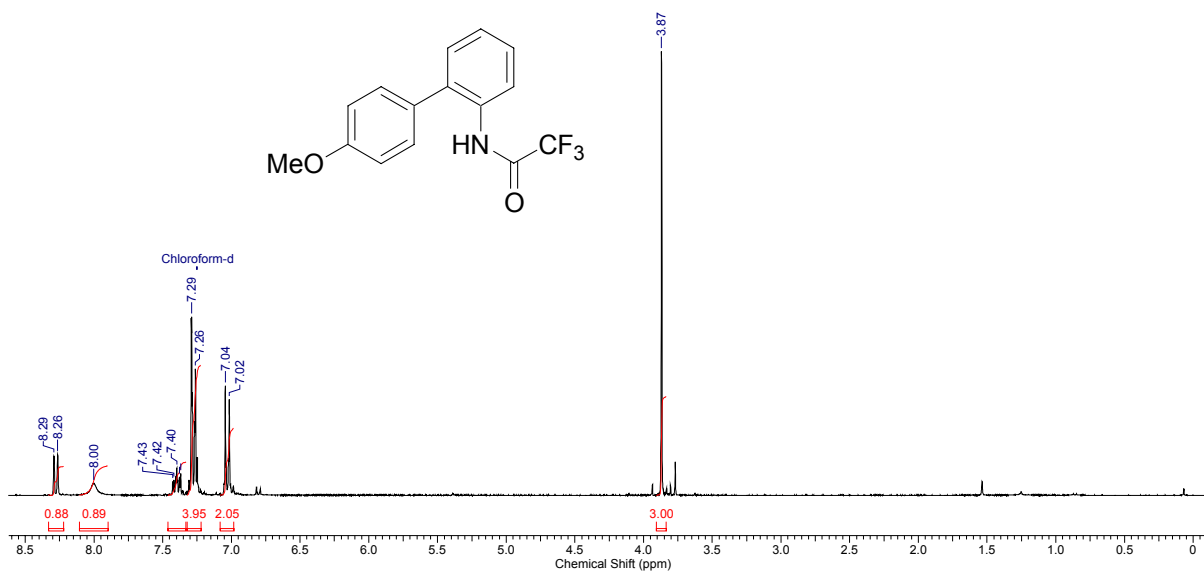

|                        |                                                         |                      |                          |                       |             |
|------------------------|---------------------------------------------------------|----------------------|--------------------------|-----------------------|-------------|
| Acquisition Time (sec) | 1.3005                                                  | Comment              | Benoit Blank, AK Knochel | Date                  | Feb 27 2006 |
| File Name              | \\srvknoch2\bblch\Spektren\NMR\300 MHz\bbl024_Carbon_01 |                      |                          | Frequency (MHz)       | 75.47       |
| Nucleus                | <sup>13</sup> C                                         | Number of Transients | 5000                     | Original Points Count | 23560       |
| Pulse Sequence         | s2pul                                                   | Solvent              | CHLOROFORM-D             | Points Count          | 32768       |
| Temperature (degree C) | 27.000                                                  |                      |                          | Sweep Width (Hz)      | 18115.94    |

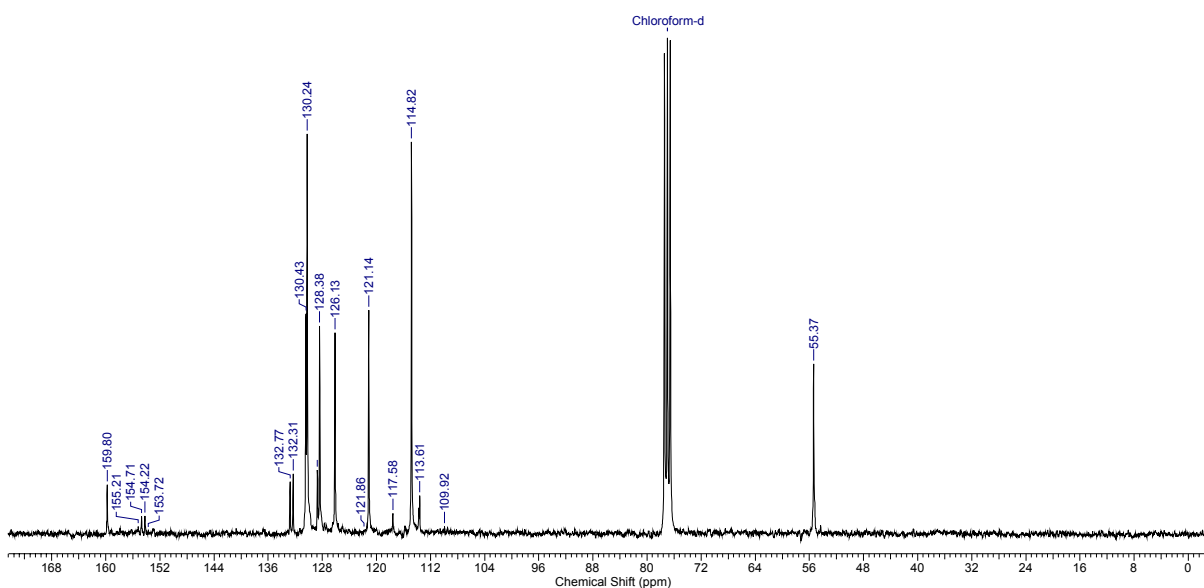

***N*-(4'-Methoxy-biphenyl-2-yl)-acetamide (3b)**

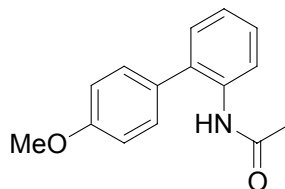

Prepared according to **TP 1** from 4-methoxyphenylmagnesium bromide (3.5 mL, 3.0 mmol, 0.86 M in THF), CuCN·2LiCl (2.8 mL, 2.8 mmol, 1.0 M in THF), Fe(acac)<sub>3</sub> (35 mg, 10 mol%) and *N*-(2-iodo-phenyl)-acetamide (261 mg, 1.00 mmol). Reaction time: 4 h. Purification by flash chromatography (pentane/diethyl ether = 1:3) yielded biphenyl **3b** as a yellow solid (179 mg, 74 %).

**Mp.:** 133.9-135.1 °C.

**<sup>1</sup>H-NMR** (300 MHz, CDCl<sub>3</sub>): δ = 8.24 (d, *J* = 7.9 Hz, 1H), 7.34 (dd, *J* = 7.6, 2.0 Hz, 1H), 7.28 (td, *J* = 8.8, 2.5 Hz, 2H), 7.23-7.11 (m, 3H), 7.00 (td, *J* = 8.8, 2.5 Hz, 2H), 3.86 (s, 3H), 2.01 (s, 3H).

**<sup>13</sup>C-NMR** (75 MHz, CDCl<sub>3</sub>): δ = 168.1, 159.3, 134.9, 131.8, 130.4, 130.2, 130.1, 128.1, 124.2, 121.5, 114.5, 55.3, 24.6.

**MS** (70 eV, EI), *m/z* (%): 241 (65) [M<sup>+</sup>], 199 (100), 184 (28), 167 (7), 154 (12), 128 (5).

**IR** (KBr):  $\tilde{\nu}$  = 3350 (m), 3012 (w), 2841 (w), 1690 (m), 1609 (w), 1512 (s), 1472 (m), 1439 (m), 1362 (m), 1294 (m), 1239 (s), 1031 (m), 1015 (m), 832 (m), 773 (vs), 663 (m).

**HRMS** for C<sub>15</sub>H<sub>15</sub>NO<sub>2</sub> (241.1103): found: 241.1089.

***N*-(4'-Methoxy-biphenyl-2-yl)-acetamide (3b)**

|                        |                                                         |                      |                          |                       |             |
|------------------------|---------------------------------------------------------|----------------------|--------------------------|-----------------------|-------------|
| Acquisition Time (sec) | 2.0486                                                  | Comment              | Benoit Blank, AK Knochel | Date                  | Feb 23 2006 |
| File Name              | \\srvknoch2\bblch\Spektren\NMR\300 MHz\bbl011_Proton_01 |                      |                          | Frequency (MHz)       | 300.10      |
| Nucleus                | <sup>1</sup> H                                          | Number of Transients | 8                        | Original Points Count | 9849        |
| Pulse Sequence         | s2pul                                                   | Solvent              | CHLOROFORM-D             | Points Count          | 16384       |
| Temperature (degree C) | 27.000                                                  |                      |                          | Sweep Width (Hz)      | 4807.69     |

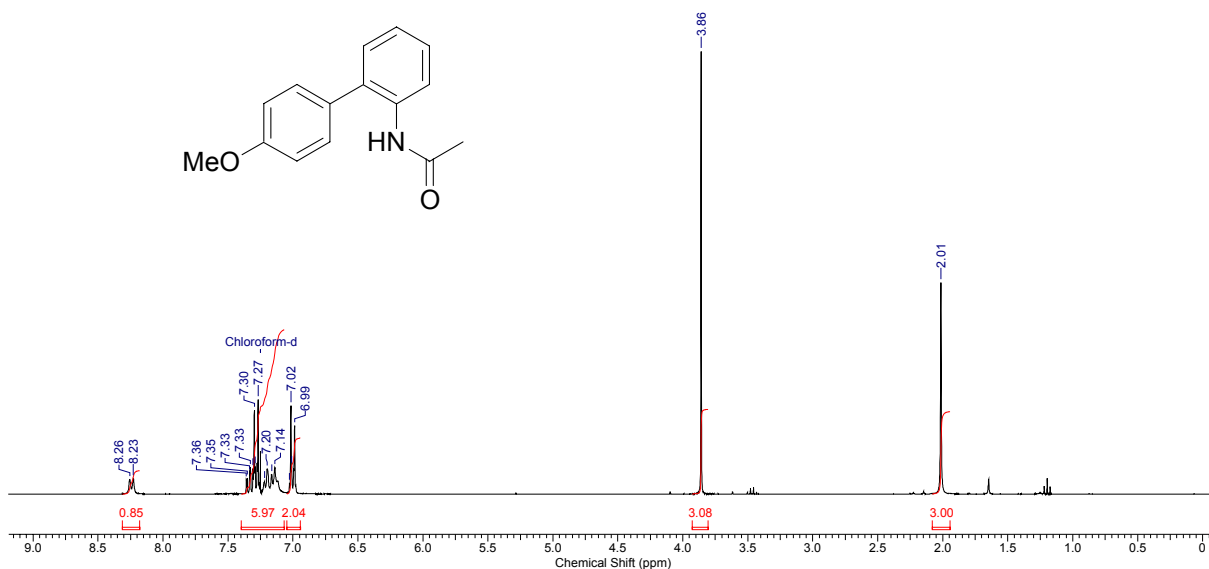

|                        |                                                         |                      |                          |                       |             |
|------------------------|---------------------------------------------------------|----------------------|--------------------------|-----------------------|-------------|
| Acquisition Time (sec) | 1.3005                                                  | Comment              | Benoit Blank, AK Knochel | Date                  | Feb 23 2006 |
| File Name              | \\srvknoch2\bblch\Spektren\NMR\300 MHz\bbl011_Carbon_01 |                      |                          | Frequency (MHz)       | 75.47       |
| Nucleus                | <sup>13</sup> C                                         | Number of Transients | 2000                     | Original Points Count | 23560       |
| Pulse Sequence         | s2pul                                                   | Solvent              | CHLOROFORM-D             | Points Count          | 32768       |
| Temperature (degree C) | 27.000                                                  |                      |                          | Sweep Width (Hz)      | 18115.94    |

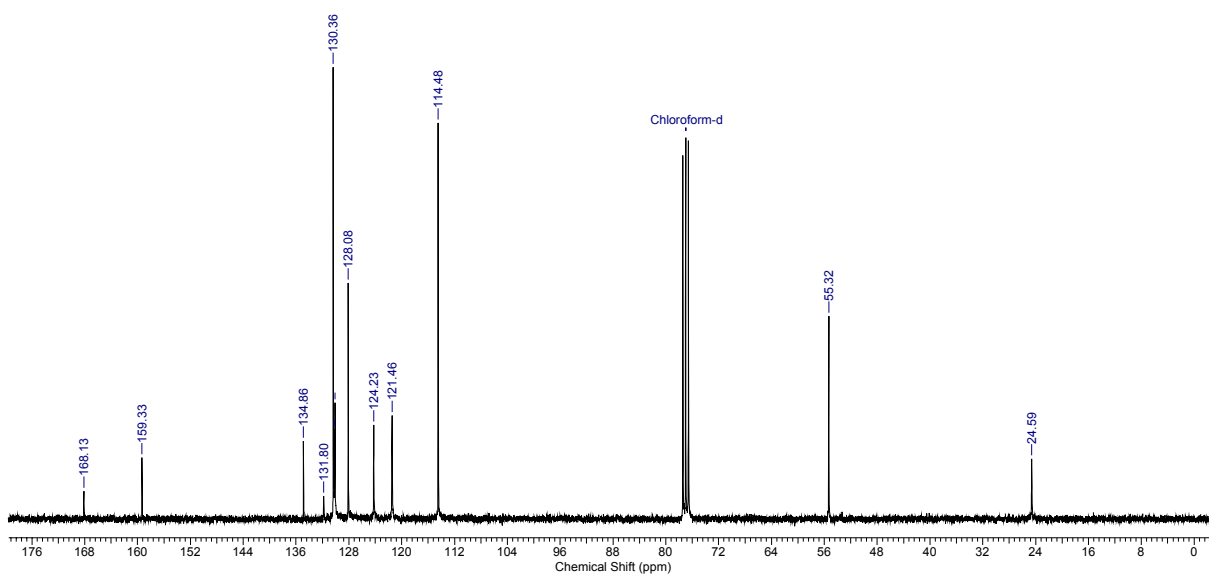

***N*-(4'-Methoxy-biphenyl-2-yl)-benzamide (3c)**

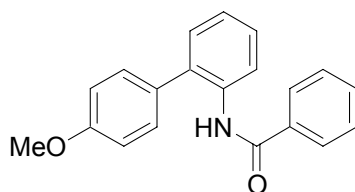

Prepared according to **TP 1** from 4-methoxyphenylmagnesium bromide (3.5 mL, 3.0 mmol, 0.86 M in THF), CuCN·2LiCl (2.8 mL, 2.8 mmol, 1.0 M in THF), Fe(acac)<sub>3</sub> (35 mg, 10 mol%) and *N*-(2-iodo-phenyl)-benzamide (323 mg, 1.00 mmol). Reaction time: 4 h. Purification by flash chromatography (pentane/diethyl ether = 4:1) yielded biphenyl **3c** as a yellow solid (257 mg, 85 %).

**Mp.:** 90.1-92.8 °C.

**<sup>1</sup>H-NMR** (300 MHz, CDCl<sub>3</sub>): δ = 8.42 (d, *J* = 8.2 Hz, 1H), 7.92 (s<sub>br</sub>, 1H), 7.54 (d, *J* = 6.8 Hz, 2H), 7.39-7.25 (m, 6H), 7.18 (dd, *J* = 7.6, 2.2 Hz, 1H), 7.09 (t, *J* = 7.5 Hz, 1H), 6.93 (d, *J* = 8.2 Hz, 2H), 3.77 (s, 3H).

**<sup>13</sup>C-NMR** (75 MHz, CDCl<sub>3</sub>): δ = 164.9, 159.5, 135.1, 134.8, 132.0, 131.7, 131.3, 130.5, 130.1, 128.7, 128.3, 126.8, 124.3, 121.1, 114.6, 55.4.

**MS** (70 eV, EI), *m/z* (%): 303 (73) [M<sup>+</sup>], 286 (2), 198 (3), 154 (5), 105 (100), 77 (25).

**IR** (KBr):  $\tilde{\nu}$  = 3235 (m), 3056 (w), 3001 (w), 2836 (w), 1648 (m), 1635 (vs), 1571 (m), 1529 (s), 1514 (vs), 1491 (m), 1449 (s), 1311 (m), 1295 (m), 1255 (vs), 1176 (m), 1036 (m), 829 (m), 752 (m), 694 (m).

**HRMS** for C<sub>20</sub>H<sub>17</sub>NO<sub>2</sub> (303.1259): found: 303.1263.

***N*-(4'-Methoxy-biphenyl-2-yl)-benzamide (3c)**

|                        |                                                      |                      |                          |                       |             |
|------------------------|------------------------------------------------------|----------------------|--------------------------|-----------------------|-------------|
| Acquisition Time (sec) | 2.0486                                               | Comment              | Benoit Blank, AK Knochel | Date                  | Feb 28 2006 |
| File Name              | \srnknoch2\bblch\Spektr\NMR\300 MHz\bbl022_Proton_01 |                      |                          | Frequency (MHz)       | 300.10      |
| Nucleus                | <sup>1</sup> H                                       | Number of Transients | 8                        | Original Points Count | 9849        |
| Pulse Sequence         | s2pul                                                | Solvent              | CHLOROFORM-D             | Points Count          | 16384       |
| Temperature (degree C) | 27.000                                               |                      |                          | Sweep Width (Hz)      | 4807.69     |

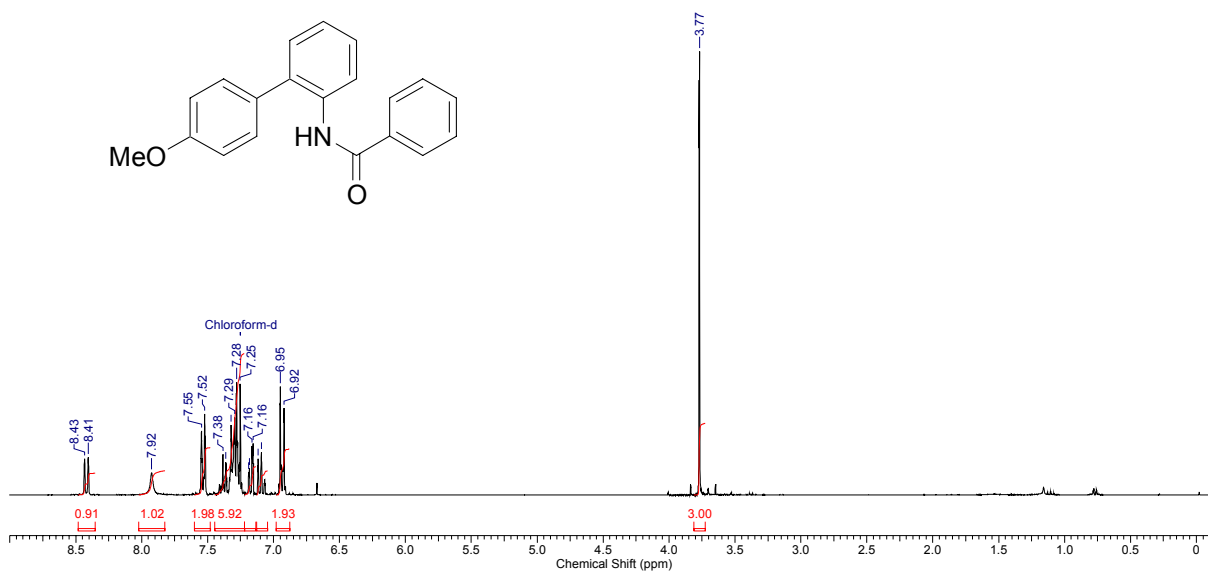

|                        |                                                      |                      |                          |                       |             |
|------------------------|------------------------------------------------------|----------------------|--------------------------|-----------------------|-------------|
| Acquisition Time (sec) | 1.3005                                               | Comment              | Benoit Blank, AK Knochel | Date                  | Feb 28 2006 |
| File Name              | \srnknoch2\bblch\Spektr\NMR\300 MHz\bbl022_Carbon_01 |                      |                          | Frequency (MHz)       | 75.47       |
| Nucleus                | <sup>13</sup> C                                      | Number of Transients | 2000                     | Original Points Count | 23560       |
| Pulse Sequence         | s2pul                                                | Solvent              | CHLOROFORM-D             | Points Count          | 32768       |
| Temperature (degree C) | 27.000                                               |                      |                          | Sweep Width (Hz)      | 18115.94    |

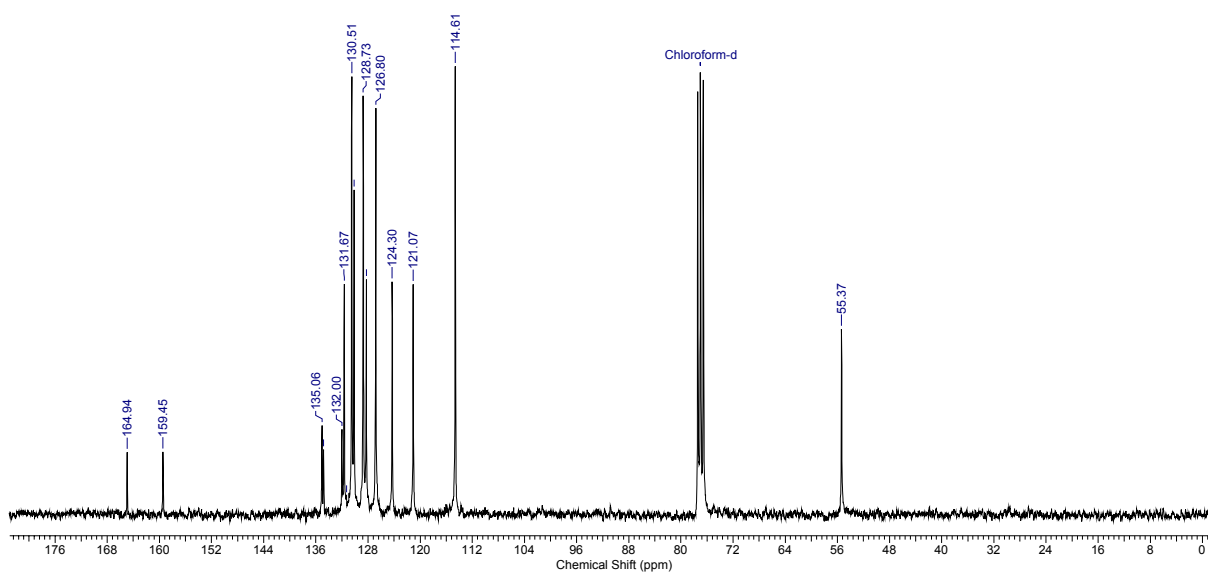

**4-Methoxy-*N*-(4'-methoxybiphenyl-2-yl)benzamide (3d)**

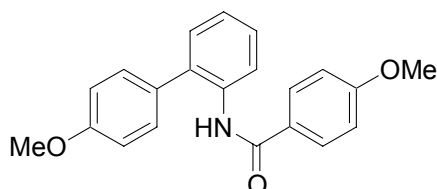

Prepared according to **TP 1** from 4-methoxyphenylmagnesium bromide (3.5 mL, 3.0 mmol, 0.86 M in THF), CuCN·2LiCl (2.8 mL, 2.8 mmol, 1.0 M in THF), Fe(acac)<sub>3</sub> (35 mg, 10 mol%) and *N*-(2-iodo-phenyl)-4-methoxy-benzamide (353 mg, 1.00 mmol). Reaction time: 7 h. Purification by flash chromatography (pentane/diethyl ether = 2:1) yielded biphenyl **3d** as a colorless solid (305 mg, 92 %).

**Mp.:** 149.1-149.8 °C.

**<sup>1</sup>H-NMR** (300 MHz, CDCl<sub>3</sub>): δ = 8.51 (d, *J* = 8.1 Hz, 1H), 7.94 (s<sub>br</sub>, 1H), 7.59 (d, *J* = 8.8 Hz, 2H), 7.43-7.33 (m, 3H), 7.27-7.24 (m, 1H), 7.17 (td, *J* = 7.4, 1.0 Hz, 1H), 7.03 (d, *J* = 8.8 Hz, 2H), 6.88 (d, *J* = 8.8 Hz, 2H), 3.87 (s, 3H), 3.83 (s, 3H).

**<sup>13</sup>C-NMR** (75 MHz, CDCl<sub>3</sub>): δ = 164.5, 162.3, 159.4, 135.2, 131.8, 130.5, 130.3, 130.1, 128.7, 128.2, 127.1, 124.0, 121.0, 114.6, 113.9, 55.4, 55.3.

**MS** (70 eV, EI), *m/z* (%): 333 (32) [M<sup>+</sup>], 135 (100), 92 (4), 77 (6).

**IR** (KBr):  $\tilde{\nu}$  = 3301 (w), 3015 (w), 2961 (w), 2836 (w), 1638 (m), 1607 (m), 1519 (m), 1494 (s), 1463 (m), 1438 (m), 1291 (m), 1241 (vs), 1176 (s), 1023 (s), 1001 (m), 913 (w), 833 (s), 800 (w), 758 (vs).

**HRMS** for C<sub>21</sub>H<sub>19</sub>NO<sub>3</sub> (333.1365): found: 333.1340.

**4-Methoxy-N-(4'-methoxybiphenyl-2-yl)benzamide (3d)**

|                        |                                                       |                      |                          |                       |             |
|------------------------|-------------------------------------------------------|----------------------|--------------------------|-----------------------|-------------|
| Acquisition Time (sec) | 4.1943                                                | Comment              | Benoit Blank, AK Knochel | Date                  | Mar 27 2006 |
| File Name              | \\srnknoch2\bblch\Spektr\NMR\300 MHz\bbl041_Proton_01 |                      |                          | Frequency (MHz)       | 300.10      |
| Nucleus                | <sup>1</sup> H                                        | Number of Transients | 8                        | Original Points Count | 16384       |
| Pulse Sequence         | s2pul                                                 | Solvent              | CHLOROFORM-D             | Points Count          | 16384       |
| Temperature (degree C) | 27.000                                                |                      |                          | Sweep Width (Hz)      | 3906.25     |

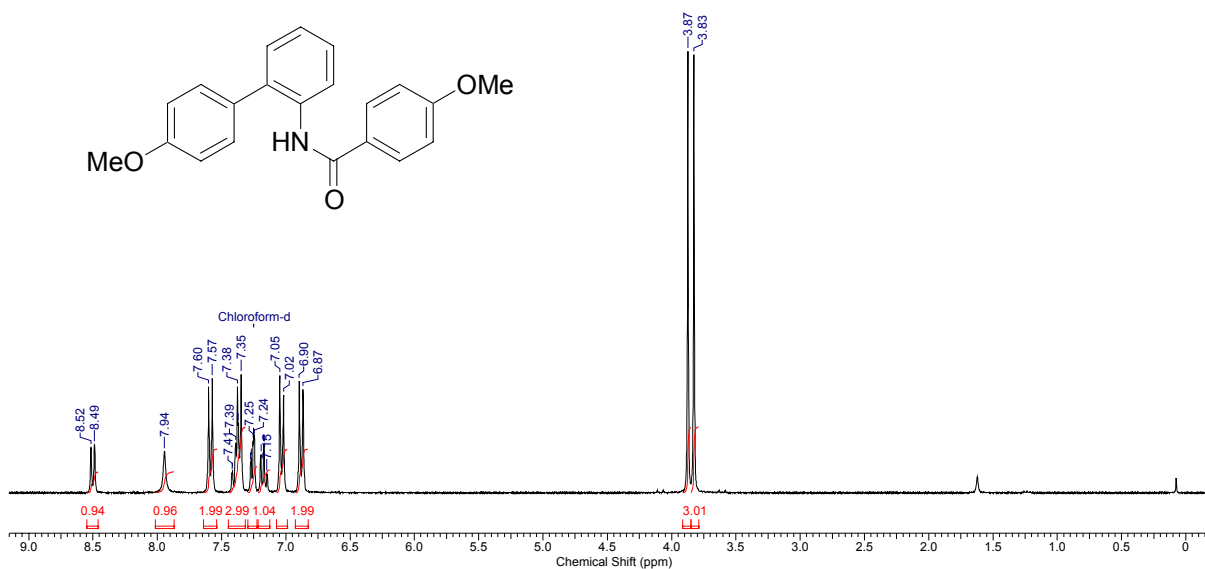

|                        |                                                         |                      |                          |                       |             |
|------------------------|---------------------------------------------------------|----------------------|--------------------------|-----------------------|-------------|
| Acquisition Time (sec) | 1.6010                                                  | Comment              | Benoit Blank, AK Knochel | Date                  | Mar 27 2006 |
| File Name              | \\srnknoch2\bblch\Spektr\NMR\300 MHz\bbl041_Carbon2k_01 |                      |                          | Frequency (MHz)       | 75.47       |
| Nucleus                | <sup>13</sup> C                                         | Number of Transients | 2048                     | Original Points Count | 29004       |
| Pulse Sequence         | s2pul                                                   | Solvent              | CHLOROFORM-D             | Points Count          | 32768       |
| Temperature (degree C) | 27.000                                                  |                      |                          | Sweep Width (Hz)      | 18115.94    |

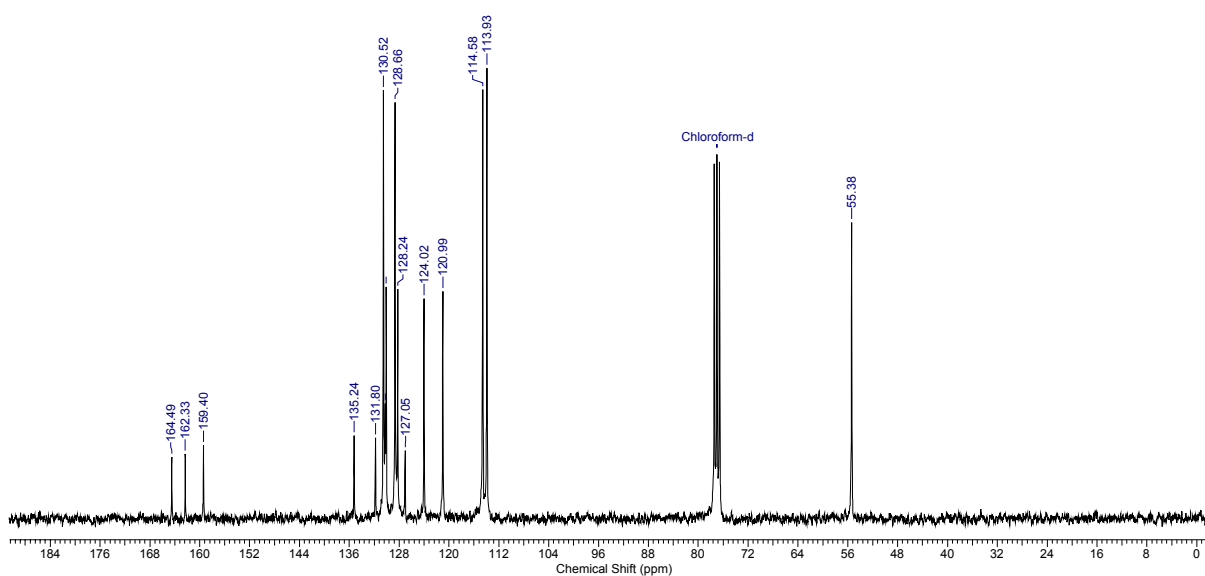



**1,1,1-Trifluoro-*N*-(4'-methoxybiphenyl-2-yl)methanesulfonamide (3e)**

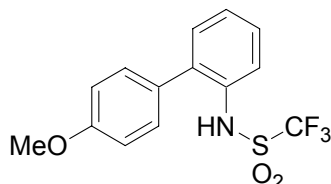

Prepared according to **TP 1** from 4-methoxyphenylmagnesium bromide (3.3 mL, 3.0 mmol, 0.9 M in THF), CuCN·2LiCl (2.8 mL, 2.8 mmol, 1.0 M in THF), Fe(acac)<sub>3</sub> (35 mg, 10 mol%) and 1,1,1-trifluoro-*N*-(2-iodophenyl)methanesulfonamide (351 mg, 1.00 mmol). Reaction time: 5 h. Purification by flash chromatography (pentane/diethyl ether = 5:1) yielded biphenyl **3e** as a brown solid (225 mg, 68 %).

**Mp.:** 78.3-79.9 °C.

**<sup>1</sup>H-NMR** (400 MHz, CDCl<sub>3</sub>): δ = 7.59 (dt, *J* = 8.1, 0.9 Hz, 1H), 7.38-7.32 (m, 1H), 7.26 (dd, *J* = 1.8, 0.8 Hz, 1H), 7.25 (s, 1H), 7.24-7.20 (m, 2H), 7.02-6.98 (m, 2H), 3.86 (s, 3H).

**<sup>13</sup>C-NMR** (MHz, CDCl<sub>3</sub>): δ = 159.8, 134.2, 131.8, 130.9, 130.3, 128.7, 126.4, 123.7, 121.1, 116.9 (q, *J* = 192.6 Hz), 114.8, 55.4.

**MS** (70 eV, EI), *m/z* (%): 331 (73) [M<sup>+</sup>], 198 (100), 183 (30), 167 (30), 154 (23), 127 (5).

**IR** (KBr):  $\tilde{\nu}$  = 3158 (w), 1615 (w), 1604 (w), 1519 (w), 1486 (m), 1433 (m), 1372 (m), 1238 (m), 1229 (m), 1189 (vs), 1139 (s), 1108 (m), 1018 (m), 943 (m), 833 (m), 755 (m), 745 (m).

**HRMS** for C<sub>14</sub>H<sub>12</sub>F<sub>3</sub>NO<sub>3</sub>S (331.0490): found: 331.0493.

**1,1,1-Trifluoro-*N*-(4'-methoxybiphenyl-2-yl)methanesulfonamide (3e)**

|                        |                                                         |                      |                          |                       |             |
|------------------------|---------------------------------------------------------|----------------------|--------------------------|-----------------------|-------------|
| Acquisition Time (sec) | 4.0000                                                  | Comment              | Benoit Blank, AK Knochel | Date                  | Apr 21 2006 |
| File Name              | \\srvknoch2\bblch\Spektren\NMR\400 MHz\bbl073_Proton_01 |                      |                          | Frequency (MHz)       | 399.94      |
| Nucleus                | <sup>1</sup> H                                          | Number of Transients | 16                       | Original Points Count | 20797       |
| Pulse Sequence         | s2pul                                                   | Solvent              | CHLOROFORM-D             | Points Count          | 32768       |
| Temperature (degree C) | 30.000                                                  |                      |                          | Sweep Width (Hz)      | 5199.19     |

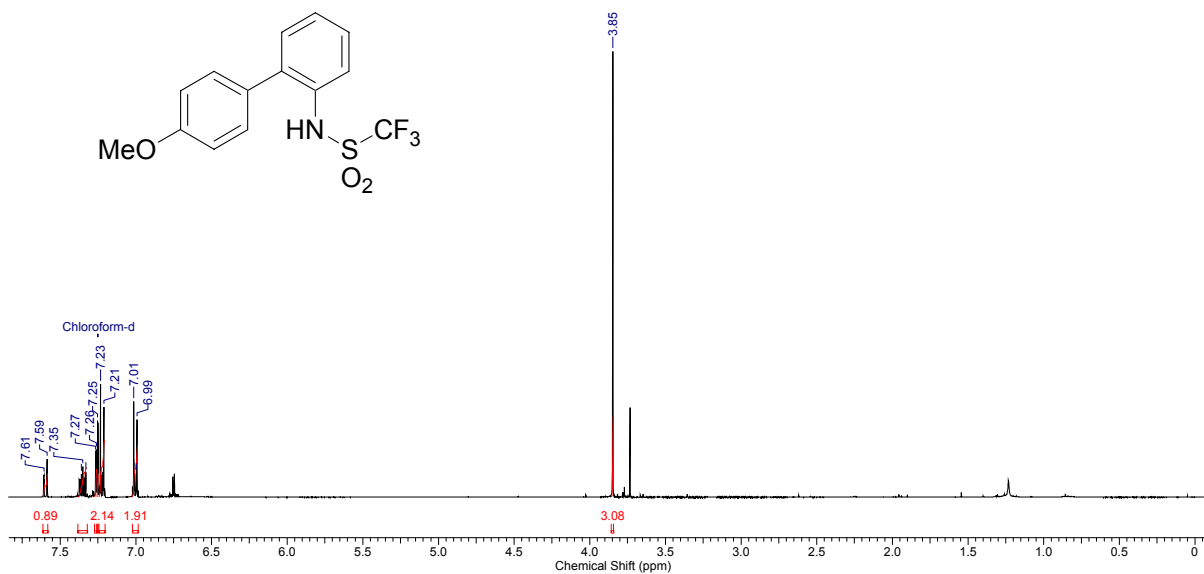

|                        |                                                         |                      |                          |                       |             |
|------------------------|---------------------------------------------------------|----------------------|--------------------------|-----------------------|-------------|
| Acquisition Time (sec) | 1.6000                                                  | Comment              | Benoit Blank, AK Knochel | Date                  | Apr 21 2006 |
| File Name              | \\srvknoch2\bblch\Spektren\NMR\400 MHz\bbl073_Carbon_01 |                      |                          | Frequency (MHz)       | 100.58      |
| Nucleus                | <sup>13</sup> C                                         | Number of Transients | 8192                     | Original Points Count | 38612       |
| Pulse Sequence         | s2pul                                                   | Solvent              | CHLOROFORM-D             | Points Count          | 65536       |
| Temperature (degree C) | 30.000                                                  |                      |                          | Sweep Width (Hz)      | 24132.73    |

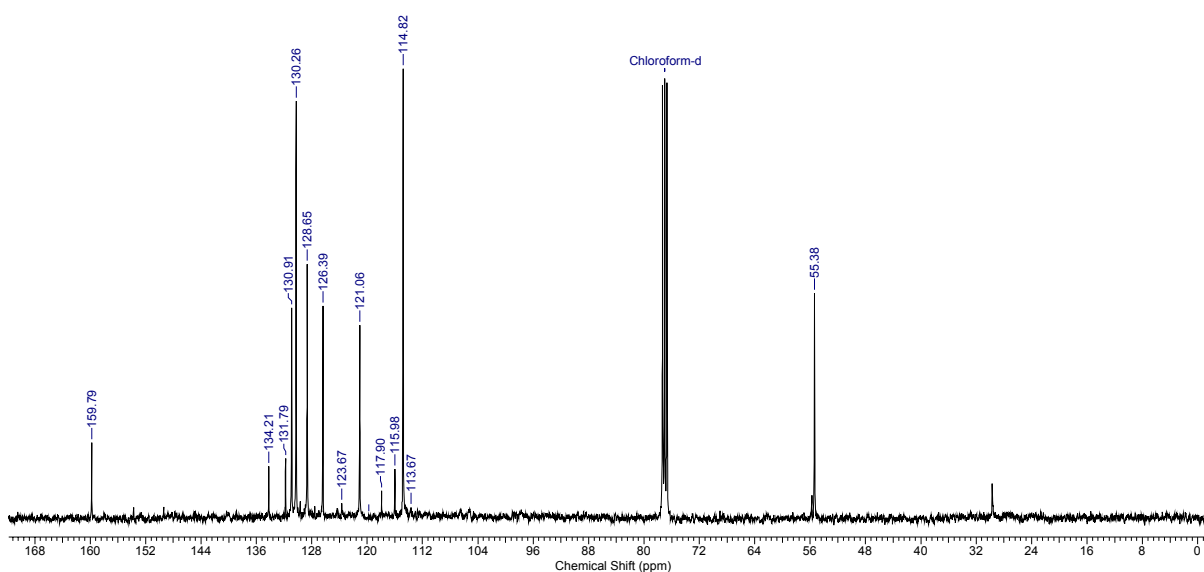

***N*-(4'-Methoxybiphenyl-2-yl)-4-methylbenzenesulfonamide (3f)**

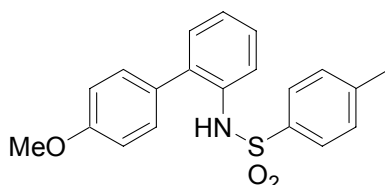

Prepared according to **TP 1** from 4-methoxyphenylmagnesium bromide (3.5 mL, 3.0 mmol, 0.86 M in THF), CuCN·2LiCl (2.8 mL, 2.8 mmol, 1.0 M in THF), Fe(acac)<sub>3</sub> (35 mg, 10 mol%) and *N*-(2-iodo-phenyl)-4-methyl-benzenesulfonamide (373 mg, 1.00 mmol). Reaction time: 5 h. Purification by flash chromatography (pentane/diethyl ether = 19:1) yielded biphenyl **3f** as a pale brown solid (297 mg, 84 %).

**Mp.:** 107.2-109.3 °C.

**<sup>1</sup>H-NMR** (300 MHz, CDCl<sub>3</sub>): δ = 7.68 (dd, *J* = 7.6, 1.2 Hz, 1H), 7.49 (dt, *J* = 8.5, 1.9 Hz, 2H), 7.32-7.25 (m, 1H), 7.19 (d, *J* = 8.5 Hz, 2H), 7.13-7.05 (m, 2H), 6.82 (m, 4H), 6.57 (s<sub>br</sub>, 1H), 3.84 (s, 3H), 2.39 (s, 3H).

**<sup>13</sup>C-NMR** (75 MHz, CDCl<sub>3</sub>): δ = 159.4, 143.8, 136.2, 134.0, 133.4, 130.4, 130.1, 129.5, 129.3, 128.4, 127.2, 124.7, 120.9, 114.5, 55.4, 21.5.

**MS** (70 eV, EI), *m/z* (%): 353 (30) [M<sup>+</sup>], 198 (100), 183 (25), 167 (20), 154 (15), 91 (4).

**IR** (KBr):  $\tilde{\nu}$  = 3250 (m), 3039 (w), 1600 (m), 1511 (m), 1485 (m), 1398 (m), 1332 (m), 1300 (m), 1241 (s), 1150 (vs), 1089 (s), 1031 (m), 907 (s), 827 (s), 810 (s), 749 (vs), 665 (vs).

**HRMS** for C<sub>20</sub>H<sub>19</sub>NO<sub>3</sub>S (353.1086): found: 353.1083.

***N*-(4'-Methoxybiphenyl-2-yl)-4-methylbenzenesulfonamide (3f)**

|                        |                                                      |                      |                          |                       |             |
|------------------------|------------------------------------------------------|----------------------|--------------------------|-----------------------|-------------|
| Acquisition Time (sec) | 2.0486                                               | Comment              | Benoit Blank, AK Knochel | Date                  | Feb 27 2006 |
| File Name              | \srnknoch2\bblch\Spektr\NMR\300 MHz\bbl023_Proton_01 |                      |                          | Frequency (MHz)       | 300.10      |
| Nucleus                | <sup>1</sup> H                                       | Number of Transients | 8                        | Original Points Count | 9849        |
| Pulse Sequence         | s2pul                                                | Solvent              | CHLOROFORM-D             | Points Count          | 16384       |
| Temperature (degree C) | 27.000                                               |                      |                          | Sweep Width (Hz)      | 4807.69     |

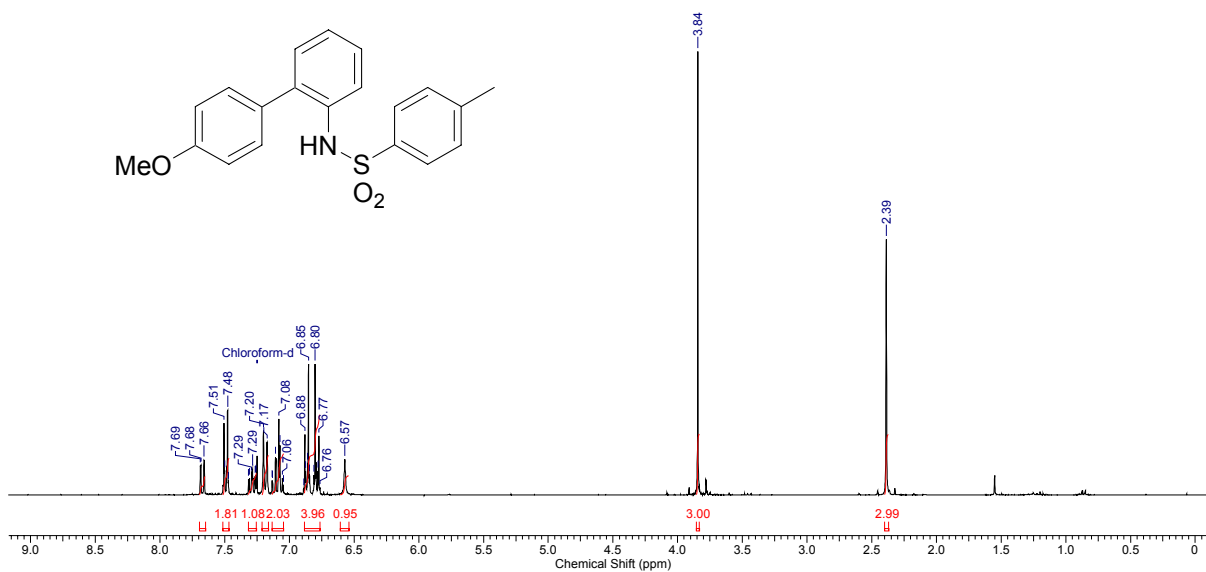

|                        |                                                      |                      |                          |                       |             |
|------------------------|------------------------------------------------------|----------------------|--------------------------|-----------------------|-------------|
| Acquisition Time (sec) | 1.3005                                               | Comment              | Benoit Blank, AK Knochel | Date                  | Feb 27 2006 |
| File Name              | \srnknoch2\bblch\Spektr\NMR\300 MHz\bbl023_Carbon_01 |                      |                          | Frequency (MHz)       | 75.47       |
| Nucleus                | <sup>13</sup> C                                      | Number of Transients | 5000                     | Original Points Count | 23560       |
| Pulse Sequence         | s2pul                                                | Solvent              | CHLOROFORM-D             | Points Count          | 32768       |
| Temperature (degree C) | 27.000                                               |                      |                          | Sweep Width (Hz)      | 18115.94    |

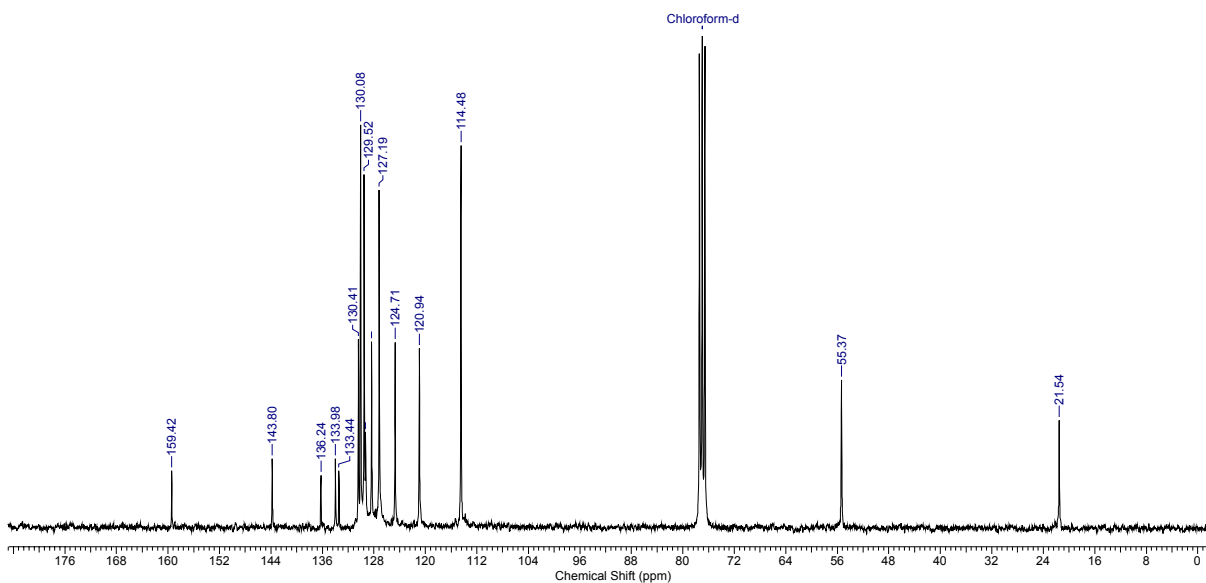

**Ethyl 8-(4-methoxyphenyl)-4-methyl-2-oxo-1,2-dihydroquinoline-6-carboxylate (5a)**

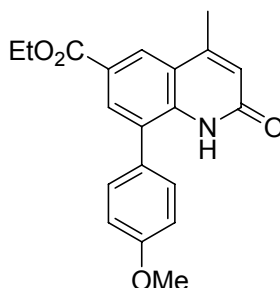

Prepared according to **TP 1** from 4-methoxyphenylmagnesium bromide (1.88 mL, 1.5 mmol, 0.8 M in THF), CuCN·2LiCl (1.4 mL, 1.4 mmol, 1.0 M in THF), Fe(acac)<sub>3</sub> (18 mg, 5 mol %) and ethyl 8-iodo-4-methyl-2-oxo-1,2-dihydroquinoline-6-carboxylate (178 mg, 0.50 mmol). Reaction time: 3 h. Purification by flash chromatography (pentane/EtOAc/MeOH = 4:1:0.1) yielded biphenyl **5a** as a yellow solid (154 mg, 91 %).

**Mp.:** 168-169 °C.

**<sup>1</sup>H-NMR** (300 MHz, CDCl<sub>3</sub>): δ = 8.71 (s\_br, 1H), 8.37 (d, *J* = 1.8 Hz, 1H), 8.04 (d, *J* = 1.9 Hz, 1H), 7.32 (d, *J* = 8.8 Hz, 2H), 7.05 (d, *J* = 8.7 Hz, 2H), 6.54 (d, *J* = 1.0 Hz, 1H), 4.40 (q, *J* = 7.2 Hz, 2H), 3.02 (s, 3H), 2.57 (d, *J* = 1.2 Hz, 3H), 1.40 (t, *J* = 7.1 Hz, 3H).

**<sup>13</sup>C-NMR** (75 MHz, CDCl<sub>3</sub>): δ = 166.0, 161.9, 160.1, 149.3, 138.5, 131.9, 130.5, 128.6, 127.3, 126.0, 124.2, 121.5, 120.3, 115.1, 61.2, 55.5, 19.5, 14.4.

**MS** (70 eV, EI), *m/z* (%): 337 (100) [M<sup>+</sup>], 336 (56), 322 (8), 308 (13), 292 (14).

**IR** (KBr):  $\tilde{\nu}$  = 2982 (w), 1715 (m), 1660 (s), 1597 (m), 1514 (m), 1464 (w), 1395 (w), 1297 (m), 1250 (s), 1179 (w), 1072 (w), 1028 (w), 964 (w), 909 (w), 865 (w), 834 (w), 766 (w), 592 (w).

**HRMS** for C<sub>20</sub>H<sub>19</sub>NO<sub>4</sub> (337.1314): found: 337.1307.

**Ethyl 8-(4-methoxyphenyl)-4-methyl-2-oxo-1,2-dihydroquinoline-6-carboxylate (5a)**

|                        |                                                               |                       |                                       |                        |                      |
|------------------------|---------------------------------------------------------------|-----------------------|---------------------------------------|------------------------|----------------------|
| Acquisition Time (sec) | 2.2610                                                        | Comment               | Ak Knochel User Kofink Bruker ARX 300 | Date                   | 14 Nov 2005 07:36:32 |
| File Name              | I:\Supporting Information - Paper\lcko_ng4\lcko_ng4_001000fid | Frequency (MHz)       | 300.13                                | Nucleus                | <sup>1</sup> H       |
| Number of Transients   | 64                                                            | Original Points Count | 8192                                  | Points Count           | 8192                 |
| Solvent                | CHLOROFORM-D                                                  | Sweep Width (Hz)      | 3623.19                               | Pulse Sequence         | zg30                 |
|                        |                                                               |                       |                                       | Temperature (degree C) | 17.000               |

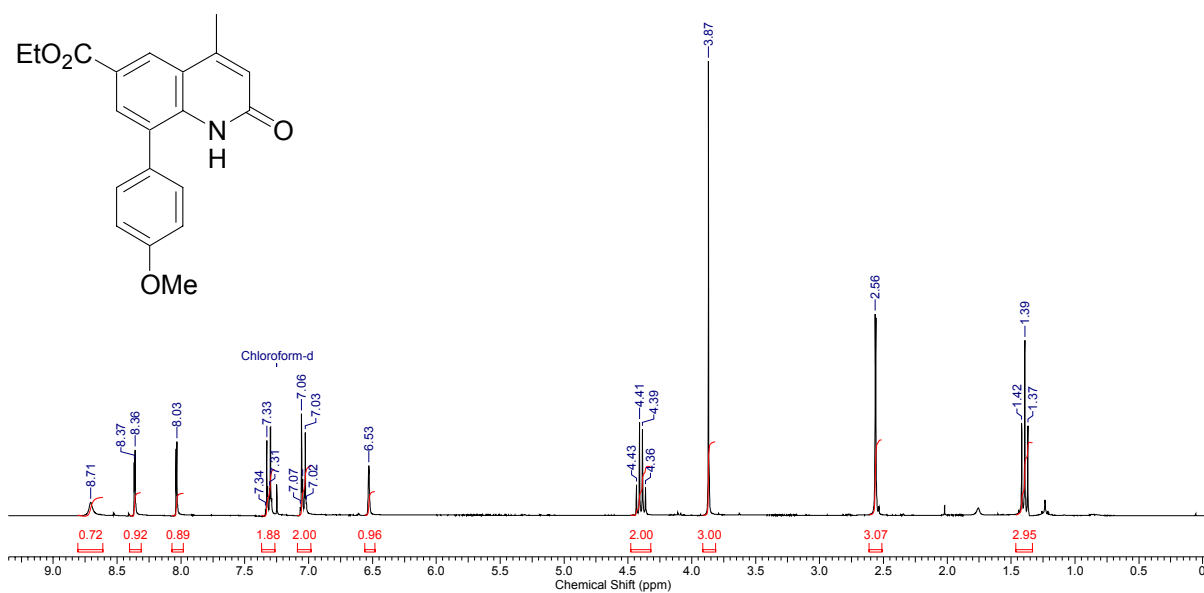

|                        |                                                               |                       |                                       |                        |                      |
|------------------------|---------------------------------------------------------------|-----------------------|---------------------------------------|------------------------|----------------------|
| Acquisition Time (sec) | 1.7039                                                        | Comment               | Ak Knochel User Kofink Bruker ARX 300 | Date                   | 14 Nov 2005 09:06:08 |
| File Name              | I:\Supporting Information - Paper\lcko_ng4\lcko_ng4_002000fid | Frequency (MHz)       | 75.48                                 | Nucleus                | <sup>13</sup> C      |
| Number of Transients   | 1563                                                          | Original Points Count | 32768                                 | Points Count           | 32768                |
| Solvent                | CHLOROFORM-D                                                  | Sweep Width (Hz)      | 19230.77                              | Pulse Sequence         | zgpg30               |
|                        |                                                               |                       |                                       | Temperature (degree C) | 27.000               |

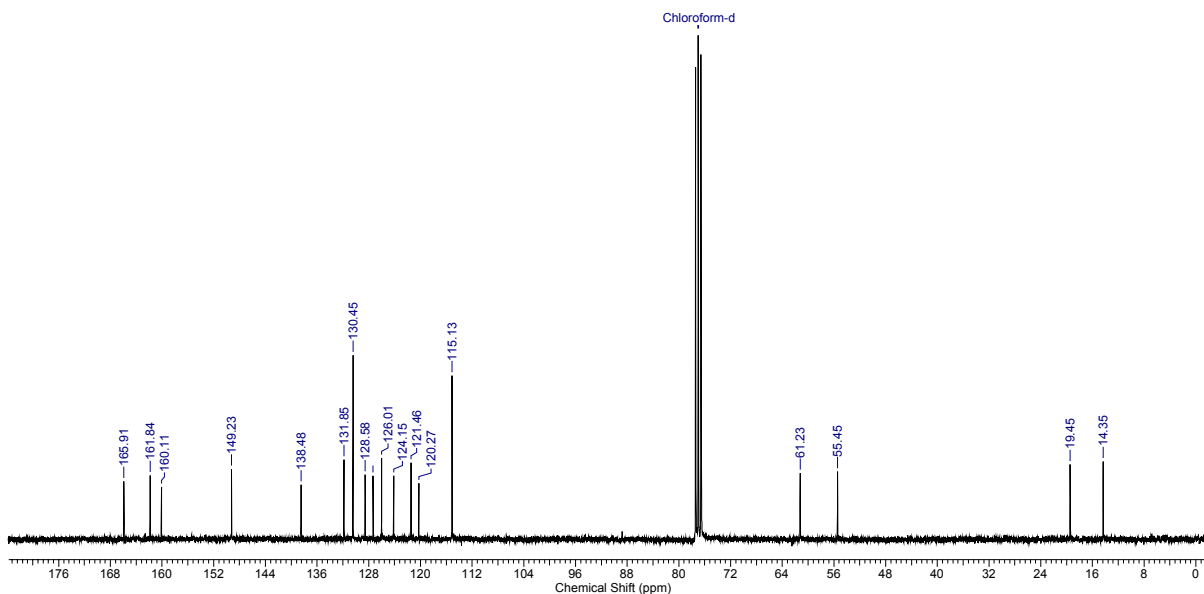

**8-(4-Methoxyphenyl)-4-methyl-6-(trifluoromethyl)quinolin-2(1H)-one (5b)**

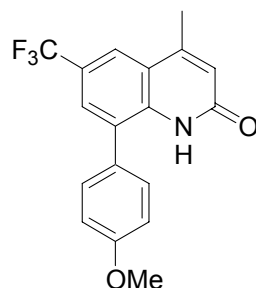

Prepared according to **TP 1** from 4-methoxyphenylmagnesium bromide (1.88 mL, 1.5 mmol, 0.8 M in THF), DME (3.5 mL), CuCN·2LiCl (1.4 mL, 1.4 mmol, 1.0 M in THF), Fe(acac)<sub>3</sub> (18 mg, 5 mol %) and 8-iodo-4-methyl-6-(trifluoromethyl)quinolin-2(1H)-one (177 mg, 0.50 mmol). Reaction time: 12 h. Purification by flash chromatography (pentane/EtOAc = 4:1) yielded biphenyl **5b** as a colorless solid (140 mg, 84 %).

**Mp.:** 142-143 °C.

**<sup>1</sup>H-NMR** (300 MHz, CDCl<sub>3</sub>): δ = 8.71 (s<sub>br</sub>, 1H), 7.90 (d, *J* = 0.9 Hz, 1H), 7.61 (d, *J* = 1.8 Hz, 1H), 7.32 (d, *J* = 8.9 Hz, 2H), 7.06 (d, *J* = 9.1 Hz, 2H), 6.58 (d, *J* = 1.3 Hz, 1H), 3.88 (s, 3H), 2.57 (d, *J* = 1.1 Hz, 3H).

**<sup>13</sup>C-NMR** (75 MHz, CDCl<sub>3</sub>): δ = 161.7, 160.3, 148.6, 137.6, 130.4, 129.4, 127.6 (q, *J* = 3.2), 126.8, 125.8, 124.3 (q, *J* = 33.0 Hz), 122.2, 121.2 (q, *J* = 4.1 Hz), 120.4, 115.3, 55.5, 19.3.

**MS** (70 eV, EI), *m/z* (%): 333 (95) [M<sup>+</sup>], 332 (100), 318 (14), 317 (8), 290 (7).

**IR** (KBr):  $\tilde{\nu}$  = 3387 (w), 3169 (w), 3047 (w), 2954 (w), 2837 (w), 1667 (s), 1607 (s), 1515 (m), 1464 (w), 1402 (s), 1318 (s), 1271 (s), 1214 (w), 1152 (m), 1114 (s), 1066 (m), 892 (m), 832 (w), 784 (w), 662 (w), 592 (w), 491 (w).

**HRMS** for C<sub>18</sub>H<sub>14</sub>F<sub>3</sub>NO<sub>2</sub> (333.0977): found: 333.0961.

**8-(4-Methoxyphenyl)-4-methyl-6-(trifluoromethyl)quinolin-2(1H)-one (5b)**

| Acquisition Time (sec) | 2.2610                                                          | Comment               | Ak Knochel User Kofink Bruker ARX 300 | Date                   | 10 Oct 2005 06:21:52 |
|------------------------|-----------------------------------------------------------------|-----------------------|---------------------------------------|------------------------|----------------------|
| File Name              | I:\Supporting Information - Paper\ccko_sp31\ccko_sp31_001000fid | Frequency (MHz)       | 300.13                                | Nucleus                | <sup>1</sup> H       |
| Number of Transients   | 64                                                              | Original Points Count | 8192                                  | Points Count           | 8192                 |
| Solvent                | CHLOROFORM-D                                                    | Sweep Width (Hz)      | 3623.19                               | Pulse Sequence         | zg30                 |
|                        |                                                                 |                       |                                       | Temperature (degree C) | 17.000               |

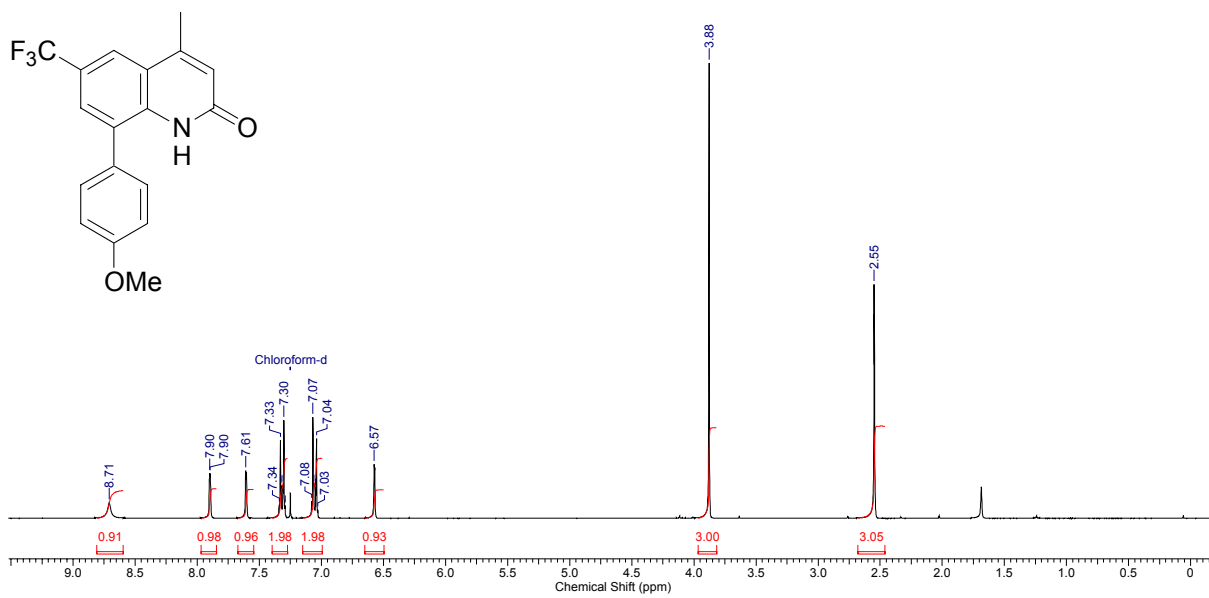

| Acquisition Time (sec) | 1.7039                                                          | Comment               | Ak Knochel User Kofink Bruker ARX 300 | Date                   | 10 Oct 2005 09:21:04 |
|------------------------|-----------------------------------------------------------------|-----------------------|---------------------------------------|------------------------|----------------------|
| File Name              | I:\Supporting Information - Paper\ccko_sp31\ccko_sp31_002000fid | Frequency (MHz)       | 75.48                                 | Nucleus                | <sup>13</sup> C      |
| Number of Transients   | 4096                                                            | Original Points Count | 32768                                 | Points Count           | 32768                |
| Solvent                | CHLOROFORM-D                                                    | Sweep Width (Hz)      | 19230.77                              | Pulse Sequence         | zgpg30               |
|                        |                                                                 |                       |                                       | Temperature (degree C) | 27.000               |

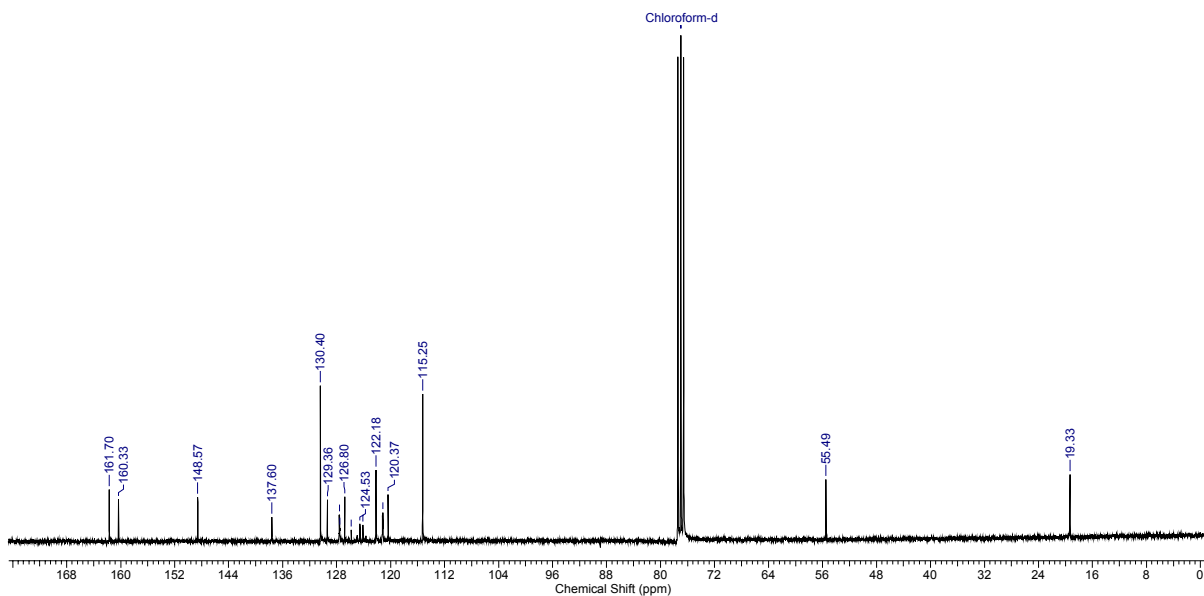



**4-[4-Methyl-2-oxo-6-(trifluoromethyl)-1,2-dihydroquinolin-8-yl]benzonitrile (5c)**

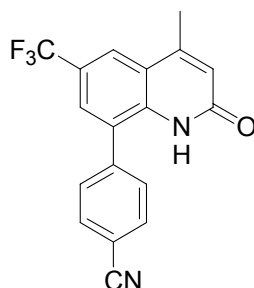

Prepared according to **TP 2** from 4-iodobenzonitrile (343 mg, 1.50 mmol), DME (3.5 mL), *i*PrMgCl (1.7 mL, 1.55 mmol, 0.9 M in THF), CuCN·2LiCl (1.4 mL, 1.4 mmol, 1.0 M in THF), Fe(acac)<sub>3</sub> (18 mg, 5 mol %) and 8-iodo-4-methyl-6-(trifluoromethyl)quinolin-2(1*H*)-one (177 mg, 0.50 mmol). Reaction time: 4 h. Purification by flash chromatography (pentane/EtOAc/MeOH = 4:1:0.1) yielded biphenyl **5c** as a colorless solid (122 mg, 74 %).

**Mp.:** 230.1-231.8 °C

**<sup>1</sup>H-NMR** (600 MHz, CDCl<sub>3</sub>): δ = 9.02 (s<sub>br</sub>, 1H), 7.98 (s, 1H), 7.84 (d, *J* = 8.1 Hz, 2H), 7.60 (s, 1H), 7.55 (d, *J* = 8.1 Hz, 2H), 6.55 (s, 1H), 2.57 (s, 3H).

**<sup>13</sup>C-NMR** (150 MHz, CDCl<sub>3</sub>): δ = 161.7, 148.6, 139.9, 137.3, 133.4, 130.2, 127.6, 127.5 (q, *J* = 4 Hz), 124.6 (q, *J* = 28 Hz), 123.8 (q, *J* = 277 Hz), 122.6 (q, *J* = 4 Hz), 122.5, 120.8, 118.0, 113.3, 19.4.

**MS** (70 eV, EI), *m/z* (%): 327 (100) [M-H<sup>+</sup>], 299 (4), 279 (2), 115 (2).

**IR** (KBr):  $\tilde{\nu}$  = 3189 (w), 2231 (w), 1667 (s), 1605 (m), 1395 (w), 1316 (s), 1261 (m), 1180 (m), 1098 (vs), 1059 (m), 896 (s), 833 (s), 780 (m), 632 (m).

**HRMS** for C<sub>18</sub>H<sub>11</sub>F<sub>3</sub>N<sub>2</sub>O (328.0823): found: 328.0797.

## 4-[4-Methyl-2-oxo-6-(trifluoromethyl)-1,2-dihydroquinolin-8-yl]benzonitrile (5c)

|                        |                                                                 |                       |                                         |                        |                      |
|------------------------|-----------------------------------------------------------------|-----------------------|-----------------------------------------|------------------------|----------------------|
| Acquisition Time (sec) | 2.0972                                                          | Comment               | Ak Knochel User C. Kofink Bruker AMX600 | Date                   | 13 Dec 2005 09:36:00 |
| File Name              | I:\Supporting Information - Paper\ccko_ng11\ccko_ng11_001000fid | Frequency (MHz)       | 599.70                                  | Nucleus                | <sup>1</sup> H       |
| Number of Transients   | 64                                                              | Original Points Count | 16384                                   | Points Count           | 16384                |
| Solvent                | CHLOROFORM-D                                                    | Sweep Width (Hz)      | 7812.50                                 | Pulse Sequence         | zg30                 |
|                        |                                                                 |                       |                                         | Temperature (degree C) | 27.000               |

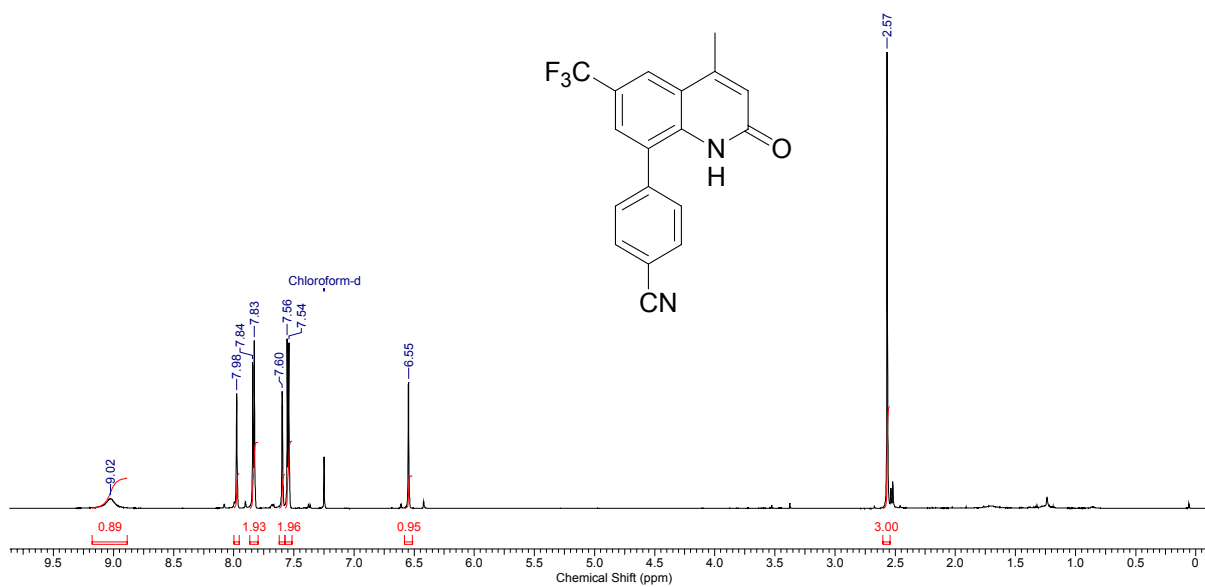

|                        |                                                                 |                       |                                         |                        |                      |
|------------------------|-----------------------------------------------------------------|-----------------------|-----------------------------------------|------------------------|----------------------|
| Acquisition Time (sec) | 0.8520                                                          | Comment               | Ak Knochel User C. Kofink Bruker AMX600 | Date                   | 13 Dec 2005 07:25:52 |
| File Name              | I:\Supporting Information - Paper\ccko_ng11\ccko_ng11_002000fid | Frequency (MHz)       | 150.81                                  | Nucleus                | <sup>13</sup> C      |
| Number of Transients   | 2277                                                            | Original Points Count | 32768                                   | Points Count           | 32768                |
| Solvent                | CHLOROFORM-D                                                    | Sweep Width (Hz)      | 38461.54                                | Temperature (degree C) | 27.000               |

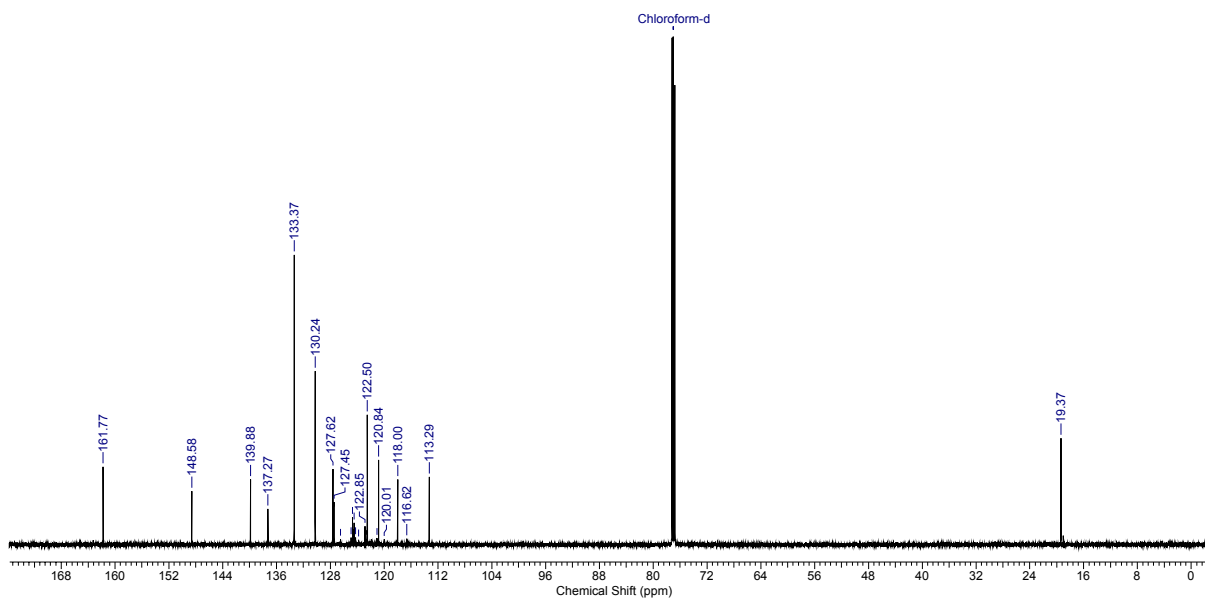

**Ethyl 8-[4-(ethoxycarbonyl)phenyl]-4-methyl-2-oxo-1,2-dihydroquinoline-6-carboxylate (5d)**

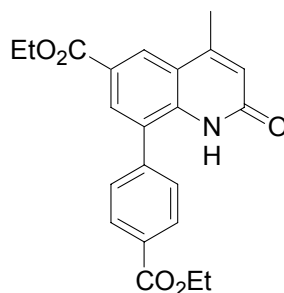

Prepared according to **TP 2** from ethyl 4-iodobenzoate (428 mg, 1.50 mmol), DME (3.5 mL), *i*PrMgCl (1.7 mL, 1.55 mmol, 0.9 M in THF), CuCN·2LiCl (1.4 mL, 1.4 mmol, 1.0 M in THF), Fe(acac)<sub>3</sub> (18 mg, 5 mol %) and ethyl 8-iodo-4-methyl-2-oxo-1,2-dihydroquinoline-6-carboxylate (178 mg, 0.50 mmol). Reaction time: 3 h. Purification by flash chromatography (pentane/EtOAc/MeOH = 4:1:0.1) yielded biphenyl **5d** as a colorless solid (158 mg, 88 %).

**Mp.:** 212.0-213.8 °C

**<sup>1</sup>H-NMR** (300 MHz, CDCl<sub>3</sub>): δ = 8.63 (s<sub>br</sub>, 1H), 8.41 (d, *J* = 1.8 Hz, 1H), 8.20 (dt, *J* = 8.4, 1.8 Hz, 2H), 8.06 (d, *J* = 1.8 Hz, 1H), 7.50 (dt, *J* = 8.3, 1.8 Hz, 2H), 6.55 (d, *J* = 0.9 Hz, 1H), 4.47-4.37 (m, 4H), 2.57 (d, *J* = 1.3 Hz, 3H), 1.45-1.37 (m, 6H).

**<sup>13</sup>C-NMR** (75 MHz, CDCl<sub>3</sub>): δ = 165.8, 165.7, 161.7, 149.2, 139.9, 138.0, 131.7, 131.1, 130.8, 129.4, 127.7, 126.8, 124.3, 121.7, 120.5, 61.4, 61.3, 19.5, 14.4, 14.3.

**MS** (70 eV, EI), *m/z* (%): 379 (100) [M<sup>+</sup>], 350 (16), 334 (31), 306 (12), 278 (7), 233 (8), 204 (11).

**IR** (KBr):  $\tilde{\nu}$  = 3296 (w), 2980 (w), 1710 (s), 1672 (vs), 1596 (s), 1365 (m), 1287 (m), 1253 (m), 1239 (vs), 1207 (s), 1177 (s), 1101 (s), 1029 (m), 957 (m), 855 (m), 767 (s), 716 (m).

**HRMS** for C<sub>22</sub>H<sub>21</sub>NO<sub>5</sub> (379.1420): found: 379.1411.

**Ethyl 8-[4-(ethoxycarbonyl)phenyl]-4-methyl-2-oxo-1,2-dihydroquinoline-6-carboxylate**  
**(5d)**

|                        |                                                             |                       |                                       |                        |                      |
|------------------------|-------------------------------------------------------------|-----------------------|---------------------------------------|------------------------|----------------------|
| Acquisition Time (sec) | 2.2610                                                      | Comment               | Ak Knochel User Kofink Bruker ARX 300 | Date                   | 14 Nov 2005 09:53:04 |
| File Name              | I:\Supporting Information - Paper\cko_ng5\cko_ng5_001000fid | Frequency (MHz)       | 300.13                                | Nucleus                | <sup>1</sup> H       |
| Number of Transients   | 64                                                          | Original Points Count | 8192                                  | Points Count           | 8192                 |
| Solvent                | CHLOROFORM-D                                                | Sweep Width (Hz)      | 3623.19                               | Pulse Sequence         | zgpg30               |
|                        |                                                             |                       |                                       | Temperature (degree C) | 17.000               |

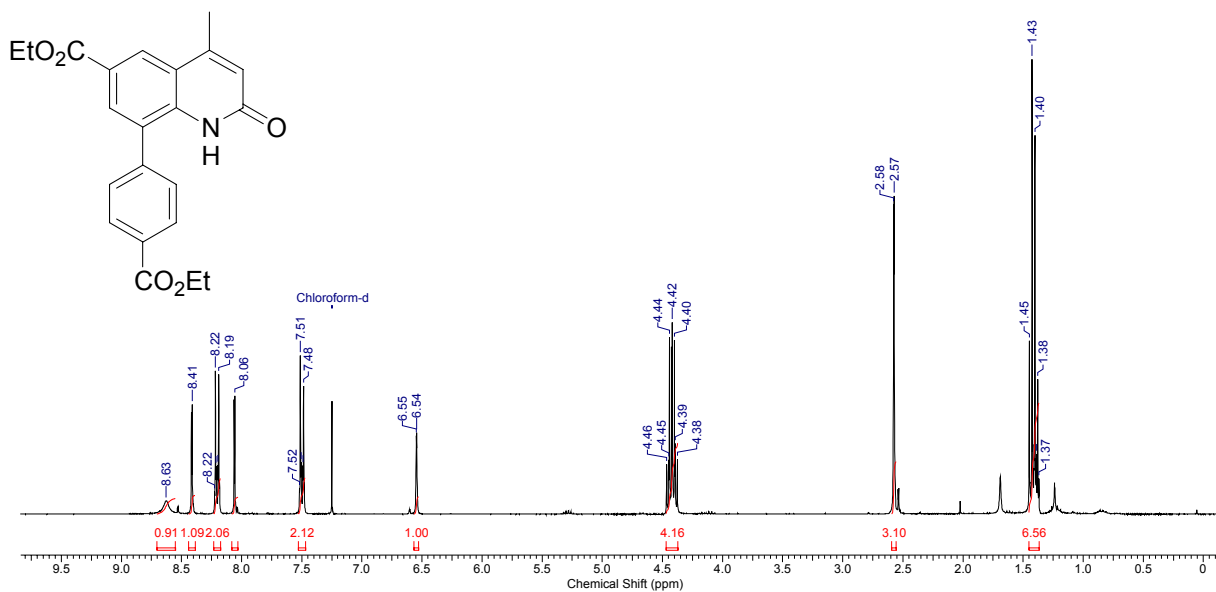

|                        |                                                             |                       |                                       |                        |                      |
|------------------------|-------------------------------------------------------------|-----------------------|---------------------------------------|------------------------|----------------------|
| Acquisition Time (sec) | 1.7039                                                      | Comment               | Ak Knochel User Kofink Bruker ARX 300 | Date                   | 14 Nov 2005 10:48:32 |
| File Name              | I:\Supporting Information - Paper\cko_ng5\cko_ng5_002000fid | Frequency (MHz)       | 75.48                                 | Nucleus                | <sup>13</sup> C      |
| Number of Transients   | 1537                                                        | Original Points Count | 32768                                 | Points Count           | 32768                |
| Solvent                | CHLOROFORM-D                                                | Sweep Width (Hz)      | 19230.77                              | Pulse Sequence         | zgpg30               |
|                        |                                                             |                       |                                       | Temperature (degree C) | 27.000               |

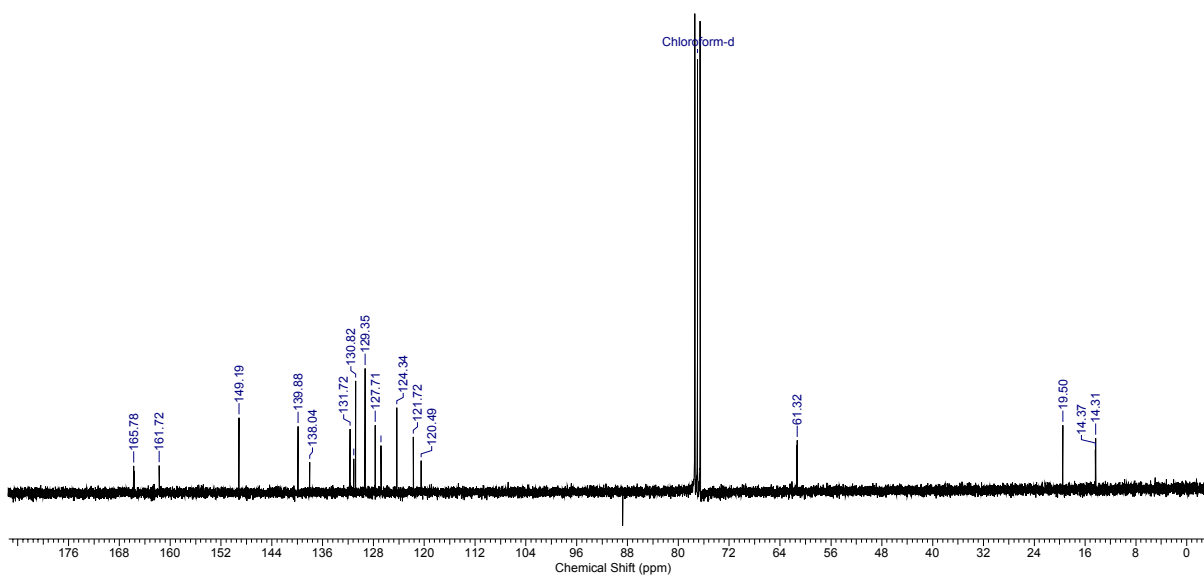

**Ethyl 4-[4-methyl-2-oxo-6-(trifluoromethyl)-1,2-dihydroquinolin-8-yl]benzoate (5e)**

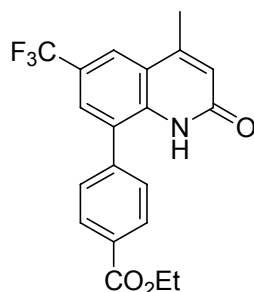

Prepared according to **TP 2** from ethyl 4-iodobenzoate (428 mg, 1.50 mmol), DME (3.5 mL), *i*PrMgCl (1.7 mL, 1.55 mmol, 0.9 M in THF), CuCN·2LiCl (1.4 mL, 1.4 mmol, 1.0 M in THF), Fe(acac)<sub>3</sub> (18 mg, 5 mol %) and 8-Iodo-4-methyl-6-(trifluoromethyl)quinolin-2(1*H*)-one (177 mg, 0.50 mmol). Reaction time: 12 h. Purification by flash chromatography (pentane/EtOAc = 4:1) yielded biphenyl **5e** as a colorless solid (158 mg, 88 %).

**Mp.:** 222-224 °C.

**<sup>1</sup>H-NMR** (300 MHz, CDCl<sub>3</sub>): δ = 8.76 (s<sub>br</sub>, 1H), 8.21 (d, *J* = 8.5 Hz, 2H), 7.95 (d, *J* = 1.0 Hz, 1H), 7.62 (d, *J* = 1.7 Hz, 1H), 7.49 (d, *J* = 8.5 Hz, 2H), 6.57 (d, *J* = 1.0 Hz, 1H), 4.43 (q, *J* = 7.2 Hz, 2H), 2.55 (d, *J* = 1.1 Hz, 3H), 1.42 (t, *J* = 7.1 Hz, 3H).

**<sup>13</sup>C-NMR** (75 MHz, CDCl<sub>3</sub>): δ = 165.7, 161.6, 148.5, 139.3, 137.3, 131.3, 130.9, 129.3, 128.5, 127.4 (q, *J* = 3.5 Hz), 125.7, 124.4 (q, *J* = 33.5), 122.4, 122.0 (q, *J* = 3.8 Hz), 120.6, 61.4, 19.3, 14.3.

**MS** (70 eV, EI), *m/z* (%): 375 (100) [M<sup>+</sup>], 374 (56), 347 (10), 346 (38), 330 (37), 303 (14), 302 (58) 272 (20), 204 (15), 164 (12).

**IR** (KBr):  $\tilde{\nu}$  = 2986 (w), 1716 (m), 1668 (s), 1608 (m) 1401 (w), 1317 (m), 1276 (m), 1190 (w), 1157 (w), 1108 (m), 1062 (w), 1022 (w), 894 (w), 774 (w), 708 (w), 494 (w).

**HRMS** for C<sub>20</sub>H<sub>16</sub>F<sub>3</sub>NO<sub>3</sub> (375.1082): found: 375.1059.

**Ethyl 4-[4-methyl-2-oxo-6-(trifluoromethyl)-1,2-dihydroquinolin-8-yl]benzoate (5e)**

|                        |                                                               |                       |                                       |                        |                      |
|------------------------|---------------------------------------------------------------|-----------------------|---------------------------------------|------------------------|----------------------|
| Acquisition Time (sec) | 2.2610                                                        | Comment               | Ak Knochel User Kofink Bruker ARX 300 | Date                   | 13 Oct 2005 04:35:12 |
| File Name              | I:\Supporting Information - Paper\cko-sp34\cko-sp34_001000fid | Frequency (MHz)       | 300.13                                | Nucleus                | <sup>1</sup> H       |
| Number of Transients   | 64                                                            | Original Points Count | 8192                                  | Points Count           | 8192                 |
| Solvent                | CHLOROFORM-D                                                  | Sweep Width (Hz)      | 3623.19                               | Pulse Sequence         | zg30                 |
|                        |                                                               |                       |                                       | Temperature (degree C) | 17.000               |

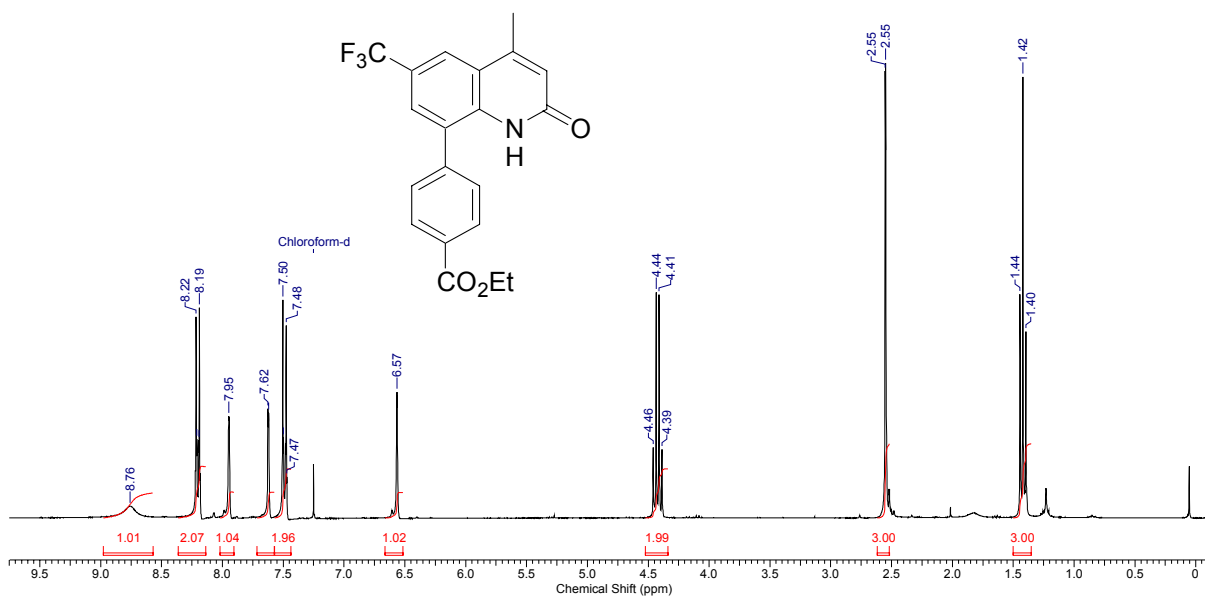

|                        |                                                               |                       |                                       |                        |                      |
|------------------------|---------------------------------------------------------------|-----------------------|---------------------------------------|------------------------|----------------------|
| Acquisition Time (sec) | 1.7039                                                        | Comment               | Ak Knochel User Kofink Bruker ARX 300 | Date                   | 13 Oct 2005 05:28:32 |
| File Name              | I:\Supporting Information - Paper\cko-sp34\cko-sp34_002000fid | Frequency (MHz)       | 75.48                                 | Nucleus                | <sup>13</sup> C      |
| Number of Transients   | 2048                                                          | Original Points Count | 32768                                 | Points Count           | 32768                |
| Solvent                | CHLOROFORM-D                                                  | Sweep Width (Hz)      | 19230.77                              | Pulse Sequence         | zgpg30               |
|                        |                                                               |                       |                                       | Temperature (degree C) | 27.000               |

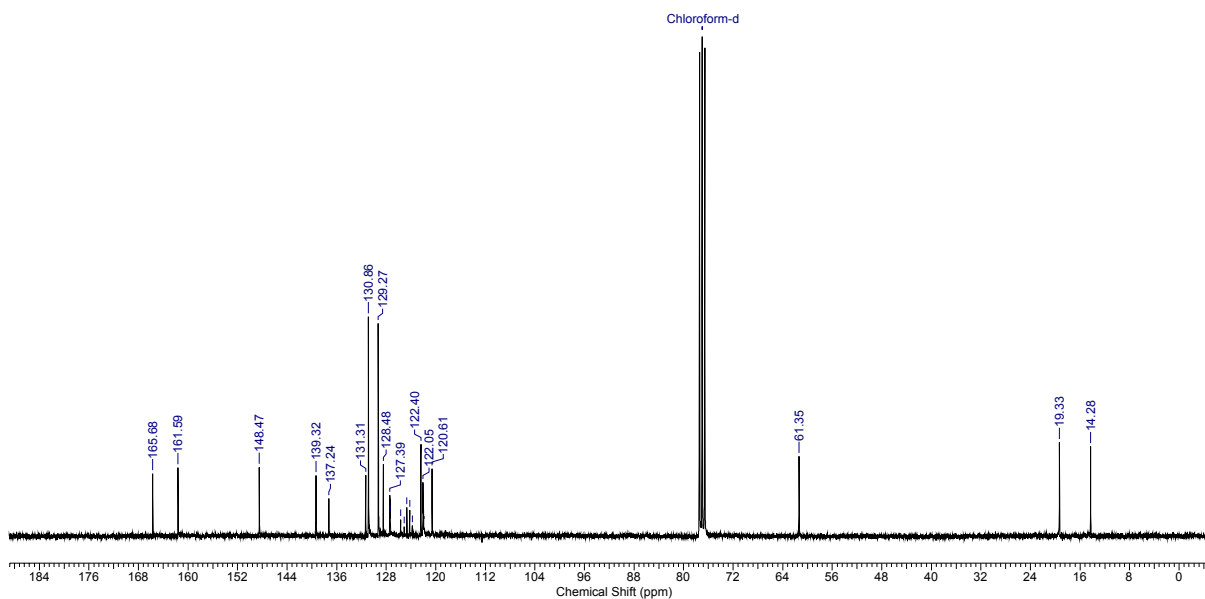

**Ethyl 3-iodo-4-[(4-methoxybenzoyl)amino]benzoate (6a)**

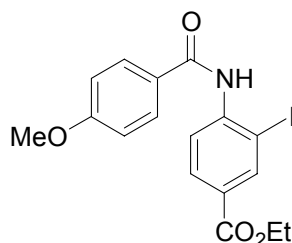

Prepared according to **TP 3** from ethyl 4-amino-3-iodobenzoate (1.30 g, 4.47 mmol) and *p*-anisoyl chloride (0.6 mL, 4.5 mmol) in dioxane (20 mL) and pyridine (10 mL). Reaction time: 12 h. Purification by recrystallization from ethanol furnished **6a** as a pink solid (1.35 g, 71 %).

**Mp.:** 138.4-140.0 °C.

**<sup>1</sup>H-NMR** (600 MHz, CDCl<sub>3</sub>): δ = 8.59 (d, *J* = 8.6 Hz, 1H), 8.47 (t, *J* = 2.1 Hz, 1H), 8.42 (s<sub>br</sub>, 1H), 8.04 (d, *J* = 8.7 Hz, 1H), 7.93 (d, *J* = 6.6 Hz, 2H), 7.01 (d, *J* = 6.7 Hz, 2H), 4.36 (q, *J* = 7.1 Hz, 2H), 3.88 (s, 3H), 1.39 (t, *J* = 7.1 Hz, 3H).

**<sup>13</sup>C-NMR** (150 MHz, CDCl<sub>3</sub>): δ = 164.8, 164.7, 163.0, 142.2, 140.1, 130.9, 129.2, 127.2, 126.3, 119.8, 114.3, 88.6, 61.2, 55.5, 14.3.

**MS** (70 eV, EI), *m/z* (%): 425 (4) [M<sup>+</sup>], 298 (40), 135 (100), 92 (4), 77 (5).

**IR** (KBr):  $\tilde{\nu}$  = 3403 (w), 2984 (w), 1708 (m), 1692 (m), 1589 (m), 1503 (vs), 1237 (s), 1263 (vs), 1173 (vs), 1113 (m), 1091 (s), 1023 (s), 842 (m), 763 (s), 751 (s), 684 (s), 633 (m).

**HRMS** for C<sub>17</sub>H<sub>16</sub>INO<sub>4</sub> (425.0124): found: 425.0137.

**Ethyl 3-iodo-4-[(4-methoxybenzoyl)amino]benzoate (6a)**

|                        |                                                        |                      |                          |                       |            |
|------------------------|--------------------------------------------------------|----------------------|--------------------------|-----------------------|------------|
| Acquisition Time (sec) | 4.0000                                                 | Comment              | Benoit Blank, AK Knochel | Date                  | Jun 2 2006 |
| File Name              | \srvknoch2\bblch\Spektren\NMR\600 MHz\BB1102_Proton_01 |                      |                          | Frequency (MHz)       | 599.68     |
| Nucleus                | 1H                                                     | Number of Transients | 8                        | Original Points Count | 28902      |
| Pulse Sequence         | s2pul                                                  | Solvent              | CHLOROFORM-D             | Points Count          | 32768      |
| Temperature (degree C) | 27.000                                                 |                      |                          | Sweep Width (Hz)      | 7225.43    |

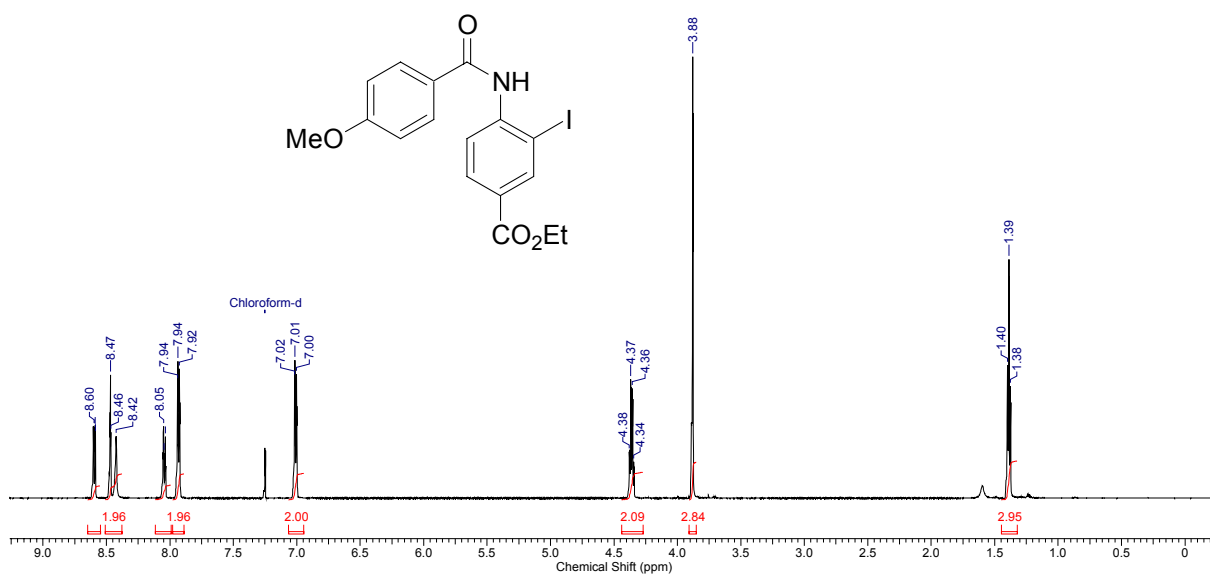



|                        |                                                           |                      |                          |                       |            |
|------------------------|-----------------------------------------------------------|----------------------|--------------------------|-----------------------|------------|
| Acquisition Time (sec) | 1.6000                                                    | Comment              | Benoit Blank, AK Knochel | Date                  | Jun 2 2006 |
| File Name              | \\sfnknoch2\bblch\Spektr\NMR\600 MHz\BB1102_Carbon2048_01 | Frequency (MHz)      | 150.81                   | Points Count          | 65536      |
| Nucleus                | <sup>13</sup> C                                           | Number of Transients | 4098                     | Original Points Count | 58824      |
| Pulse Sequence         | s2pul                                                     | Solvent              | CHLOROFORM-D             | Sweep Width (Hz)      | 36764.71   |
| Temperature (degree C) | 27.000                                                    |                      |                          |                       |            |

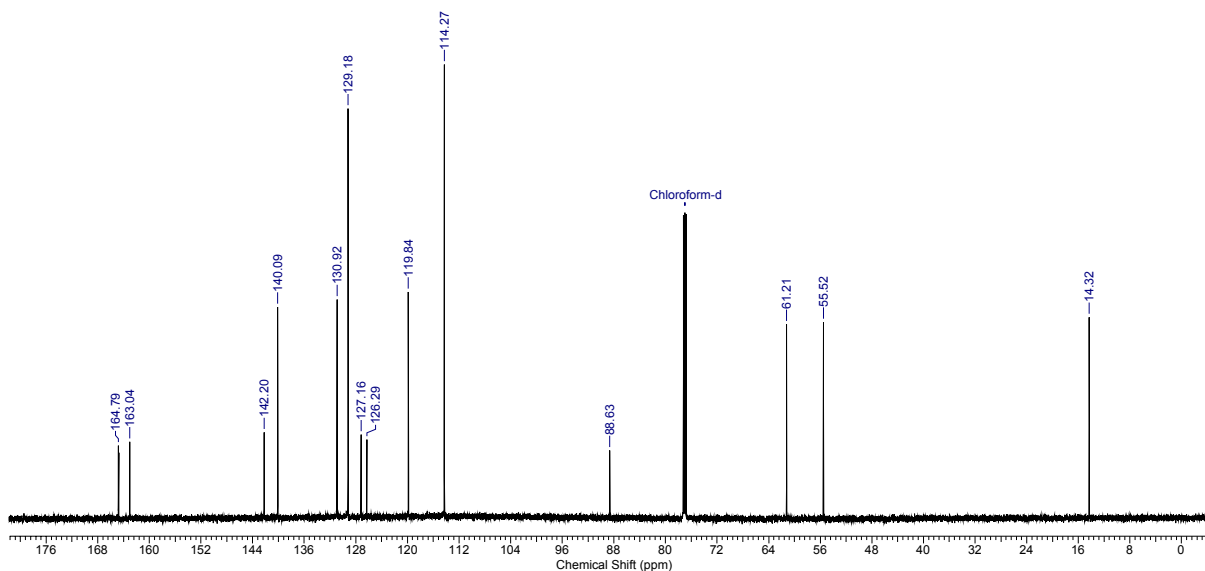

### *N*-(4-Cyano-2-iodophenyl)-4-methoxybenzamide (**6b**)

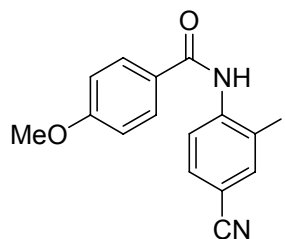

Prepared according to **TP 3** from 4-amino-3-iodo-benzonitrile (1.28 g, 5.26 mmol) and *p*-anisoyl chloride (0.7 mL, 5.3 mmol) in dioxane (20 mL) and pyridine (10 mL). Reaction time: 12 h. Purification by recrystallization from ethanol furnished **6b** as a colorless solid (1.27 g, 64 %).

**Mp.:** 206.6-208.7 °C.

<sup>1</sup>H-NMR (600 MHz, CDCl<sub>3</sub>): δ = 8.67 (d, *J* = 8.6 Hz, 1H), 8.43 (s<sub>br</sub>, 1H), 8.08-8.06 (m, 1H), 7.93-7.90 (m, 2H), 7.66 (dd, *J* = 8.7, 1.9 Hz, 1H), 7.03-7.00 (m, 2H), 3.89 (s, 3H).

# Supplementary Material (ESI) for Chemical Communications

# This journal is (c) The Royal Society of Chemistry 2007

**<sup>13</sup>C-NMR** (150 MHz, CDCl<sub>3</sub>): δ = 165.1, 163.5, 142.8, 142.2, 133.6, 129.5, 126.1, 120.6, 117.4, 114.6, 108.7, 88.7, 55.8.

**MS** (70 eV, EI), *m/z* (%): 377 (4) [M<sup>+</sup>], 251 (4), 135 (100), 92 (4), 77 (5).

**IR** (KBr):  $\tilde{\nu}$  = 3380 (w), 2228 (w), 1787 (w), 1668 (m), 1607 (m), 1568 (m), 1502 (s), 1443 (m), 1383 (m), 1298 (m), 1258 (s), 1235 (s), 1181 (s), 1118 (m), 1023 (s), 886 (m), 843 (vs).

**HRMS** for C<sub>15</sub>H<sub>11</sub>IN<sub>2</sub>O<sub>2</sub> (377.9865): found: 377.9842.

***N*-(4-Cyano-2-iodophenyl)-4-methoxybenzamide (6b)**

# Supplementary Material (ESI) for Chemical Communications

# This journal is (c) The Royal Society of Chemistry 2007

|                        |                                                        |                      |                          |                       |            |
|------------------------|--------------------------------------------------------|----------------------|--------------------------|-----------------------|------------|
| Acquisition Time (sec) | 4.0000                                                 | Comment              | Benoit Blank, AK Knochel | Date                  | Jun 2 2006 |
| File Name              | \\srvknoch2\bblch\Spektren\NMR\600 MHz\bb101_Proton_01 |                      |                          | Frequency (MHz)       | 599.68     |
| Nucleus                | <sup>1</sup> H                                         | Number of Transients | 8                        | Original Points Count | 28902      |
| Pulse Sequence         | s2pul                                                  | Solvent              | CHLOROFORM-D             | Points Count          | 32768      |
| Temperature (degree C) | 27.000                                                 |                      |                          | Sweep Width (Hz)      | 7225.43    |

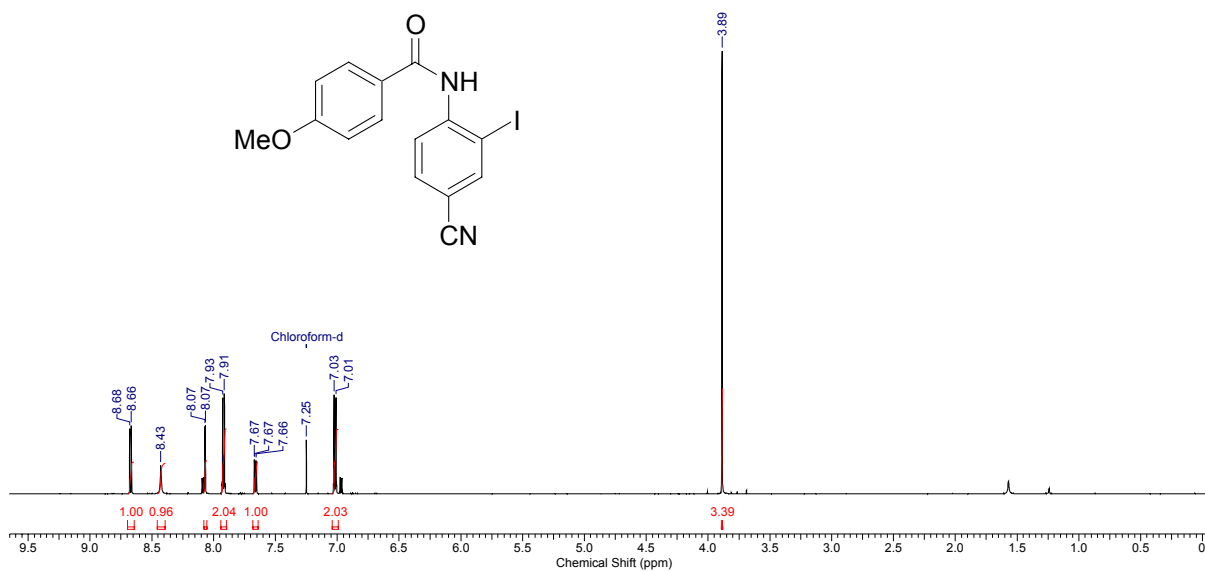

|                        |                                                            |                      |                          |                       |            |
|------------------------|------------------------------------------------------------|----------------------|--------------------------|-----------------------|------------|
| Acquisition Time (sec) | 1.6000                                                     | Comment              | Benoit Blank, AK Knochel | Date                  | Jun 1 2006 |
| File Name              | \\srvknoch2\bblch\Spektren\NMR\600 MHz\BB101_Carbon2048_01 |                      |                          | Frequency (MHz)       | 150.81     |
| Nucleus                | <sup>13</sup> C                                            | Number of Transients | 4096                     | Original Points Count | 58824      |
| Pulse Sequence         | s2pul                                                      | Solvent              | CHLOROFORM-D             | Points Count          | 65536      |
| Temperature (degree C) | 27.000                                                     |                      |                          | Sweep Width (Hz)      | 36764.71   |

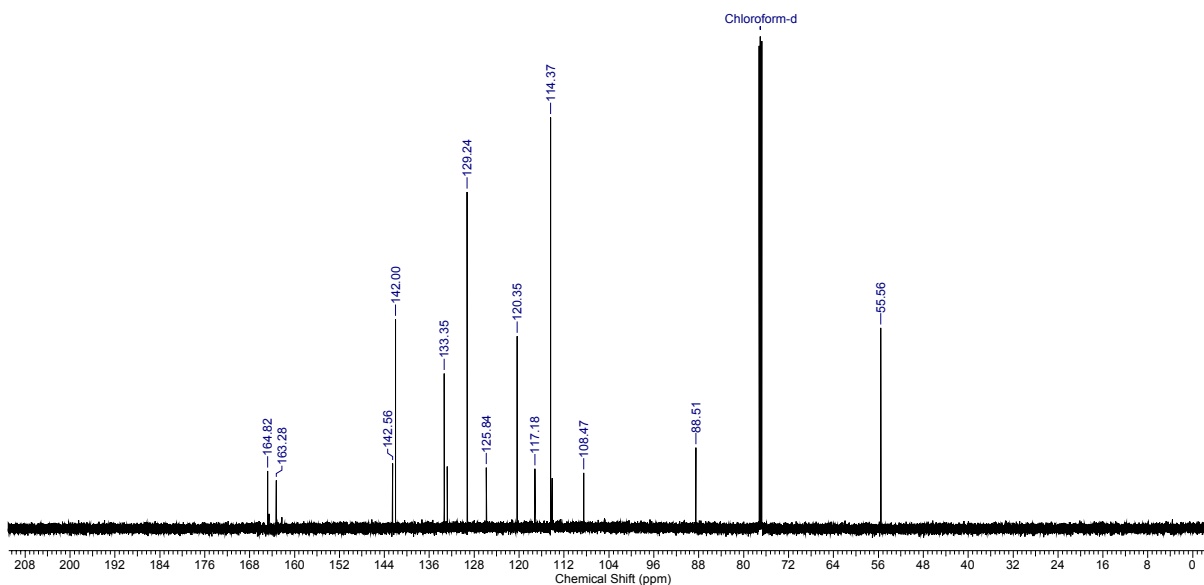

***N*-{2-Iodo-4-[(triisopropylsilyl)oxy]phenyl}-4-methoxybenzamide (**6c**)**

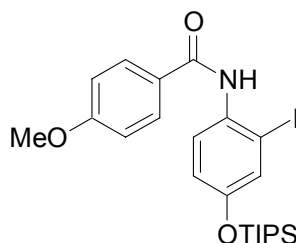

Prepared according to **TP 3** from 2-iodo-4-[(triisopropylsilyl)oxy]aniline (3.38 g, 8.63 mmol) and *p*-anisoyl chloride (1.2 mL, 8.8 mmol) in dioxane (30 mL) and pyridine (10 mL). Reaction time: 2 h. Purification by recrystallization from ethanol furnished **6c** as a colorless solid (3.43 g, 76 %).

**Mp.:** 106.8-108.0 °C.

**<sup>1</sup>H-NMR** (300 MHz, CDCl<sub>3</sub>): δ = 8.18 (d, *J* = 9.3 Hz, 1H), 7.99 (s<sub>br</sub>, 1H), 7.93-7.88 (m, 2H), 7.34 (d, *J* = 2.7 Hz, 1H), 7.01-6.96 (m, 2H), 6.91 (dd, *J* = 8.8, 2.7 Hz, 1H), 3.87 (s, 3H), 1.30-1.18 (m, 3H), 1.09 (d, *J* = 7.1 Hz, 18H).

**<sup>13</sup>C-NMR** (75 MHz, CDCl<sub>3</sub>): δ = 164.7, 162.6, 153.0, 132.2, 129.6, 129.0, 126.9, 122.4, 120.3, 114.1, 90.5, 55.5, 17.9, 12.6.

**MS** (70 eV, EI), *m/z* (%): 525 (97) [M<sup>+</sup>], 482 (42), 454 (27), 426 (18), 398 (97), 355 (41), 298 (20), 135 (100).

**IR** (KBr):  $\tilde{\nu}$  = 3393 (w), 2942 (w), 2863 (w), 1652 (m), 1606 (m), 1564 (m), 1501 (m), 1463 (m), 1382 (m), 1247 (m), 1180 (m), 1021 (m), 922 (s), 881 (s), 855 (vs), 824 (vs), 790 (m), 726 (s), 689 (vs).

**HRMS** for C<sub>23</sub>H<sub>32</sub>INO<sub>3</sub>Si (525.1196): found: 525.1172.

***N*-{2-Iodo-4-[(triisopropylsilyl)oxy]phenyl}-4-methoxybenzamide (6c)**

|                        |                                                        |                       |                          |                        |        |                |       |
|------------------------|--------------------------------------------------------|-----------------------|--------------------------|------------------------|--------|----------------|-------|
| Acquisition Time (sec) | 2.0486                                                 | Comment               | Benoit Blank, AK Knochel |                        | Date   | Jun 22 2006    |       |
| File Name              | \usrvknocch2\bblch\Spektr\NMR\300 MHz\bbl119_Proton_01 |                       |                          | Frequency (MHz)        | 300.10 | Nucleus        | 1H    |
| Number of Transients   | 8                                                      | Original Points Count | 7401                     | Points Count           | 8192   | Pulse Sequence | s2pul |
| Solvent                | CHLOROFORM-D                                           | Sweep Width (Hz)      | 3612.72                  | Temperature (degree C) | 27.000 |                |       |

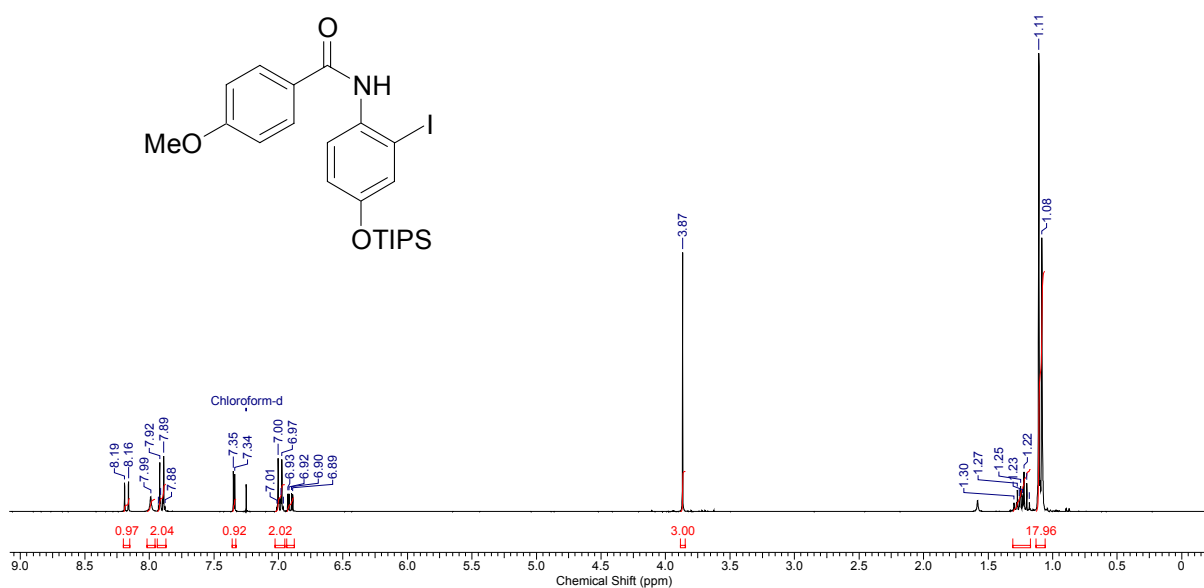

|                        |                                                            |                      |                          |                       |             |
|------------------------|------------------------------------------------------------|----------------------|--------------------------|-----------------------|-------------|
| Acquisition Time (sec) | 1.6010                                                     | Comment              | Benoit Blank, AK Knochel | Date                  | Jun 22 2006 |
| File Name              | \\sfnknoch2\bblich\Spektren\NMR\300 MHz\bb1119_Carbon2k_01 | Number of Transients | 2048                     | Original Points Count | 29004       |
| Nucleus                | <sup>13</sup> C                                            | Solvent              | CHLOROFORM-D             | Frequency (MHz)       | 75.47       |
| Pulse Sequence         | s2pul                                                      |                      |                          | Points Count          | 32768       |
| Temperature (degree C) | 27.000                                                     |                      |                          | Sweep Width (Hz)      | 18115.94    |

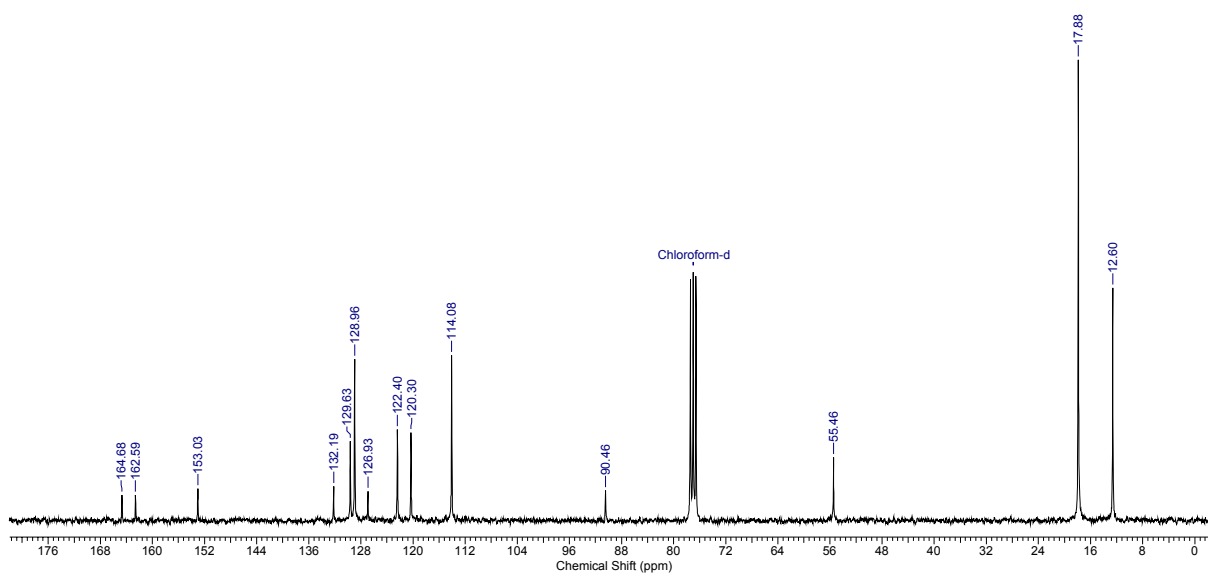

### ***N*-(2-Iodo-4-methoxyphenyl)-4-methoxybenzamide (6d)**

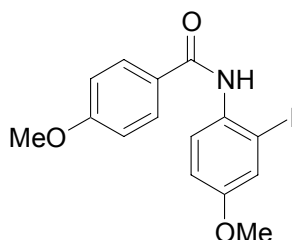

Prepared according to **TP 3** from 2-iodo-4-methoxyaniline (2.02 g, 8.10 mmol) and *p*-anisoyl chloride (1.1 mL, 8.2 mmol) in dioxane (25 mL) and pyridine (10 mL). Reaction time: 2 h. Purification by recrystallization from ethanol furnished **6d** as a colorless solid (2.75 g, 89 %).

**Mp.:** 185.8-187.0 °C.

**<sup>1</sup>H-NMR** (300 MHz, CDCl<sub>3</sub>): δ = 8.20 (d, *J* = 8.8 Hz, 1H), 7.97 (s<sub>br</sub>, 1H), 7.94-7.88 (m, 2H), 7.34 (d, *J* = 2.7 Hz, 1H), 7.01-6.93 (m, 3H), 3.87 (s, 3H), 3.78 (s, 3H).

**<sup>13</sup>C-NMR** (75 MHz, CDCl<sub>3</sub>): δ = 164.7, 162.6, 156.6, 132.0, 129.0, 126.8, 123.8, 123.0,

114.8, 114.1, 91.2, 55.7, 55.5.

**MS** (70 eV, EI), *m/z* (%): 383 (29) [ $M^+$ ], 256 (77), 240 (5), 135 (100), 107 (7), 92 (7), 77 (10).

**IR** (KBr):  $\tilde{\nu}$  = 3278 (w), 2835 (w), 1644 (m), 1603 (m), 1491 (s), 1458 (m), 1312 (m), 1284 (m), 1253 (s), 1216 (s), 1173 (s), 1021 (vs), 869 (m), 7841 (s), 763 (m), 640 (m), 606 (s).

**HRMS** for  $C_{15}H_{14}INO_3$  (383.0018): found: 382.9995.

***N*-(2-Iodo-4-methoxyphenyl)-4-methoxybenzamide (6d)**

|                        |                                                               |                      |                          |                       |             |
|------------------------|---------------------------------------------------------------|----------------------|--------------------------|-----------------------|-------------|
| Acquisition Time (sec) | 2.0486                                                        | Comment              | Benoit Blank, AK Knochel | Date                  | Jul 12 2006 |
| File Name              | \\141.84.254.80\NMR_Roh\300MHz\Knochel\Blank\bl_117_Proton_01 |                      |                          | Frequency (MHz)       | 300.10      |
| Nucleus                | <sup>1</sup> H                                                | Number of Transients | 8                        | Original Points Count | 7401        |
| Pulse Sequence         | s2pul                                                         | Solvent              | CHLOROFORM-D             | Points Count          | 8192        |
| Temperature (degree C) | 27.000                                                        |                      |                          | Sweep Width (Hz)      | 3612.72     |

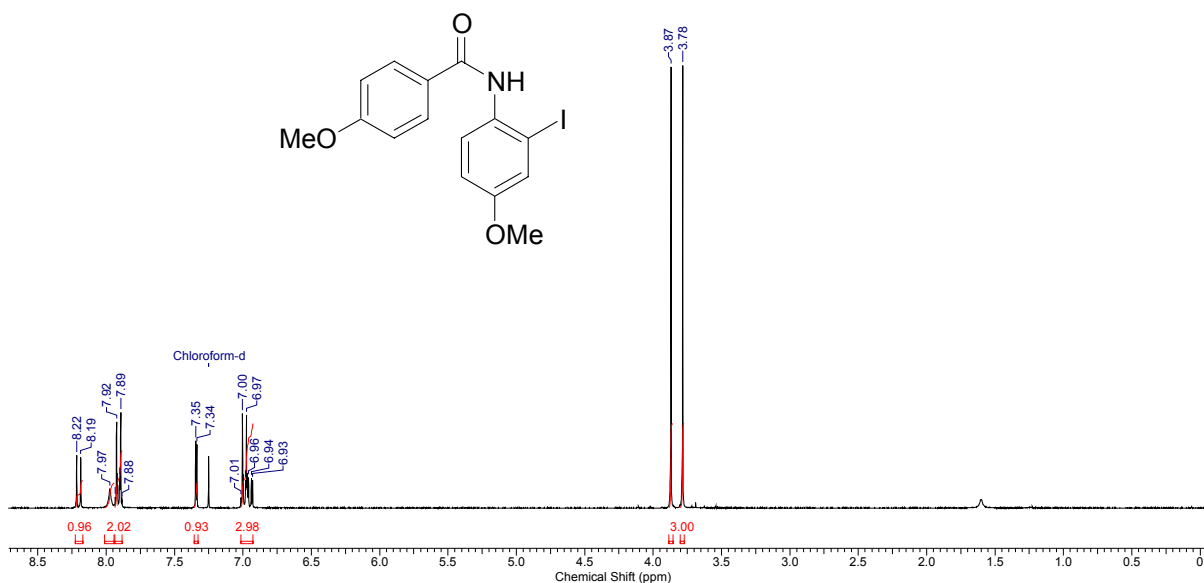

|                        |                                                                 |                      |                          |                       |             |
|------------------------|-----------------------------------------------------------------|----------------------|--------------------------|-----------------------|-------------|
| Acquisition Time (sec) | 1.6010                                                          | Comment              | Benoit Blank, AK Knochel | Date                  | Jul 12 2006 |
| File Name              | \\141.84.254.80\NMR_Roh\300MHz\Knochel\Blank\bl_117_Carbon2k_01 |                      |                          | Frequency (MHz)       | 75.47       |
| Nucleus                | <sup>13</sup> C                                                 | Number of Transients | 8192                     | Original Points Count | 29004       |
| Pulse Sequence         | s2pul                                                           | Solvent              | CHLOROFORM-D             | Points Count          | 32768       |
| Temperature (degree C) | 27.000                                                          |                      |                          | Sweep Width (Hz)      | 18115.94    |

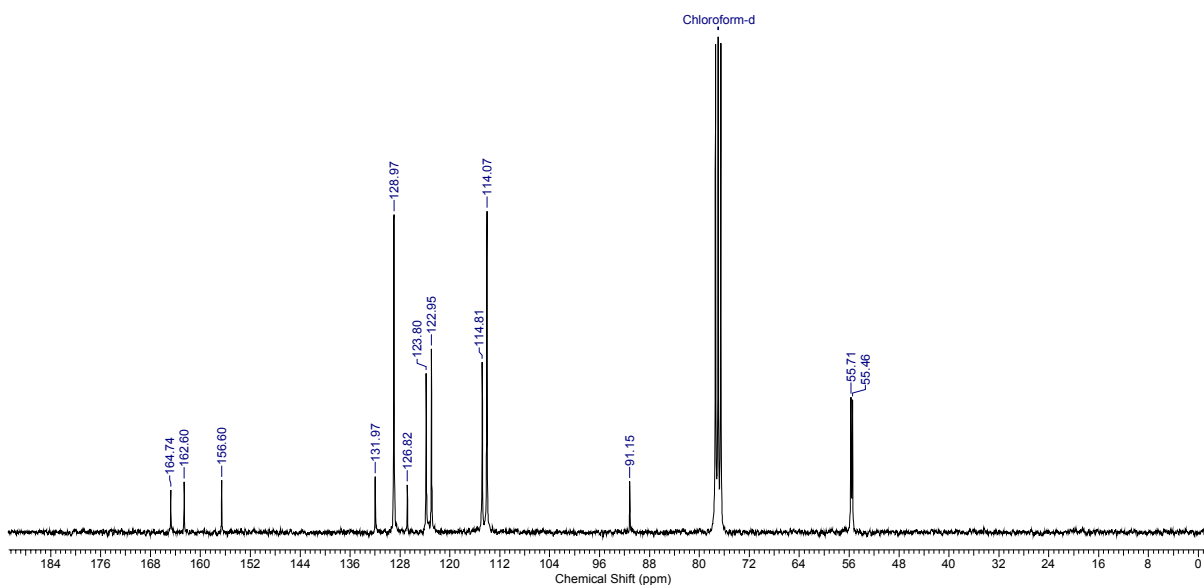



***N*-[2-Iodo-4-(trifluoromethyl)phenyl]-4-methoxybenzamide (**6e**)**

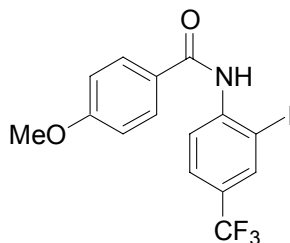

Prepared according to **TP 3** from 2-iodo-4-(trifluoromethyl)aniline (2.12 g, 7.37 mmol) and *p*-anisoyl chloride (1.0 mL, 7.4 mmol) in dioxane (20 mL) and pyridine (10 mL). Reaction time: 18 h. Purification by recrystallization from ethanol furnished **6e** as a colorless solid (1.96 g, 63 %).

**Mp.:** 158.9-160.1 °C.

**<sup>1</sup>H-NMR** (600 MHz, CDCl<sub>3</sub>): δ = 8.63 (d, *J* = 8.6 Hz, 1H), 8.37 (s<sub>br</sub>, 1H), 8.04 (d, *J* = 1.3 Hz, 1H), 7.95-7.92 (m, 2H), 7.64 (dd, *J* = 8.7, 1.9 Hz, 1H), 7.02 (d, *J* = 8.8 Hz, 2H), 3.89 (s, 3H).

**<sup>13</sup>C-NMR** (150 MHz, CDCl<sub>3</sub>): δ = 164.9, 163.1, 141.6, 135.7 (q, *J* = 3.5 Hz), 129.2, 127.1 (q, *J* = 33.6 Hz), 126.6 (q, *J* = 3.5 Hz), 126.1, 122.9 (q, *J* = 272.1 Hz), 120.6, 114.3, 88.7, 55.5.

**MS** (70 eV, EI), *m/z* (%): 421 (3) [M<sup>+</sup>], 284 (18), 135 (100), 92 (4), 77 (5).

**IR** (KBr):  $\tilde{\nu}$  = 3279 (w), 2835 (w), 1647 (m), 1602 (m), 1525 (m), 1508 (s), 1389 (m), 1311 (s), 1245 (s), 1157 (s), 1135 (s), 1102 (vs), 1074 (s), 1031 (s), 888 (m), 831 (s), 759 (s).

**HRMS** for C<sub>15</sub>H<sub>11</sub>F<sub>3</sub>INO<sub>2</sub> (420.9787): found: 420.9797.

***N*-[2-Iodo-4-(trifluoromethyl)phenyl]-4-methoxybenzamide (6e)**

|                        |                                                       |                      |                          |                       |             |              |       |
|------------------------|-------------------------------------------------------|----------------------|--------------------------|-----------------------|-------------|--------------|-------|
| Acquisition Time (sec) | 4.0000                                                | Comment              | Benoit Blank, AK Knochel | Date                  | Jun 19 2006 |              |       |
| File Name              | \\srvknoch2\bblch\Spektr\NMR\600 MHz\bbl103_Proton_01 | Frequency (MHz)      | 599.68                   |                       |             |              |       |
| Nucleus                | <sup>1</sup> H                                        | Number of Transients | 8                        | Original Points Count | 28902       | Points Count | 32768 |
| Pulse Sequence         | s2pul                                                 | Solvent              | CHLOROFORM-D             | Sweep Width (Hz)      | 7225.43     |              |       |
| Temperature (degree C) | 27.000                                                |                      |                          |                       |             |              |       |

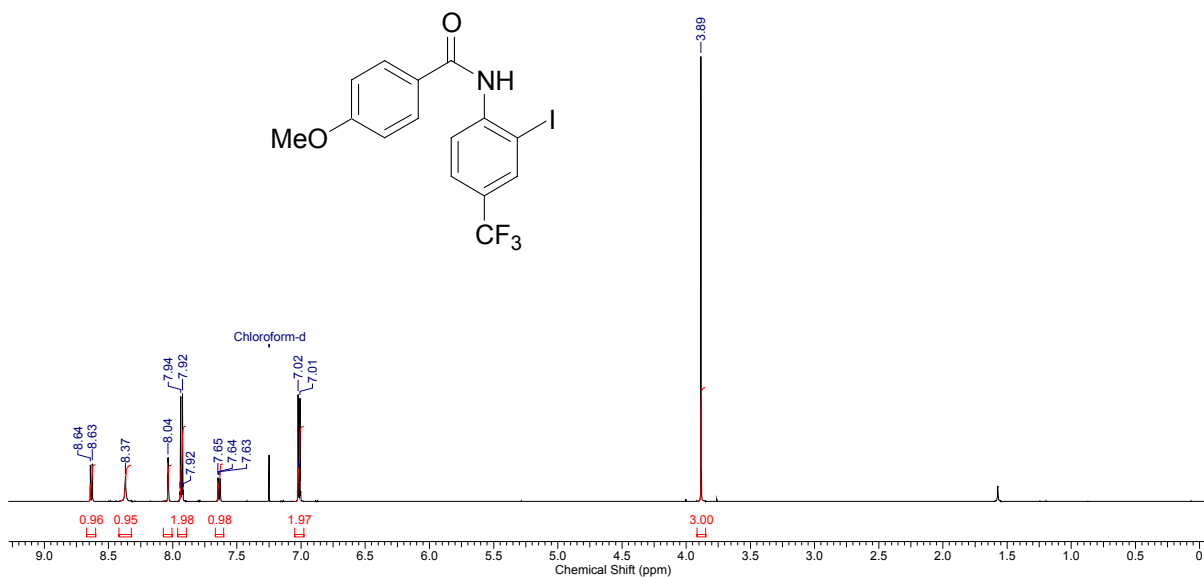

|                        |                                                           |                      |                          |                       |             |              |       |
|------------------------|-----------------------------------------------------------|----------------------|--------------------------|-----------------------|-------------|--------------|-------|
| Acquisition Time (sec) | 1.6000                                                    | Comment              | Benoit Blank, AK Knochel | Date                  | Jun 19 2006 |              |       |
| File Name              | \\srvknoch2\bblch\Spektr\NMR\600 MHz\bbl103_Carbon2048_01 | Frequency (MHz)      | 150.81                   |                       |             |              |       |
| Nucleus                | <sup>13</sup> C                                           | Number of Transients | 4096                     | Original Points Count | 58824       | Points Count | 65536 |
| Pulse Sequence         | s2pul                                                     | Solvent              | CHLOROFORM-D             | Sweep Width (Hz)      | 36764.71    |              |       |
| Temperature (degree C) | 27.000                                                    |                      |                          |                       |             |              |       |

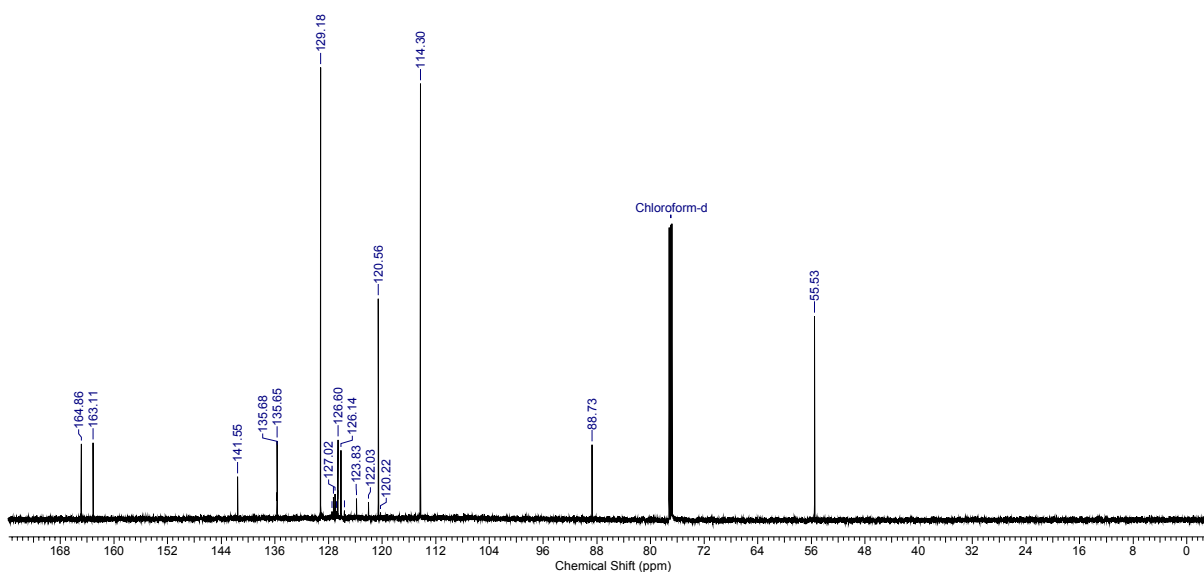

**Ethyl 3'-(1,3-dioxan-2-yl)-6-[(4-methoxybenzoyl)amino]biphenyl-3-carboxylate (7a)**

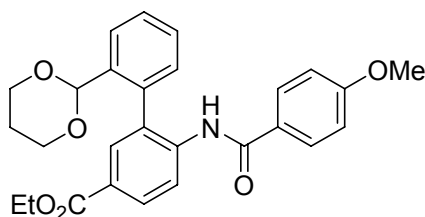

Prepared according to **TP 1** from bromo[3-(1,3-dioxan-2-yl)phenyl]magnesium (3.5 mL, 3.0 mmol, 0.86 M in THF), CuCN·2LiCl (2.8 mL, 2.8 mmol, 1.0 M in THF), Fe(acac)<sub>3</sub> (35 mg, 10 mol%) and ethyl 3-iodo-4-[(4-methoxybenzoyl)amino]benzoate (425 mg, 1.00 mmol). Reaction time: 4 h. Purification by flash chromatography (pentane/diethyl ether = 1:1) yielded **7a** as a pale yellow solid (348 mg, 75 %).

**Mp.:** 142.5-144.0 °C.

**<sup>1</sup>H-NMR** (600 MHz, CDCl<sub>3</sub>): δ = 8.73 (d, *J* = 8.6 Hz, 1H), 8.19 (s<sub>br</sub>, 1H), 8.08 (dd, *J* = 8.6, 2.0 Hz, 1H), 7.98 (d, *J* = 2.0 Hz, 1H), 7.67 (t, *J* = 1.8 Hz, 1H), 7.63-7.58 (m, 3H), 7.54 (t, *J* = 7.6 Hz, 1H), 7.42 (dt, *J* = 7.6, 1.6 Hz, 1H), 6.87-6.83 (m, 2H), 5.58 (s, 1H), 4.37 (q, *J* = 7.1 Hz, 2H), 4.27 (ddd, *J* = 12.0, 4.9, 1.2 Hz, 2H), 4.01 (td, *J* = 12.2, 2.5 Hz, 2H), 3.81 (s, 3H), 2.26-2.18 (m, 1H), 1.49-1.45 (m, 1H), 1.38 (t, *J* = 7.2 Hz, 3H).

**<sup>13</sup>C-NMR** (150 MHz, CDCl<sub>3</sub>): δ = 166.2, 164.6, 162.6, 140.2, 139.3, 137.1, 131.4, 131.0, 130.3, 129.8, 129.5, 129.0, 127.1, 126.6, 126.3, 125.5, 119.6, 113.9, 101.0, 67.4, 60.9, 55.4, 25.8, 14.4.

**MS** (70 eV, EI), *m/z* (%): 461 (37) [M<sup>+</sup>], 416 (5), 326 (10), 268 (6), 193 (19), 135 (100).

**IR** (KBr):  $\tilde{\nu}$  = 3426 (w), 2977 (w), 1723 (s), 1684 (m), 1585 (m), 1509 (s), 1376 (m), 1302 (m), 1239 (s), 1179 (s), 1093 (vs), 1020 (s); 904 (m), 841 (m), 767 (m), 740 (m).

**HRMS** for C<sub>27</sub>H<sub>27</sub>NO<sub>6</sub> (461.1838): found: 461.1846.

**Ethyl 3'-(1,3-dioxan-2-yl)-6-[(4-methoxybenzoyl)amino]biphenyl-3-carboxylate (7a)**

|                        |                                                          |                      |                          |                       |             |
|------------------------|----------------------------------------------------------|----------------------|--------------------------|-----------------------|-------------|
| Acquisition Time (sec) | 4.0000                                                   | Comment              | Benoit Blank, AK Knochel | Date                  | Jun 19 2006 |
| File Name              | \\svrknoc2\bblch\Spektren\NMR\600 MHz\bb1100_2_Proton_01 |                      |                          | Frequency (MHz)       | 599.68      |
| Nucleus                | 1H                                                       | Number of Transients | 8                        | Original Points Count | 28902       |
| Pulse Sequence         | s2pul                                                    | Solvent              | CHLOROFORM-D             | Points Count          | 32768       |
| Temperature (degree C) | 27.000                                                   |                      |                          | Sweep Width (Hz)      | 7225.43     |

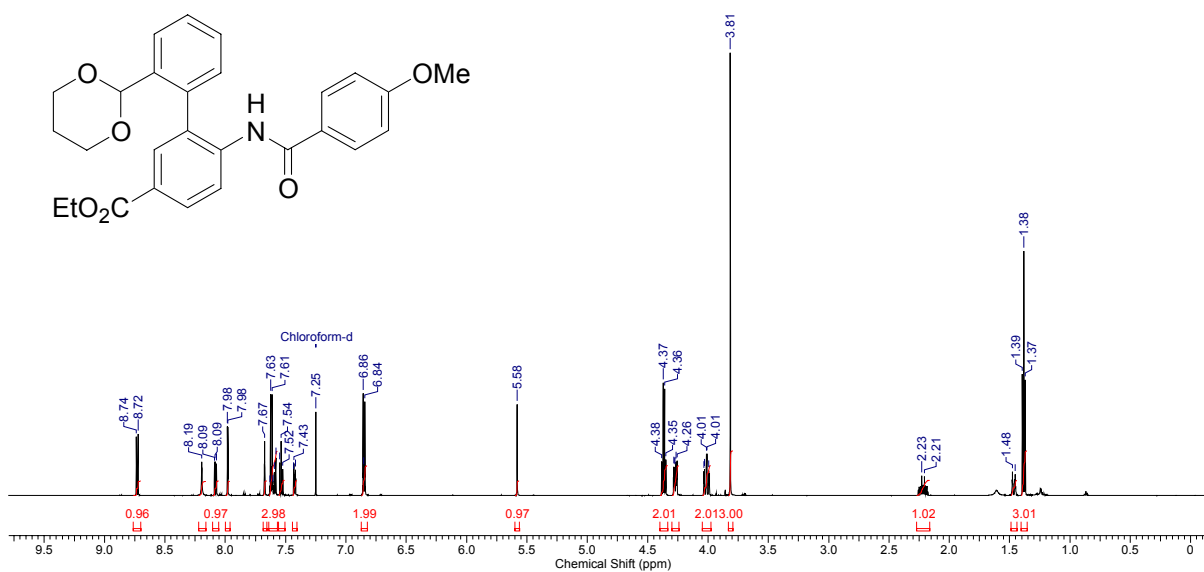

|                        |                                                              |                      |                          |                       |             |
|------------------------|--------------------------------------------------------------|----------------------|--------------------------|-----------------------|-------------|
| Acquisition Time (sec) | 1.6000                                                       | Comment              | Benoit Blank, AK Knochel | Date                  | Jun 19 2006 |
| File Name              | \\spknoch2\bblch\Spektren\NMR\600 MHz\bbf100_2_Carbon2048_01 |                      |                          | Frequency (MHz)       | 150.81      |
| Nucleus                | <sup>13</sup> C                                              | Number of Transients | 4096                     | Original Points Count | 58824       |
| Pulse Sequence         | s2pul                                                        | Solvent              | CHLOROFORM-D             | Points Count          | 65836       |
| Temperature (degree C) | 27.000                                                       |                      |                          | Sweep Width (Hz)      | 36764.71    |

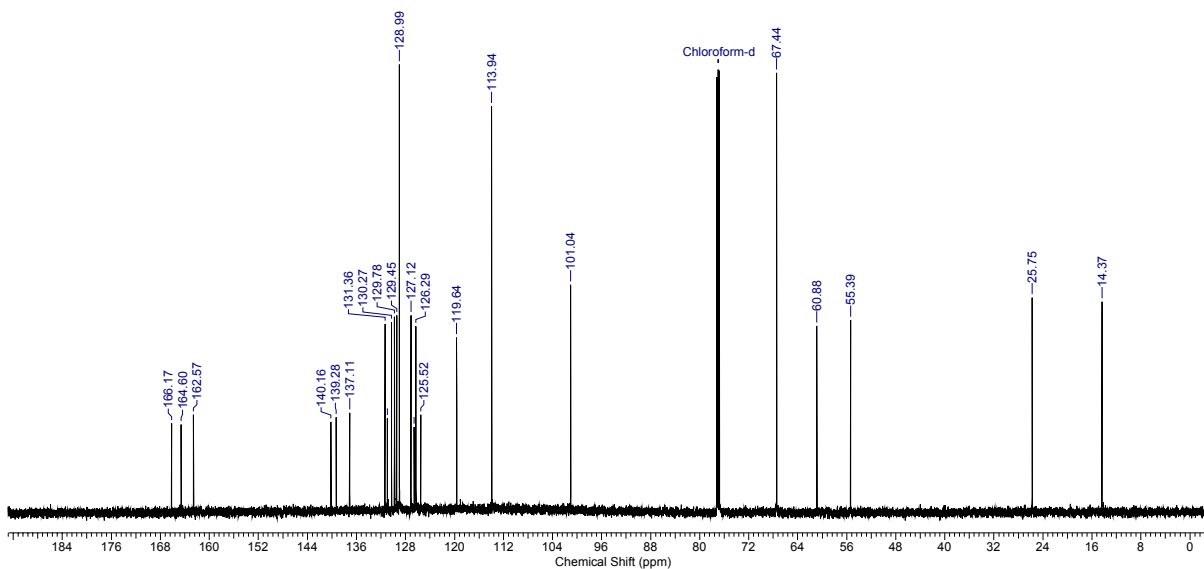

### *N*-[3'-(1,3-Dioxan-2-yl)-5-isocyanobiphenyl-2-yl]-4-methoxybenzamide (**7b**)

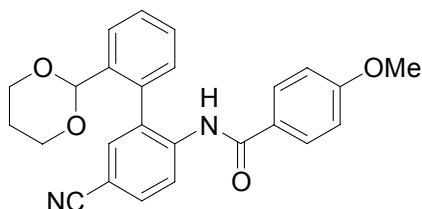

Prepared according to **TP 1** from bromo[3-(1,3-dioxan-2-yl)phenyl]magnesium (3.5 mL, 3.0 mmol, 0.86 M in THF), CuCN·2LiCl (2.8 mL, 2.8 mmol, 1.0 M in THF), Fe(acac)<sub>3</sub> (35 mg, 10 mol%) and *N*-(4-cyano-2-iodophenyl)-4-methoxybenzamide (378 mg, 1.00 mmol). Reaction time: 3 h. Purification by flash chromatography (pentane/diethyl ether = 3:1) yielded **7b** as a colorless solid (292 mg, 70 %).

**Mp.**: 145.2-146.8 °C.

**<sup>1</sup>H-NMR** (600 MHz, CDCl<sub>3</sub>): δ = 8.80 (d, *J* = 8.6 Hz, 1H), 8.21 (s<sub>br</sub>, 1H), 7.68 (dd, *J* = 8.6,

2.0 Hz, 1H), 7.66 (s, 1H), 7.62-7.59 (m, 3H), 7.58-7.54 (m, 2H), 7.40-7.37 (m, 1H), 7.87-7.84 (m, 2H), 5.58 (s, 1H), 4.29-4.25 (m, 2H), 4.02 (td,  $J= 12.3, 2.5$  Hz, 2H), 3.82 (s, 3H), 2.26-2.18 (m, 1H), 1.48 (d,  $J= 13.5$  Hz, 1H).

**$^{13}\text{C-NMR}$**  (150 MHz,  $\text{CDCl}_3$ ):  $\delta = 164.6, 162.8, 140.5, 139.4, 135.8, 133.6, 132.7, 131.8, 129.7, 129.5, 129.0, 126.9, 126.8, 126.1, 120.4, 118.8, 114.0, 106.8, 100.8, 67.5, 55.4, 25.7$ .

**MS** (70 eV, EI),  $m/z$  (%): 414 (14) [ $\text{M}^+$ ], 279 (8), 193 (14), 135 (100), 107 (5), 77 (6).

**IR** (KBr):  $\tilde{\nu} = 3420$  (w), 2953 (w), 2839 (w), 2222 (m), 1679 (m), 1581 (m), 1504 (s), 1465 (s), 1308 (m), 1245 (s), 1167 (s), 1147 (s), 1095 (vs), 1023 (s), 1005 (s), 988 (s), 828 (vs), 757 (s), 708 (s), 612 (s).

**HRMS** for  $\text{C}_{25}\text{H}_{22}\text{N}_2\text{O}_4$  (414.1580): found: 414.1587.

***N*-[3'-(1,3-Dioxan-2-yl)-5-isocyanobiphenyl-2-yl]-4-methoxybenzamide (7b)**

# Supplementary Material (ESI) for Chemical Communications

# This journal is (c) The Royal Society of Chemistry 2007

|                        |                                                         |                      |                          |                       |             |
|------------------------|---------------------------------------------------------|----------------------|--------------------------|-----------------------|-------------|
| Acquisition Time (sec) | 4.0000                                                  | Comment              | Benoit Blank, AK Knochel | Date                  | Jun 20 2006 |
| File Name              | \\srnknoch2\bblch\Spektren\NMR\600 MHz\bbl111_Proton_01 | Frequency (MHz)      | 599.68                   |                       |             |
| Nucleus                | <sup>1</sup> H                                          | Number of Transients | 8                        | Original Points Count | 28902       |
| Pulse Sequence         | s2pul                                                   | Solvent              | CHLOROFORM-D             | Points Count          | 32768       |
| Temperature (degree C) | 27.000                                                  | Sweep Width (Hz)     | 7225.43                  |                       |             |

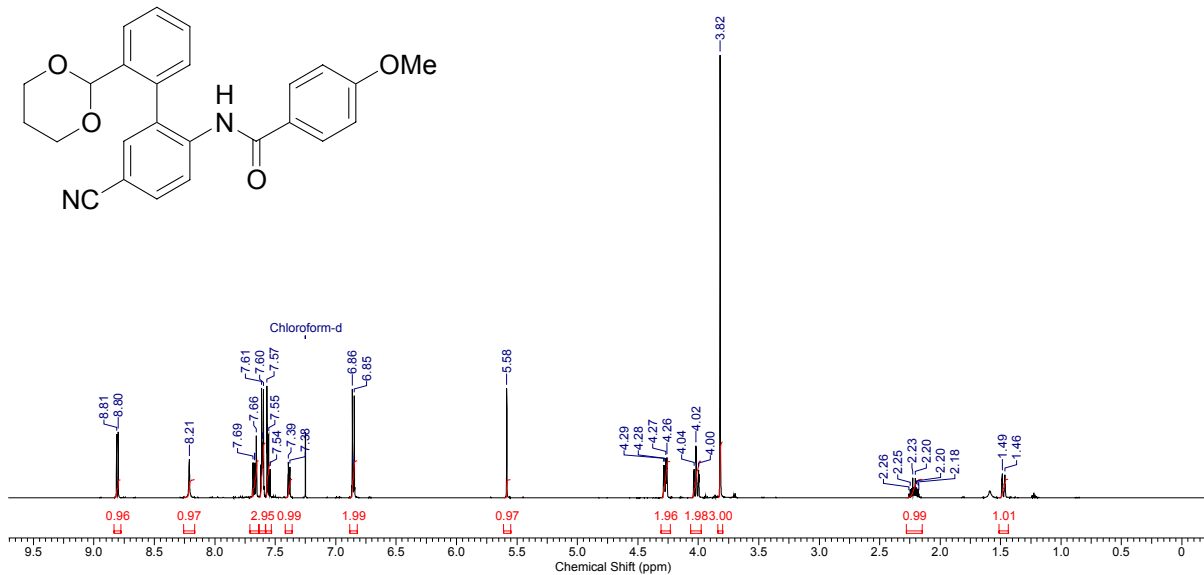

|                        |                                                             |                      |                          |                       |             |
|------------------------|-------------------------------------------------------------|----------------------|--------------------------|-----------------------|-------------|
| Acquisition Time (sec) | 1.6000                                                      | Comment              | Benoit Blank, AK Knochel | Date                  | Jun 20 2006 |
| File Name              | \\srnknoch2\bblch\Spektren\NMR\600 MHz\bbl111_Carbon2048_01 | Frequency (MHz)      | 150.81                   |                       |             |
| Nucleus                | <sup>13</sup> C                                             | Number of Transients | 4096                     | Original Points Count | 58824       |
| Pulse Sequence         | s2pul                                                       | Solvent              | CHLOROFORM-D             | Points Count          | 65536       |
| Temperature (degree C) | 27.000                                                      | Sweep Width (Hz)     | 36764.71                 |                       |             |

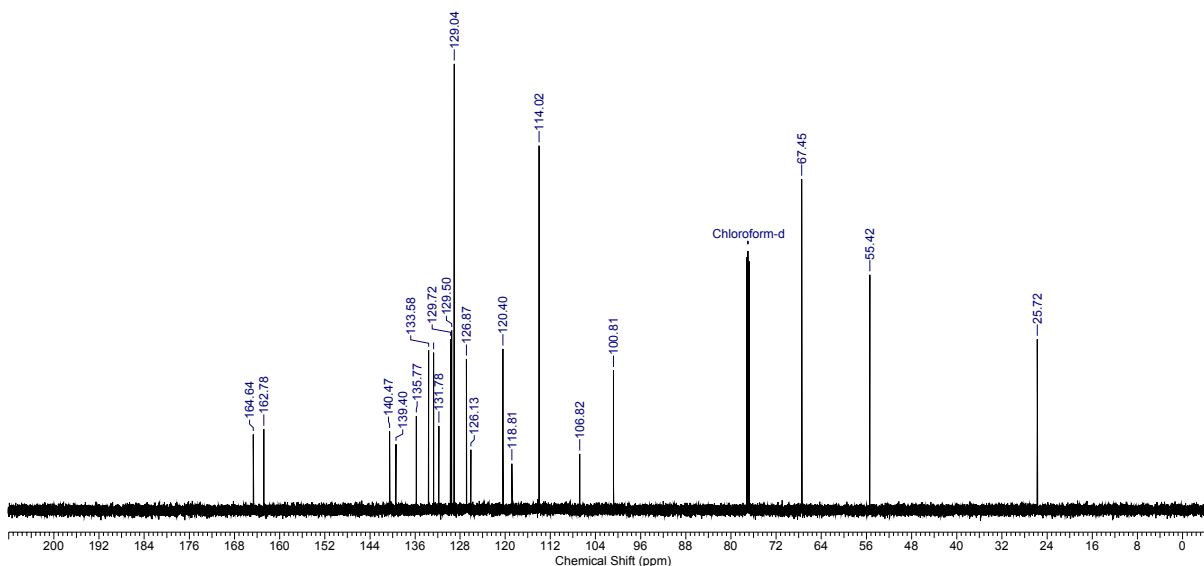

***N*-{2'-(1,3-Dioxan-2-yl)-5-[(triisopropylsilyloxy]biphenyl-2-yl}-4-methoxybenzamide  
(7c)**

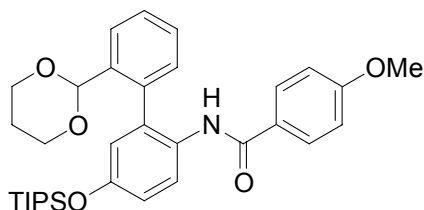

Prepared according to **TP 1** from bromo[3-(1,3-dioxan-2-yl)phenyl]magnesium (3.5 mL, 3.0 mmol, 0.86 M in THF), CuCN·2LiCl (2.8 mL, 2.8 mmol, 1.0 M in THF), Fe(acac)<sub>3</sub> (35 mg, 10 mol%) and *N*-{2-iodo-4-[(triisopropylsilyloxy)phenyl]-4-methoxybenzamide (525 mg, 1.00 mmol). Reaction time: 3 h. Purification by flash chromatography (pentane/diethyl ether = 5:2) yielded **7c** as a colorless highly viscous liquid (459 mg, 82 %).

<sup>1</sup>H-NMR (600 MHz, CDCl<sub>3</sub>): δ = 8.30 (d, *J* = 8.8 Hz, 1H), 7.82 (s\_br, 1H), 7.64 (s, 1H), 7.62 (d, 8.8 Hz, 2H), 7.53 (d, *J* = 7.7 Hz, 1H), 7.47 (t, *J* = 7.6 Hz, 1H), 7.38 (d, *J* = 7.5 Hz, 1H), 6.92 (dd, *J* = 8.8, 2.9 Hz, 1H), 6.86-6.82 (m, 3H), 5.54 (s, 1H), 4.26-4.22 (m, 2H), 3.98 (d, *J* = 2.2 Hz, 2H), 3.79 (s, 3H), 2.23-2.15 (m, 1H), 1.43 (d, *J* = 13.5 Hz, 1H), 1.29-1.24 (m, 3H), 1.11 (d, *J* = 7.5 Hz, 18H).

<sup>13</sup>C-NMR (150 MHz, CDCl<sub>3</sub>): δ = 164.5, 162.1, 152.4, 139.6, 138.0, 133.4, 129.7, 129.1, 128.8, 128.4, 127.2, 126.9, 125.7, 122.8, 121.1, 119.4, 113.7, 101.1, 67.3, 55.3, 25.7, 17.9, 12.6.

**MS** (70 eV, EI), *m/z* (%): 561 (90) [M<sup>+</sup>], 518 (15), 460 (36), 432 (11), 135 (100), 87 (14).

**IR** (KBr):  $\tilde{\nu}$  = 2944 (w), 1865 (w), 1666 (w), 1606 (m), 1504 (m), 1464 (m), 1375 (w), 1247 (m), 1208 (m), 1174 (m), 1103 (m), 995 (m), 880 (m), 794 (m), 759 (m), 683 (m).

**HRMS** for C<sub>33</sub>H<sub>43</sub>NO<sub>5</sub>Si (561.2911): found: 561.2916.



***N*-{2'-(1,3-Dioxan-2-yl)-5-[(triisopropylsilyloxy]biphenyl-2-yl}-4-methoxybenzamide  
(7c)**

|                               |                                                        |                             |                          |                              |            |
|-------------------------------|--------------------------------------------------------|-----------------------------|--------------------------|------------------------------|------------|
| <b>Acquisition Time (sec)</b> | 4.0000                                                 | <b>Comment</b>              | Benoit Blank, AK Knochel | <b>Date</b>                  | Jul 4 2006 |
| <b>File Name</b>              | \srvknoch2\bblch\Spektren\NMR\600 MHz\bbl123_Proton_01 |                             |                          | <b>Frequency (MHz)</b>       | 599.68     |
| <b>Nucleus</b>                | 1H                                                     | <b>Number of Transients</b> | 8                        | <b>Original Points Count</b> | 28902      |
| <b>Pulse Sequence</b>         | s2pul                                                  | <b>Solvent</b>              | CHLOROFORM-D             | <b>Sweep Width (Hz)</b>      | 7225.43    |
| <b>Temperature (degree C)</b> | 27.000                                                 |                             |                          |                              |            |

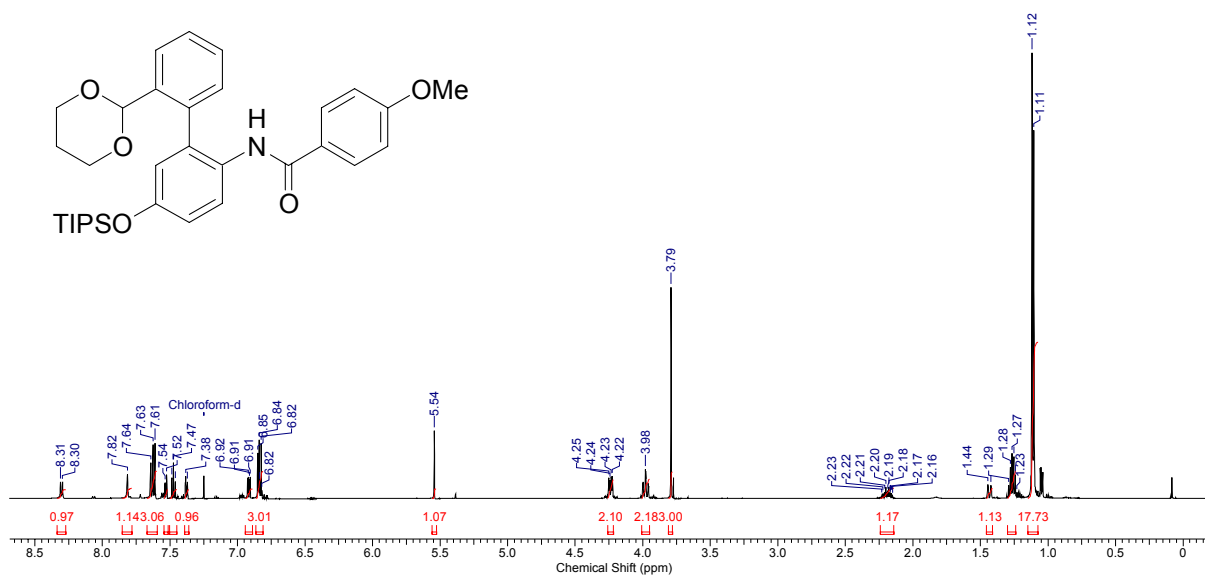

|                        |                                                               |                      |                          |                       |             |
|------------------------|---------------------------------------------------------------|----------------------|--------------------------|-----------------------|-------------|
| Acquisition Time (sec) | 1.6000                                                        | Comment              | Benoit Blank, AK Knochel | Date                  | Jul. 4 2006 |
| File Name              | \\svknknoch2\bblich\Spektren\NMR\600 MHz\bb1123_Carbon2048_01 |                      |                          | Frequency (MHz)       | 150.81      |
| Nucleus                | <sup>13</sup> C                                               | Number of Transients | 4096                     | Original Points Count | 58824       |
| Pulse Sequence         | s2pul                                                         | Solvent              | CHLOROFORM-D             | Points Count          | 65536       |
| Temperature (degree C) | 27.000                                                        |                      |                          | Sweep Width (Hz)      | 36764.71    |

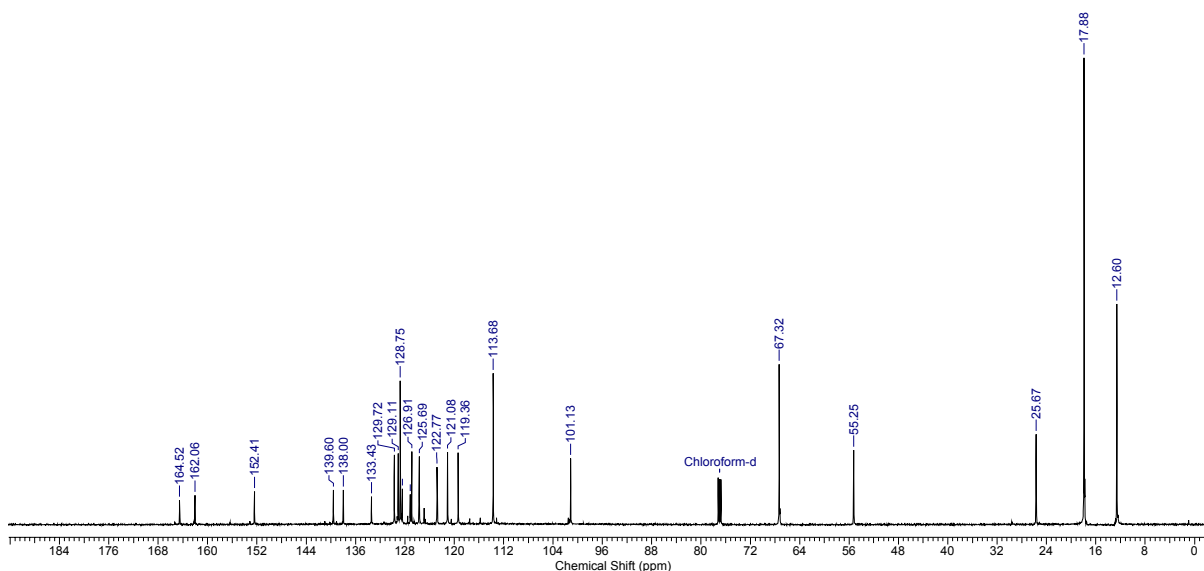

### *N*-(4'-Isocyano-5-methoxybiphenyl-2-yl)-4-methoxybenzamide (**7d**)

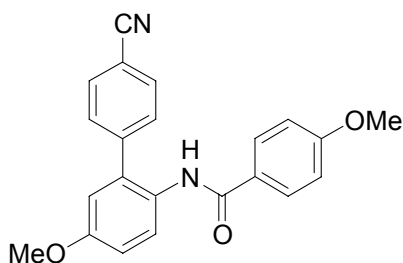

Prepared according to **TP 2** from 4-iodobenzonitrile (687 mg, 3.00 mmol), *i*PrMgCl (4.1 mL, 3.1 mmol, 0.76 M in THF), CuCN·2LiCl (2.8 mL, 2.8 mmol, 1.0 M in THF), Fe(acac)<sub>3</sub> (35 mg, 10 mol%) and *N*-(2-iodo-4-methoxyphenyl)-4-methoxybenzamide (383 mg, 1.00 mmol). Reaction time: 4 h. Purification by flash chromatography (pentane/diethyl ether = 1:1) yielded **7d** as a colorless solid (263 mg, 74 %).

**Mp.:** 212.8-215.0 °C.

<sup>1</sup>H-NMR (600 MHz, CDCl<sub>3</sub>): δ = 7.97 (t, *J* = 9.2 Hz, 1H), 7.73-7.70 (m, 2H), 7.58-7.52 (m,

4H), 7.48-7.42 (m, 1H), 7.00-6.96 (m, 1H), 6.90-6.86 (m, 2H), 6.81 (d,  $J = 2.7$  Hz, 1H), 3.83 (s, 6H).

**$^{13}\text{C-NMR}$**  (150 MHz,  $\text{CDCl}_3$ ):  $\delta = 165.2, 162.5, 157.1, 143.4, 134.2, 132.6, 129.9, 128.7, 127.4, 126.4, 126.0, 118.5, 115.3, 114.5, 114.0, 111.8, 55.6, 55.4$ .

**MS** (70 eV, EI),  $m/z$  (%): 358 (22) [ $\text{M}^+$ ], 135 (100), 107 (4), 77 (6).

**IR** (KBr):  $\tilde{\nu} = 3245$  (m), 3005 (w), 2838 (w), 2224 (m), 1624 (m), 1595 (vs), 1575 (w), 1526 (w), 1493 (s), 1315 (w), 1293 (w), 1260 (s), 1210 (s), 1172 (m), 1034 (m), 1014 (m), 841 (m), 852 (m), 802 (m), 769 (m), 658 (w).

**HRMS** for  $\text{C}_{22}\text{H}_{18}\text{N}_2\text{O}_3$  (358.1317): found: 358.1331.

***N*-(4'-Isocyano-5-methoxybiphenyl-2-yl)-4-methoxybenzamide (7d)**

|                        |                                                               |                      |                          |                       |             |
|------------------------|---------------------------------------------------------------|----------------------|--------------------------|-----------------------|-------------|
| Acquisition Time (sec) | 4.0000                                                        | Comment              | Benoit Blank, AK Knochel | Date                  | Jul 24 2006 |
| File Name              | \\141.84.254.80\NMR_Rohi600MHz\Knochel\Blank\bl128_Proton_01x |                      |                          | Frequency (MHz)       | 599.67      |
| Nucleus                | <sup>1</sup> H                                                | Number of Transients | 8                        | Original Points Count | 28902       |
| Pulse Sequence         | s2pul                                                         | Solvent              | CHLOROFORM-D             | Points Count          | 32768       |
| Temperature (degree C) | 25.000                                                        |                      |                          | Sweep Width (Hz)      | 7225.43     |

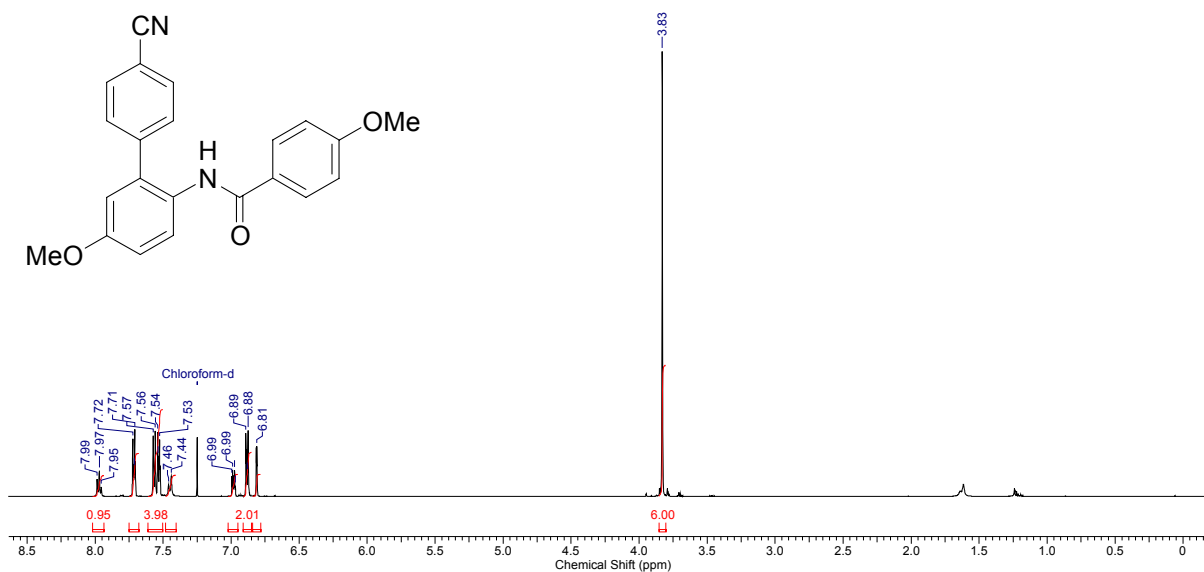

|                        |                                                                  |                      |                          |                       |             |
|------------------------|------------------------------------------------------------------|----------------------|--------------------------|-----------------------|-------------|
| Acquisition Time (sec) | 1.6000                                                           | Comment              | Benoit Blank, AK Knochel | Date                  | Jul 24 2006 |
| File Name              | \\141.84.254.80\NMR_Rohi600MHz\Knochel\Blank\bl128_Carbon2048_01 |                      |                          | Frequency (MHz)       | 150.80      |
| Nucleus                | <sup>13</sup> C                                                  | Number of Transients | 2048                     | Original Points Count | 58824       |
| Pulse Sequence         | s2pul                                                            | Solvent              | DEUTERIUM OXIDE          | Points Count          | 65536       |
| Temperature (degree C) | 25.000                                                           |                      |                          | Sweep Width (Hz)      | 36764.71    |

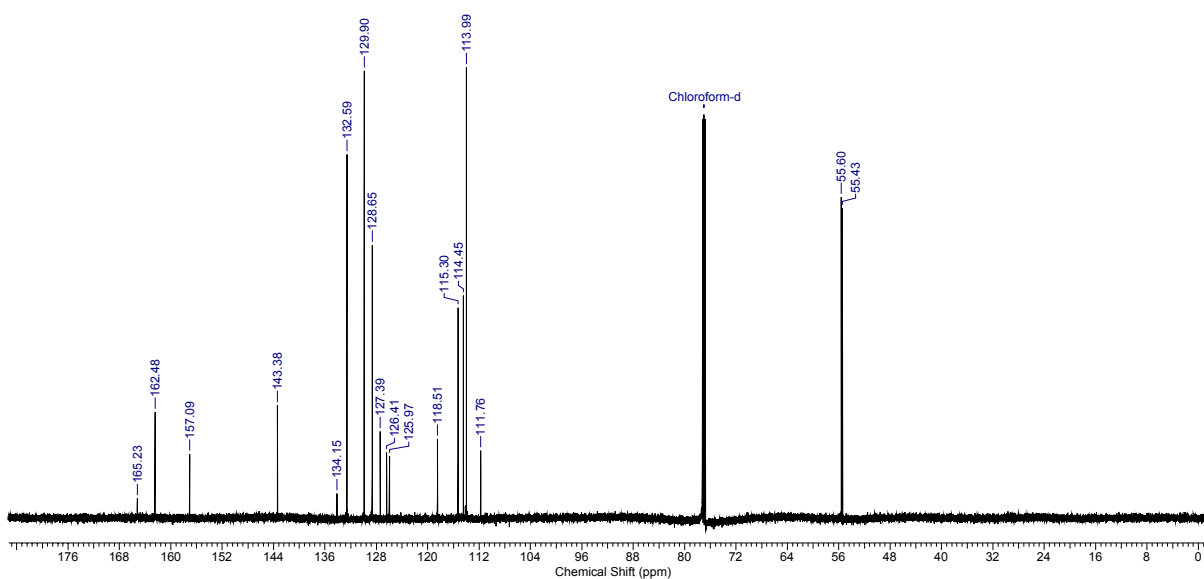

***N*-{4'-Cyano-5-[(triisopropylsilyloxy)biphenyl-2-yl]}-4-methoxybenzamide (**7e**)**

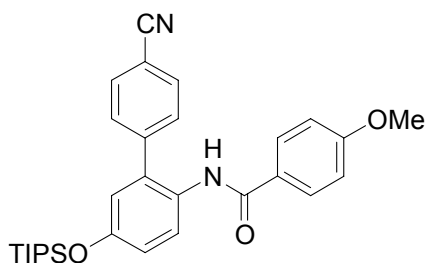

Prepared according to **TP 2** from 4-iodobenzonitrile (687 mg, 3.00 mmol), *i*PrMgCl (4.10 mL, 3.10 mmol, 0.76 M in THF), CuCN·2LiCl (2.8 mL, 2.8 mmol, 1.0 M in THF), Fe(acac)<sub>3</sub> (35 mg, 10 mol%) and *N*-{2-iodo-4-[(triisopropylsilyloxy)phenyl]}-4-methoxybenzamide (525 mg, 1.00 mmol). Reaction time: 2 h. Purification by flash chromatography (pentane/diethyl ether = 2:1) yielded **7e** as a colorless solid (481 mg, 96 %).

**Mp.:** 167.0-168.2 °C.

**<sup>1</sup>H-NMR** (600 MHz, CDCl<sub>3</sub>): δ = 7.98 (d, *J* = 8.8 Hz, 1H), 7.73 (d, *J* = 8.6 Hz, 2H), 7.56 (d, *J* = 8.8 Hz, 2H), 7.52 (d, *J* = 8.4 Hz, 2H), 7.41 (s<sub>br</sub>, 1H), 6.96 (dd, *J* = 8.8, 2.9 Hz, 1H), 6.89 (d, *J* = 8.8 Hz, 2H), 6.80 (d, *J* = 2.9 Hz, 1H), 3.83 (s, 3H), 1.29-1.23 (m, 3H), 1.11 (d, *J* = 7.5 Hz, 18H).

**<sup>13</sup>C-NMR** (300 MHz, CDCl<sub>3</sub>): δ = 165.0, 162.5, 153.5, 143.4, 133.6, 132.7, 129.9, 128.6, 127.7, 126.6, 125.4, 120.9, 120.5, 118.5, 114.0, 111.8, 55.4, 17.9, 12.7.

**MS** (70 eV, EI), *m/z* (%): 500 (62) [M<sup>+</sup>], 457 (59), 429 (26), 401 (18), 387 (9), 135 (100).

**IR** (KBr):  $\tilde{\nu}$  = 3208 (m), 2944 (s), 2866 (s), 2224 (m), 1641 (s), 1606 (s), 1578 (m), 1503 (s), 1485 (vs), 1463 (m), 1395 (w), 1291 (s), 1256 (s), 1208 (s), 1173 (m), 1015 (w), 943 (m), 878 (m), 835 (m), 795 (w), 676 (m).

**HRMS** for C<sub>30</sub>H<sub>36</sub>N<sub>2</sub>O<sub>3</sub>Si (500.2495): found: 500.2497.

***N*-{4'-Cyano-5-[(triisopropylsilyloxy)biphenyl-2-yl]}-4-methoxybenzamide (7e)**

|                        |                                                        |                      |                          |                       |             |
|------------------------|--------------------------------------------------------|----------------------|--------------------------|-----------------------|-------------|
| Acquisition Time (sec) | 4.0000                                                 | Comment              | Benoit Blank, AK Knochel | Date                  | Jun 30 2006 |
| File Name              | \\srknoch2\bblch\Spektren\NMR\600 MHz\bbl125_Proton_01 | Frequency (MHz)      | 599.68                   | Points Count          | 32768       |
| Nucleus                | <sup>1</sup> H                                         | Number of Transients | 8                        | Original Points Count | 28902       |
| Pulse Sequence         | s2pul                                                  | Solvent              | CHLOROFORM-D             | Sweep Width (Hz)      | 7225.43     |
| Temperature (degree C) | 27.000                                                 |                      |                          |                       |             |

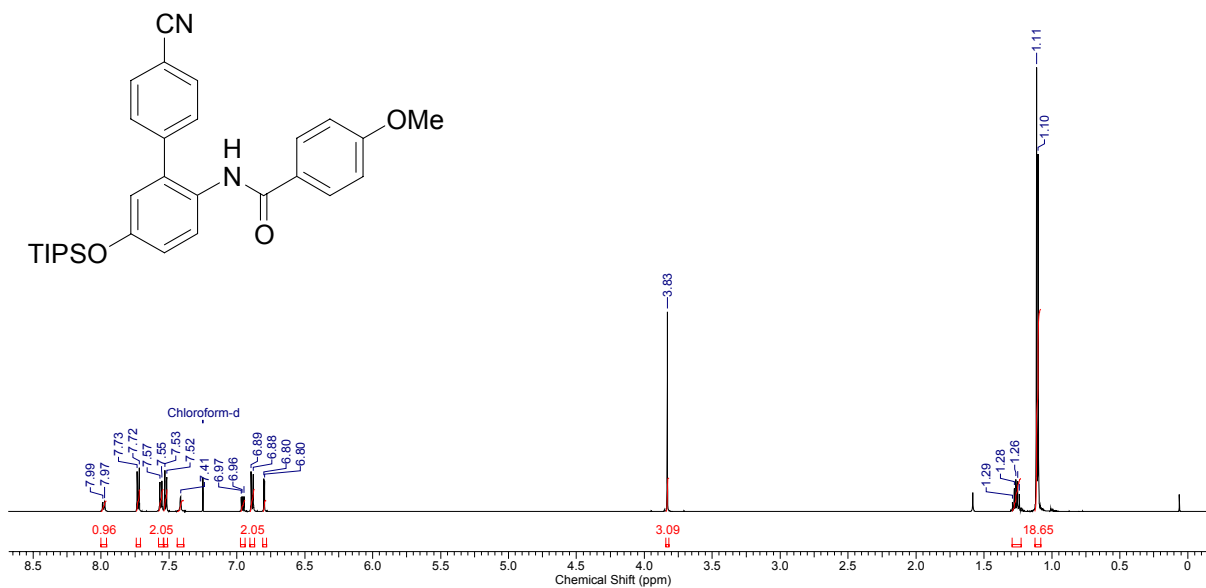

|                        |                                                            |                      |                          |                       |             |
|------------------------|------------------------------------------------------------|----------------------|--------------------------|-----------------------|-------------|
| Acquisition Time (sec) | 1.6000                                                     | Comment              | Benoit Blank, AK Knochel | Date                  | Jun 30 2006 |
| File Name              | \\srknoch2\bblch\Spektren\NMR\600 MHz\bbl125_Carbon2048_01 | Frequency (MHz)      | 150.81                   | Points Count          | 65536       |
| Nucleus                | <sup>13</sup> C                                            | Number of Transients | 2048                     | Original Points Count | 58824       |
| Pulse Sequence         | s2pul                                                      | Solvent              | CHLOROFORM-D             | Sweep Width (Hz)      | 36764.71    |
| Temperature (degree C) | 27.000                                                     |                      |                          |                       |             |

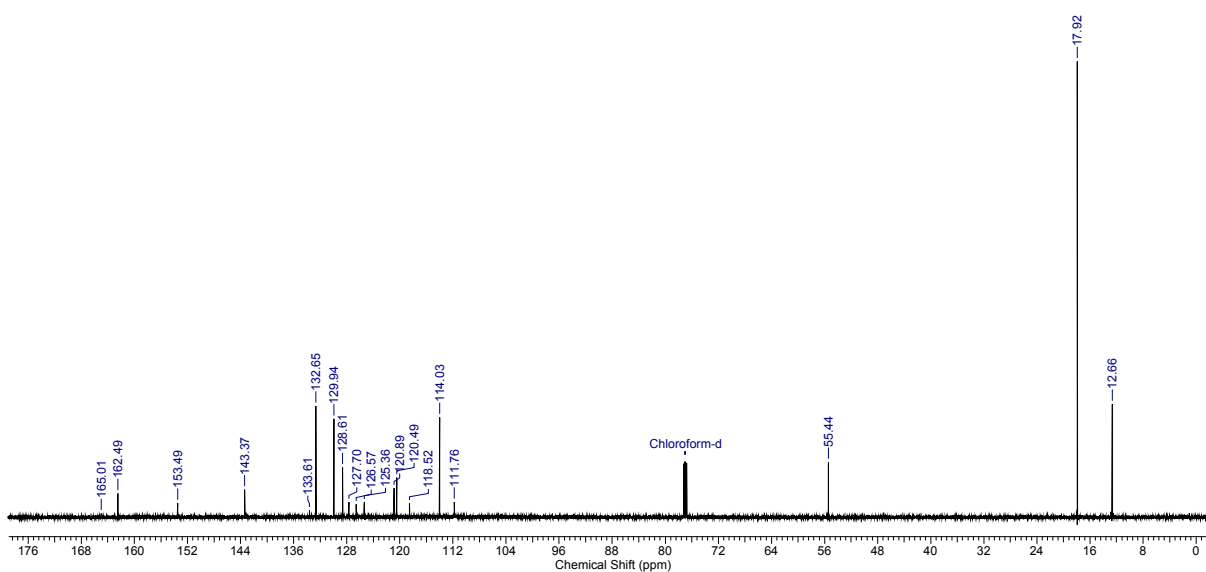

***N*-[3'-Cyano-5-(trifluoromethyl)biphenyl-2-yl]-4-methoxybenzamide (**7f**)**

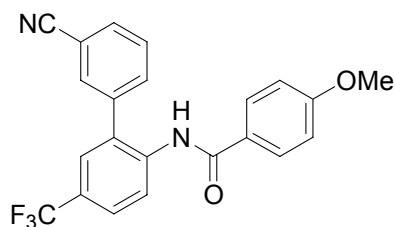

Prepared according to **TP 2** from 3-iodobenzonitrile (687 mg, 3.00 mmol), *i*PrMgCl (4.1 mL, 3.1 mmol, 0.86 M in THF), CuCN·2LiCl (2.8 mL, 2.8 mmol, 1.0 M in THF), Fe(acac)<sub>3</sub> (35 mg, 10 mol%) and *N*-[2-iodo-4-(trifluoromethyl)phenyl]-4-methoxybenzamide (421 mg, 1.00 mmol). Reaction time: 3 h. Purification by flash chromatography (pentane/diethyl ether = 3:2) yielded **7f** as a colorless solid (281 mg, 70 %).

**Mp.:** 150.9-151.7 °C.

**<sup>1</sup>H-NMR** (600 MHz, CDCl<sub>3</sub>): δ = 8.60 (d, *J* = 8.6 Hz, 1H), 7.79-7.75 (m, 2H), 7.74-7.69 (m, 3H), 7.66 (d, *J* = 7.7 Hz, 1H), 7.55-7.52 (m, 2H), 7.50 (d, *J* = 2.0 Hz, 1H), 6.91-6.88 (m, 2H), 3.83 (s, 3H).

**<sup>13</sup>C-NMR** (150 MHz, CDCl<sub>3</sub>): δ = 164.7, 162.9, 138.4, 138.1, 133.6, 132.7, 132.3, 130.3, 130.2, 128.7, 126.9 (q, *J* = 3.9 Hz), 126.6 (q, *J* = 3.9 Hz), 126.5 (q, *J* = 36.5 Hz), 126.0, 122.0 (q, *J* = 271.5 Hz), 121.9, 117.8, 114.2, 114.0, 55.5.

**MS** (70 eV, EI), *m/z* (%): 396 (5) [M<sup>+</sup>], 135 (100), 107 (4), 77 (6).

**IR** (KBr):  $\tilde{\nu}$  = 3257 (m), 2231 (m), 1665 (vs), 1603 (m), 1511 (s), 1488 (s), 1468 (m), 1415 (m), 1336 (s), 1314 (s), 1253 (s), 1175 (m), 1164 (m), 1109 (vs), 1078 (m), 1031 (m), 904 (w), 839 (m), 764 (w), 696 (w), 626 (w).

**HRMS** for C<sub>22</sub>H<sub>15</sub>F<sub>3</sub>N<sub>2</sub>O<sub>2</sub> (396.1086): found: 396.1088.

***N*-[3'-Cyano-5-(trifluoromethyl)biphenyl-2-yl]-4-methoxybenzamide (7f)**

|                        |                                                        |                      |                          |                       |             |
|------------------------|--------------------------------------------------------|----------------------|--------------------------|-----------------------|-------------|
| Acquisition Time (sec) | 4.0000                                                 | Comment              | Benoit Blank, AK Knochel | Date                  | Jun 30 2006 |
| File Name              | \usrvknoc2\bblch\Spektren\NMR\600 MHz\bbl120_Proton_01 |                      |                          | Frequency (MHz)       | 599.68      |
| Nucleus                | <sup>1</sup> H                                         | Number of Transients | 8                        | Original Points Count | 28902       |
| Pulse Sequence         | s2pul                                                  | Solvent              | CHLOROFORM-D             | Points Count          | 32768       |
| Temperature (degree C) | 27.000                                                 |                      |                          | Sweep Width (Hz)      | 7225.43     |

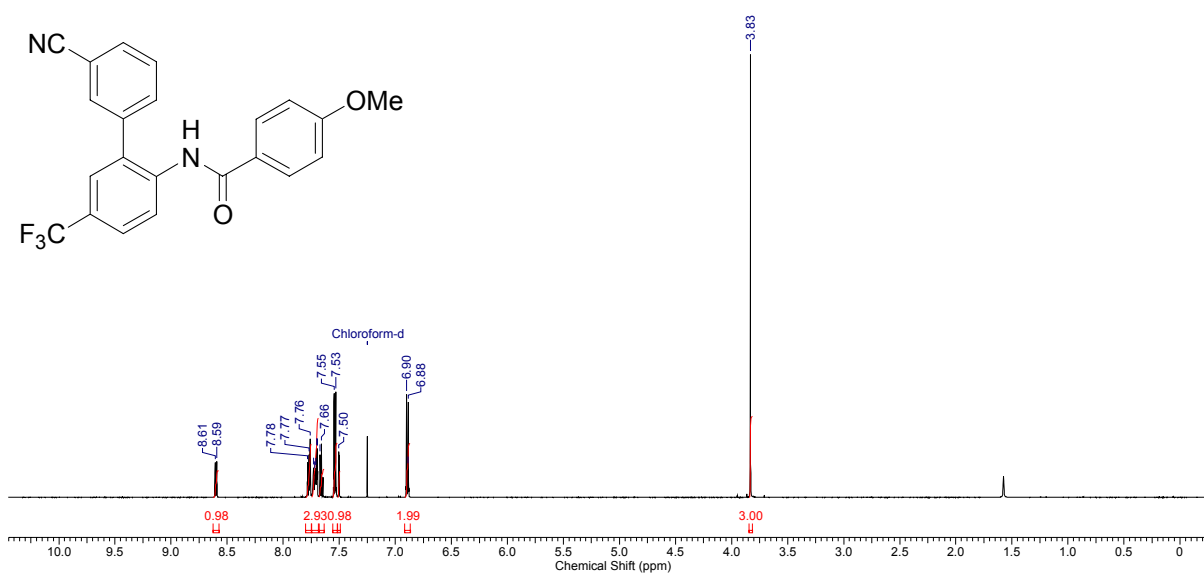



|                        |                                                              |                      |                          |                       |             |
|------------------------|--------------------------------------------------------------|----------------------|--------------------------|-----------------------|-------------|
| Acquisition Time (sec) | 1.6000                                                       | Comment              | Benoit Blank, AK Knochel | Date                  | Jun 30 2006 |
| File Name              | \\s\knoch2\bb\ch\Spektren\NMR\600 MHz\2\bb\120_Carbon2048_01 |                      |                          | Frequency (MHz)       | 150.81      |
| Nucleus                | <sup>13</sup> C                                              | Number of Transients | 2048                     | Original Points Count | 58824       |
| Pulse Sequence         | s2pul                                                        | Solvent              | CHLOROFORM-D             | Points Count          | 65536       |
| Temperature (degree C) | 27.000                                                       |                      |                          | Sweep Width (Hz)      | 36764.71    |

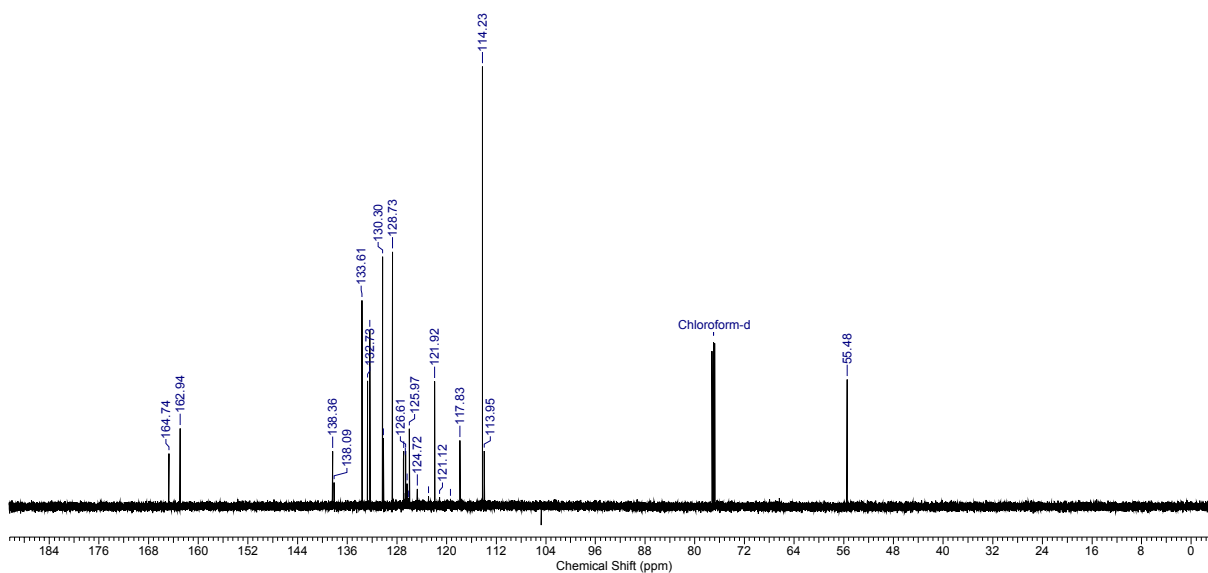

### *N*-[4'-(Dimethylamino)-5-isocyanophenyl-2-yl]-4-methoxybenzamide (**7g**)

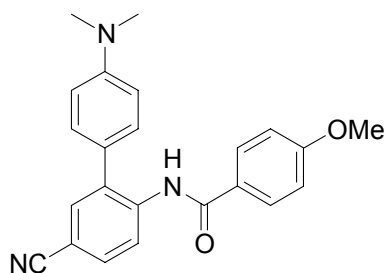

Prepared according to **TP 1** from 4-dimethylaminophenylmagnesium bromide (4.4 mL, 3.0 mmol, 0.68 M in THF), CuCN·2LiCl (2.8 mL, 2.8 mmol, 1.0 M in THF), Fe(acac)<sub>3</sub> (35 mg, 10 mol%) and *N*-(4-cyano-2-iodophenyl)-4-methoxybenzamide (378 mg, 1.00 mmol). Reaction time: 3 h. Purification by flash chromatography (pentane/diethyl ether = 2:1) yielded **7g** as a colorless solid (264 mg, 71 %).

**Mp.:** 174.7-175.7 °C.

**<sup>1</sup>H-NMR** (600 MHz, CDCl<sub>3</sub>):  $\delta$  = 8.73 (d,  $J$  = 8.8 Hz, 1H), 8.33 (s\_br, 1H), 7.63-7.58 (m, 3H), 7.52 (d,  $J$  = 2.0 Hz, 1H), 7.27-7.25 (m, 2H), 6.90-6.87 (m, 2H), 6.84 (d,  $J$  = 8.6 Hz, 2H), 3.83 (s, 3H), 3.04 (s, 6H).

**<sup>13</sup>C-NMR** (150 MHz, CDCl<sub>3</sub>):  $\delta$  = 164.6, 162.8, 150.7, 139.7, 133.7, 132.6, 131.8, 129.9, 128.9, 126.3, 122.6, 120.2, 119.1, 114.1, 112.9, 106.7, 55.5, 40.3.

**MS** (70 eV, EI),  $m/z$  (%): 371 (58) [M<sup>+</sup>], 135 (100), 107 (4), 77 (5).

**IR** (KBr):  $\tilde{\nu}$  = 3407 (s), 2980 (w), 2810 (w), 2221 (m), 1678 (m), 1603 (s), 1581 (s), 1521 (m), 1498 (vs), 1463 (s), 1403 (m), 1309 (m), 1247 (s), 1177 (s), 1123 (m), 1020 (m), 835 (m), 825 (m), 755 (m), 687 (w).

**HRMS** for C<sub>23</sub>H<sub>21</sub>N<sub>3</sub>O<sub>2</sub> (371.1634): found: 371.1619.

***N*-[4'-(Dimethylamino)-5-isocyanobiphenyl-2-yl]-4-methoxybenzamide (7g)**

|                        |                                                       |                      |                          |                       |            |
|------------------------|-------------------------------------------------------|----------------------|--------------------------|-----------------------|------------|
| Acquisition Time (sec) | 4.0000                                                | Comment              | Benoit Blank, AK Knochel | Date                  | Jul 4 2006 |
| File Name              | \\srvknoch2\bblch\Spektr\NMR\600 MHz\bbl126_Proton_01 |                      |                          | Frequency (MHz)       | 599.68     |
| Nucleus                | <sup>1</sup> H                                        | Number of Transients | 8                        | Original Points Count | 28902      |
| Pulse Sequence         | s2pul                                                 | Solvent              | CHLOROFORM-D             | Points Count          | 32768      |
| Temperature (degree C) | 27.000                                                |                      |                          | Sweep Width (Hz)      | 7225.43    |

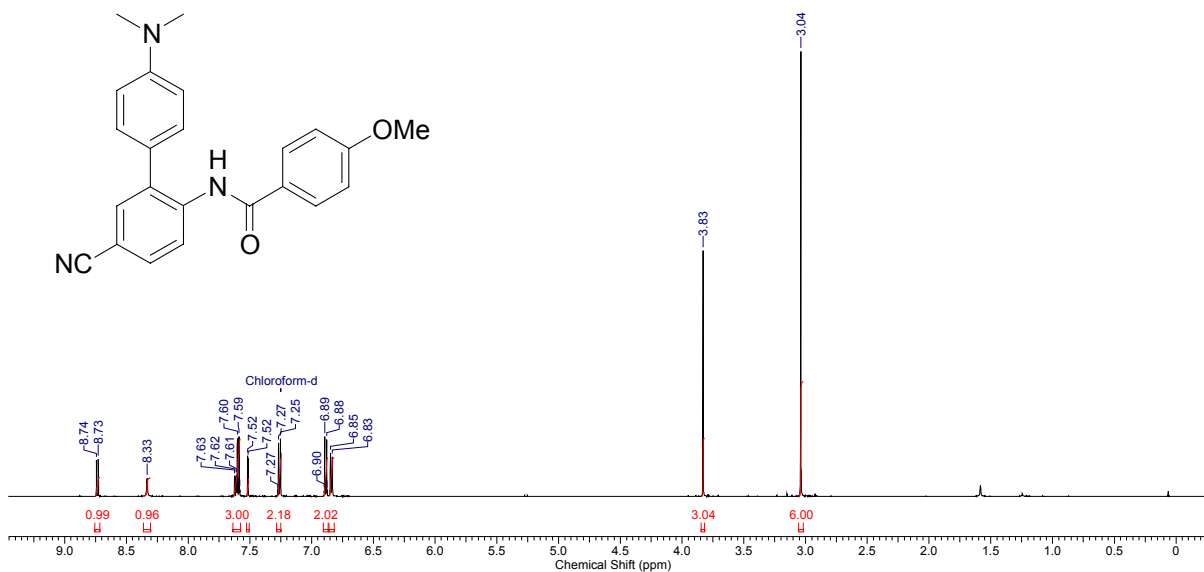

|                        |                                                           |                      |                          |                       |            |
|------------------------|-----------------------------------------------------------|----------------------|--------------------------|-----------------------|------------|
| Acquisition Time (sec) | 1.6000                                                    | Comment              | Benoit Blank, AK Knochel | Date                  | Jul 4 2006 |
| File Name              | \\srvknoch2\bblch\Spektr\NMR\600 MHz\bbl126_Carbon2048_01 |                      |                          | Frequency (MHz)       | 150.81     |
| Nucleus                | <sup>13</sup> C                                           | Number of Transients | 2048                     | Original Points Count | 58824      |
| Pulse Sequence         | s2pul                                                     | Solvent              | CHLOROFORM-D             | Points Count          | 65536      |
| Temperature (degree C) | 27.000                                                    |                      |                          | Sweep Width (Hz)      | 36764.71   |

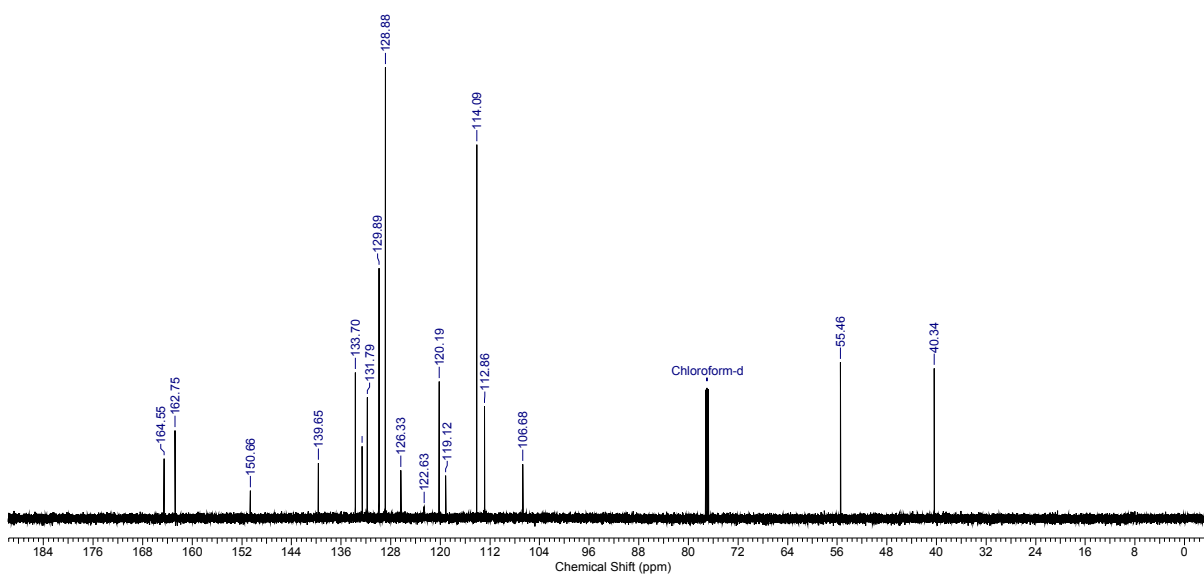

***N*-[2-(1,3-Benzodioxol-5-yl)-4-methoxyphenyl]-4-methoxybenzamide (**7h**)**

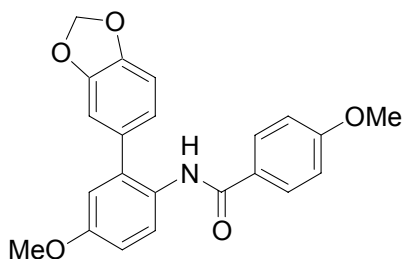

Prepared according to **TP 1** from 1,3-benzodioxol-5-yl(bromo)magnesium (3.9 mL, 3.0 mmol, 0.76 M in THF), CuCN·2LiCl (2.8 mL, 2.8 mmol, 1.0 M in THF), Fe(acac)<sub>3</sub> (35 mg, 10 mol%) and *N*-(2-iodo-4-methoxyphenyl)-4-methoxybenzamide (383 mg, 1.00 mmol). Reaction time: 3 h. Purification by flash chromatography (pentane/diethyl ether = 3:2) yielded **7h** as a colorless solid (316 mg, 84 %).

**Mp.:** 183.6-185.4 °C.

**<sup>1</sup>H-NMR** (600 MHz, CDCl<sub>3</sub>): δ = 8.28 (d, *J* = 8.8 Hz, 1H), 7.76 (s<sub>br</sub>, 1H), 7.62-7.58 (m, 2H), 6.94-6.87 (m, 6H), 6.80 (d, *J* = 3.1 Hz, 1H), 6.02 (s, 2H), 3.82 (s, 3H), 3.81 (s, 3H).

**<sup>13</sup>C-NMR** (150 MHz, CDCl<sub>3</sub>): δ = 164.6, 162.3, 156.1, 148.3, 147.5, 133.8, 131.9, 128.6, 128.4, 127.2, 123.3, 122.5, 115.6, 113.9, 113.3, 109.8, 108.7, 101.4, 55.5, 55.4.

**MS** (70 eV, EI), *m/z* (%): 377 (59) [M<sup>+</sup>], 135 (100), 107 (4), 77 (6).

**IR** (KBr):  $\tilde{\nu}$  = 3324 (m), 3083 (w), 2883 (w), 2779 (w), 1633 (m), 1606 (m), 1569 (w), 1486 (vs), 1434 (m), 1285 (m), 1260 (m), 1235 (m), 1213 (m), 1173 (m), 1103 (w), 1022 (m), 935 (w), 848 (w), 817 (w), 767 (w), 614 (w).

**HRMS** for C<sub>22</sub>H<sub>19</sub>NO<sub>5</sub> (377.1263): found: 377.1240.

***N*-[2-(1,3-Benzodioxol-5-yl)-4-methoxyphenyl]-4-methoxybenzamide (7h)**

|                        |                                                          |                      |                          |                       |             |
|------------------------|----------------------------------------------------------|----------------------|--------------------------|-----------------------|-------------|
| Acquisition Time (sec) | 4.0000                                                   | Comment              | Benoit Blank, AK Knochel | Date                  | Jun 30 2006 |
| File Name              | \usrvknocch2\bblch\Spektren\NMR\600 MHz\bbl122_Proton_01 |                      |                          | Frequency (MHz)       | 599.68      |
| Nucleus                | 1H                                                       | Number of Transients | 8                        | Original Points Count | 28902       |
| Pulse Sequence         | s2pul                                                    | Solvent              | CHLOROFORM-D             | Points Count          | 32768       |
| Temperature (degree C) | 27.000                                                   |                      |                          | Sweep Width (Hz)      | 7225.43     |

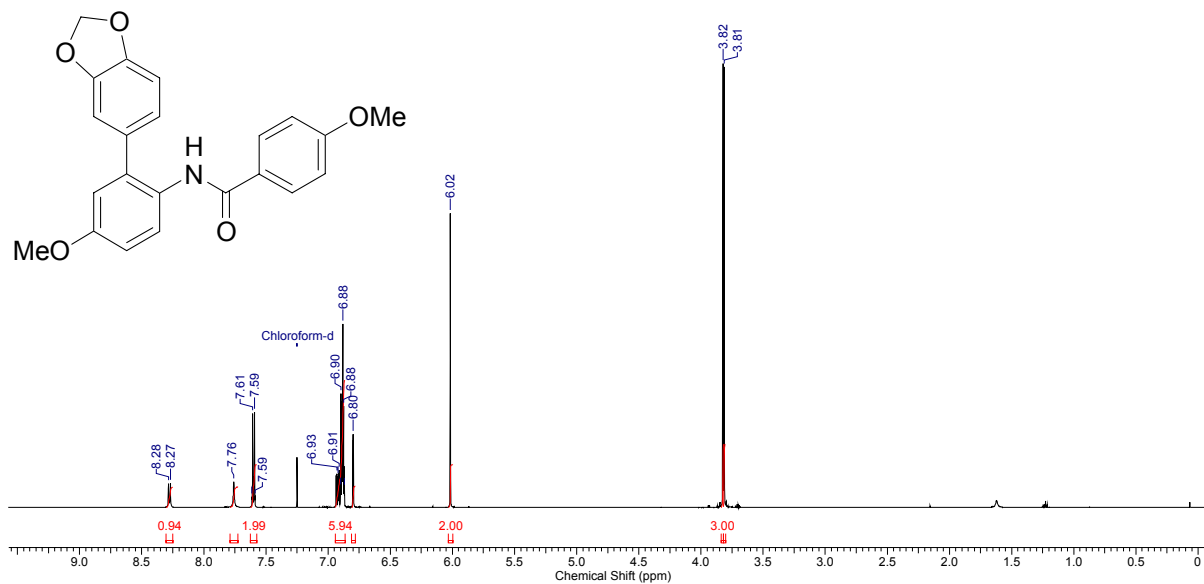

|                        |                                                          |                      |                          |                       |             |
|------------------------|----------------------------------------------------------|----------------------|--------------------------|-----------------------|-------------|
| Acquisition Time (sec) | 1.6000                                                   | Comment              | Benoit Blank, AK Knochel | Date                  | Jun 30 2006 |
| File Name              | \\spknoch2\bblch\Spektr\NMR\600 MHz\bb1122_Carbon2048_01 | Number of Transients | 2048                     | Original Points Count | 58824       |
| Nucleus                | 13C                                                      | Solvent              | CHLOROFORM-D             | Frequency (MHz)       | 150.81      |
| Pulse Sequence         | s2pul                                                    |                      |                          | Points Count          | 65536       |
| Temperature (degree C) | 27.000                                                   |                      |                          | Sweep Width (Hz)      | 36764.71    |

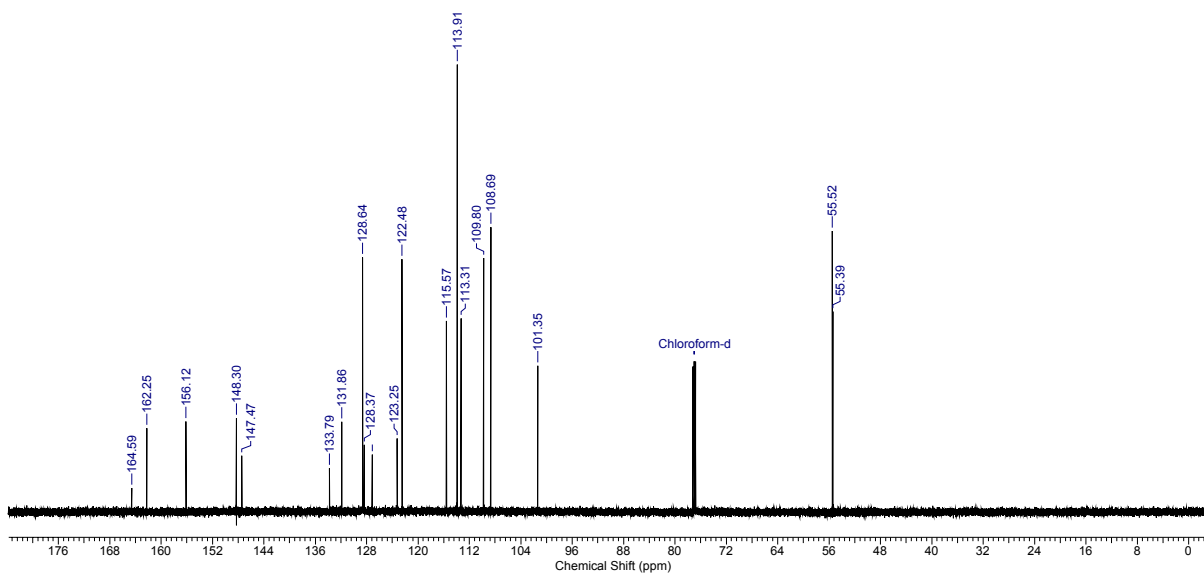

### Synthesis of 2-methoxyphenanthridin-6(5H)-one (**7i**)

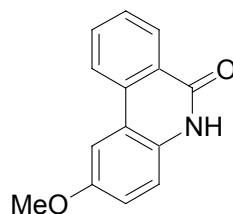

Prepared according to **TP 2** from ethyl 2-iodobenzoate (828 mg, 3.00 mmol), *i*PrMgCl (4.1 mL, 3.1 mmol, 0.76 M in THF), CuCN·2LiCl (2.8 mL, 2.8 mmol, 1.0 M in THF), Fe(acac)<sub>3</sub> (35 mg, 10 mol %) and *N*-(2-iodo-4-methoxyphenyl)-4-methoxybenzamide (383 mg, 1.00 mmol). Reaction time: 2 h. After workup, the crude compound was taken in CHCl<sub>3</sub> (5 mL), cooled to 0 °C and filtered through a glass sinter, affording **7i** as a pale brown solid (207 mg, 92 %).

**Mp.:** 224.5-225.3 °C.

**<sup>1</sup>H-NMR** (400 MHz, DMSO-d<sub>6</sub>): δ = 11.54 (s\_br, 1H), 8.53 (d, *J* = 8.2 Hz, 1H), 8.31 (d, *J* = 7.2 Hz, 1H), 7.83 (m, 2H), 7.63 (t, *J* = 7.5 Hz, 1H), 7.30 (d, *J* = 9.0 Hz, 1H), 7.12 (dd, *J* = 8.9, 2.6 Hz, 1H), 3.86 (s, 3H).

**<sup>13</sup>C-NMR** (100 MHz, DMSO-d<sub>6</sub>): δ = 160.3, 154.8, 134.0, 132.5, 130.7, 127.9, 127.4, 125.8, 122.9, 118.3, 117.7, 117.3, 106.2, 55.6.

**MS** (70 eV, ESI), *m/z* (%): 451 (100) [2M+H<sup>+</sup>], 226 (20) [M+H<sup>+</sup>].

**IR** (KBr):  $\tilde{\nu}$  = 3016 (m), 2871 (m), 1665 (vs), 1609 (s), 1504 (s), 1472 (m), 1446 (m), 1369 (m), 1269 (m), 1205 (m), 1151 (m), 1039 (m), 804 (m), 769 (m), 716 (m), 656 (m).

**HRMS** for C<sub>14</sub>H<sub>11</sub>NO<sub>2</sub> (225.0790): found: 225.0786.

### 2-methoxyphenanthridin-6(5H)-one

14 Dec 2006

| Acquisition Time (sec) | Comment                  | Date                  | Frequency (MHz) |
|------------------------|--------------------------|-----------------------|-----------------|
| 4.0000                 | Benoit Blank, AK Knochel | Jul 26 2006           | 399.92          |
| Nucleus                | Number of Transients     | Original Points Count | Points Count    |
| 1H                     | 64                       | 25641                 | 32768           |
| Temperature (grad C)   | Solvent                  | Sweep Width (Hz)      |                 |
| 27.000                 | dms0                     | 6410.26               |                 |

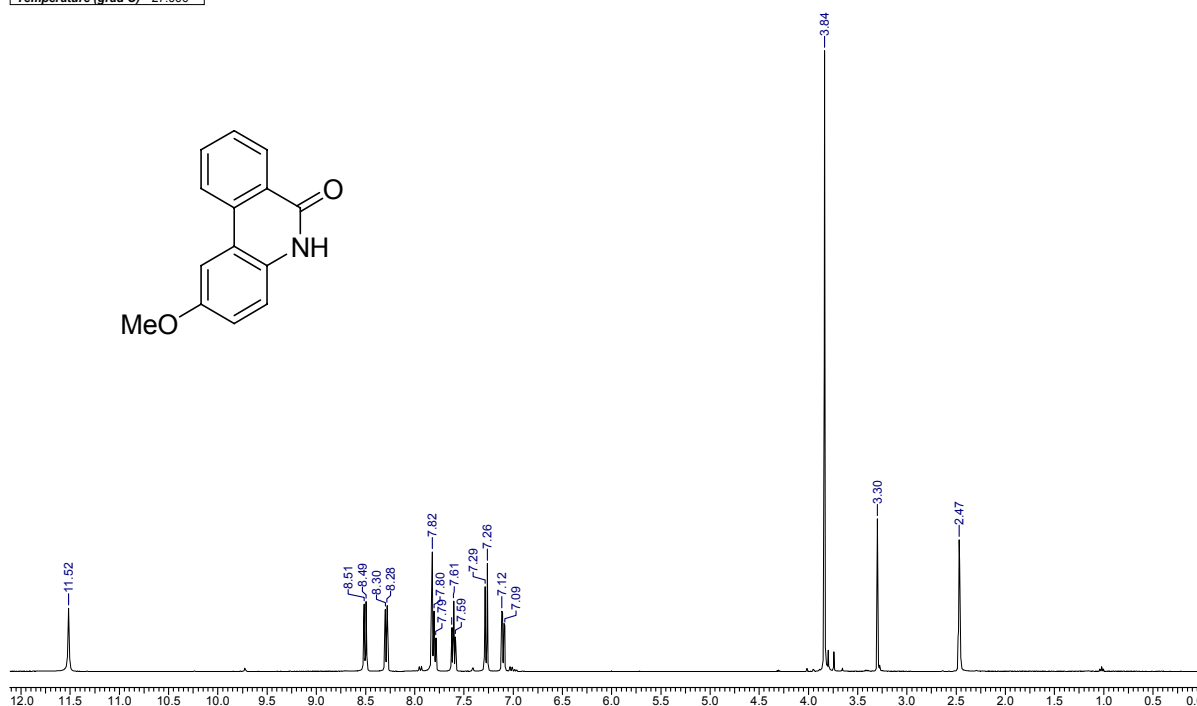

**2-methoxyphenanthridin-6(5H)-one**

14 Dec 2006

|                        |        |                      |                          |                       |             |                  |          |
|------------------------|--------|----------------------|--------------------------|-----------------------|-------------|------------------|----------|
| Acquisition Time (sec) | 1.6000 | Comment              | Benoit Blank, AK Knochel | Date                  | Jul 26 2006 | Frequency (MHz)  | 100.57   |
| Nucleus                | 13C    | Number of Transients | 2048                     | Original Points Count | 39216       | Points Count     | 65536    |
| Temperature (grad C)   | 27.000 |                      |                          | Solvent               | dms0        | Sweep Width (Hz) | 24509.80 |

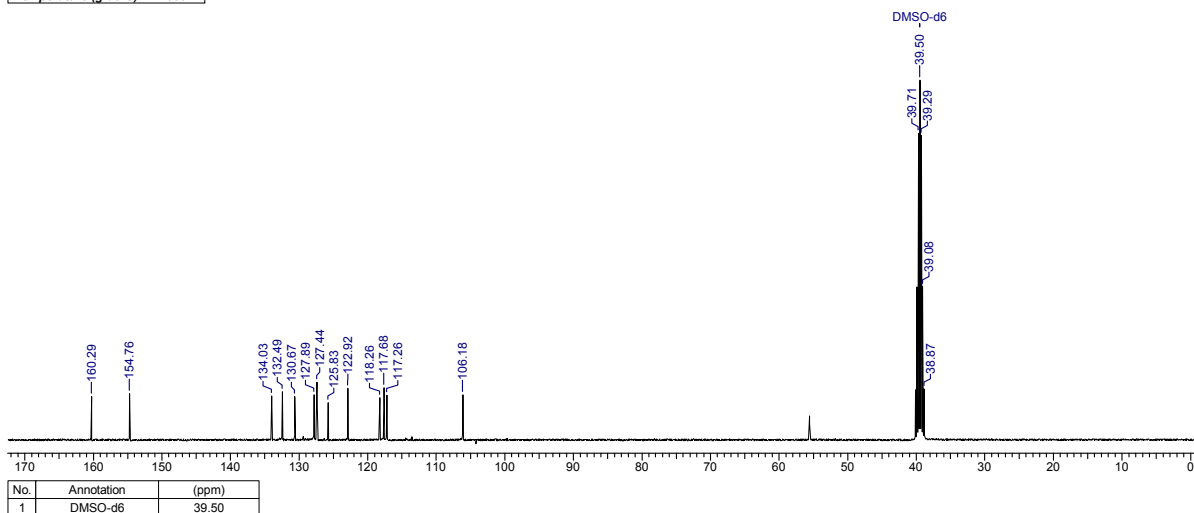**Synthesis of 2-(trifluoromethyl)phenanthridin-6(5H)-one (7j)**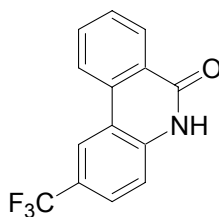

Prepared according to **TP 2** from ethyl 2-iodobenzoate (828 mg, 3.00 mmol), *i*PrMgCl (4.1 mL, 3.1 mmol, 0.76 M in THF), CuCN·2LiCl (2.8 mL, 2.8 mmol, 1.0 M in THF), Fe(acac)<sub>3</sub> (35 mg, 10 mol %) and *N*-[2-iodo-4-(trifluoromethyl)phenyl]-4-methoxybenzamide (421 mg, 1.00 mmol). Reaction time: 3 h. Purification by flash chromatography (CH<sub>2</sub>Cl<sub>2</sub>) yielded **7j** as a colorless solid (206 mg, 78 %).

**Mp.:** 293.2-294.7 °C.



**<sup>1</sup>H-NMR** (400 MHz, DMSO-d<sub>6</sub>): δ = 11.96 (s, 1H), 8.66 (s, 1H), 8.61 (d, *J* = 8.0 Hz, 1H), 8.32 (dd, *J* = 7.9, 1.5 Hz, 1H), 7.91-7.80 (m, 1H), 7.76 (dd, *J* = 8.6, 1.8 Hz, 1H), 7.67 (t, *J* = 7.5 Hz, 1H), 7.50 (d, *J* = 8.4 Hz, 1H).

**<sup>13</sup>C-NMR** (100 MHz, DMSO-d<sub>6</sub>): δ = 160.9, 139.2, 133.2, 133.0, 128.7, 127.4, 125.8 (q, *J* = 3.7 Hz), 125.7, 124.4 (q, *J* = 271.1 Hz), 123.0, 122.7 (q, *J* = 32.2 Hz), 120.7 (q, *J* = 4.1 Hz), 117.6, 116.7.

**MS** (70 eV, EI), *m/z* (%): 263 (100) [M<sup>+</sup>], 235 (8), 185 (2), 139 (2).

**IR** (KBr):  $\tilde{\nu}$  = 2884 (w), 2360 (w), 2341 (w), 1684 (m), 1609 (m), 1358 (m), 1324 (m), 1296 (m), 1269 (m), 1114 (vs), 1075 (m), 1021 (w), 898 (m), 877 (m), 832 (m), 775 (s), 682 (m), 640 (s), 617 (w).

**HRMS** for C<sub>14</sub>H<sub>18</sub>F<sub>3</sub>NO (263.0558): found: 263.0563.

### 2-(trifluoromethyl)phenanthridin-6(5H)-one

14 Dec 2006

|                        |        |                      |                          |                       |       |              |       |                 |        |                  |         |
|------------------------|--------|----------------------|--------------------------|-----------------------|-------|--------------|-------|-----------------|--------|------------------|---------|
| Acquisition Time (sec) | 4.0000 | Comment              | Benoit Blank, AK Knochel |                       | Date  | Jul 4 2006   |       | Frequency (MHz) | 399.92 |                  |         |
| Nucleus                | 1H     | Number of Transients | 64                       | Original Points Count | 25641 | Points Count | 32768 | Solvent         | dms0   | Sweep Width (Hz) | 6410.26 |
| Temperature (grad C)   | 27.000 |                      |                          |                       |       |              |       |                 |        |                  |         |

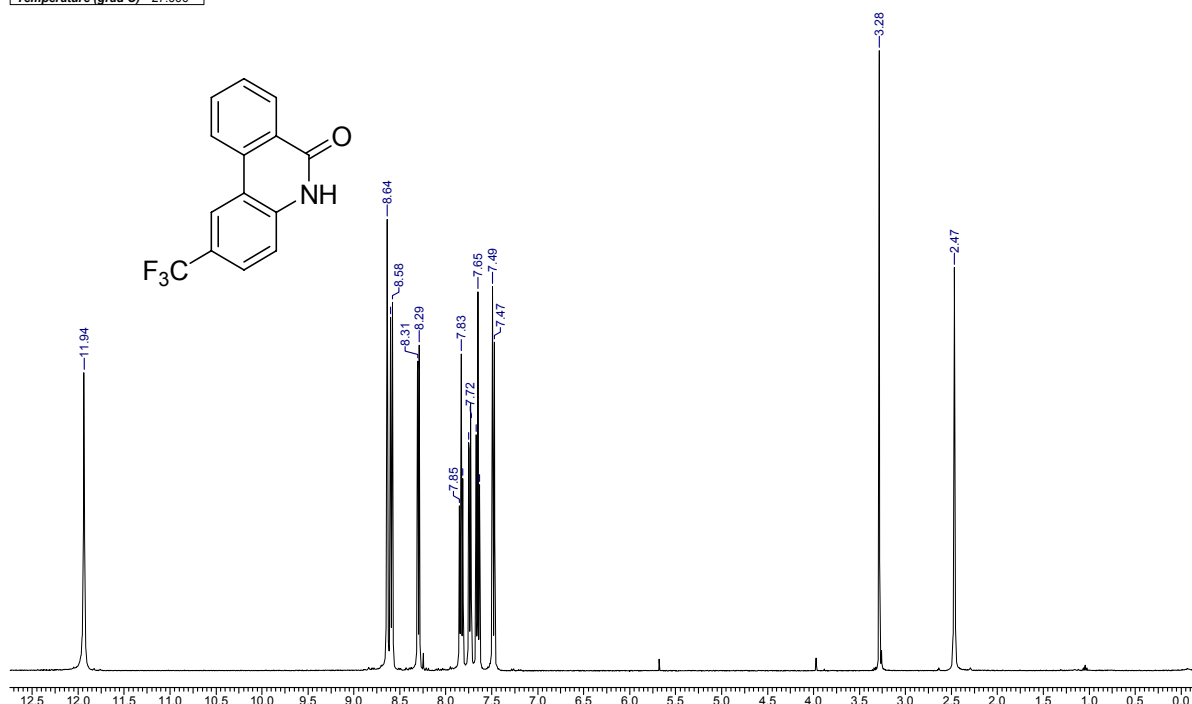

# Supplementary Material (ESI) for Chemical Communications

# This journal is (c) The Royal Society of Chemistry 2007

### 2-(trifluoromethyl)phenanthridin-6(5H)-one

14 Dec 2006

|                        |                 |                      |                          |                       |       |              |                 |         |      |                  |          |
|------------------------|-----------------|----------------------|--------------------------|-----------------------|-------|--------------|-----------------|---------|------|------------------|----------|
| Acquisition Time (sec) | 1.6000          | Comment              | Benoit Blank, AK Knochel |                       | Date  | Jul 4 2006   | Frequency (MHz) | 100.57  |      |                  |          |
| Nucleus                | <sup>13</sup> C | Number of Transients | 2048                     | Original Points Count | 39216 | Points Count | 65536           | Solvent | dmsc | Sweep Width (Hz) | 24509.80 |
| Temperature (grad C)   | 27.000          |                      |                          |                       |       |              |                 |         |      |                  |          |

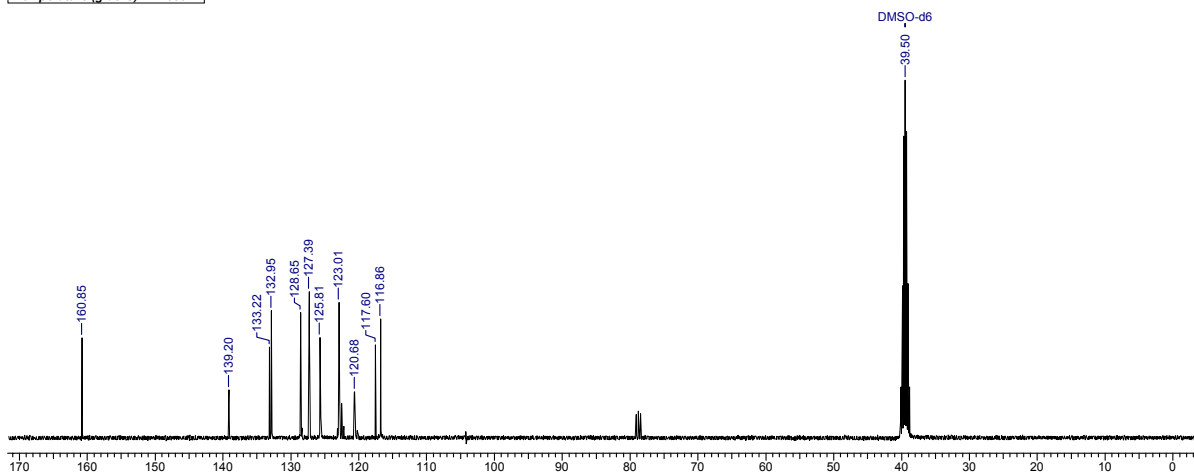

| No. | Annotation | (ppm) |
|-----|------------|-------|
| 1   | DMSO-d6    | 39.50 |
